# Supplementary material for: Optimized Methods for Obtaining scRNA-seq and snRNA-seq Data from Skeletal Muscle Stored in Nucleic Acid Stabilizing Preservative
Source: Research Square preprint supplement (doi:10.21203/rs.3.rs-4656169/v1), 2024-08-14
Supplement: Supplementary file 1 [file 85c64fde636bc4979b4f4f5d.xlsx]

## Sheet: Sup.Table1
Gene	mean	variance	variance.standardized
HBB	0.482467	45.3678	10.3177
DLC1	0.0848675	0.946667	7.82482
LRRTM4	0.0545276	0.537239	7.47981
AC096577.1	0.0130763	0.097588	6.3285
PDZRN4	0.0183396	0.193778	6.12457
HBA2	0.0628787	0.679774	5.68109
MEG3	0.0482117	0.332218	5.31518
CACNA1C	0.034223	0.22043	5.15912
HBA1	0.0344336	0.245142	5.0353
AC104574.2	0.0116494	0.0947927	4.90905
DIRC3	0.020094	0.221712	4.87764
MEG8	0.0292638	0.159596	4.42574
IL1RAPL1	0.0341295	0.179124	4.20496
COL15A1	0.0908091	0.540364	4.11077
KAZN	0.0370769	0.182564	3.91326
DIO2	0.034878	0.168312	3.85833
HMCN2	0.0586914	0.295867	3.78517
LINC01950	0.0312756	0.146421	3.78012
HS6ST3	0.0132401	0.0585409	3.74797
LINC02511	0.0120471	0.0528866	3.73039
MYH15	0.00713467	0.0978952	3.70556
LAMA2	0.136237	0.806975	3.68305
2024-03-01	0.0100587	0.0432693	3.66848
LDB2	0.0414513	0.191554	3.62922
ANO2	0.0284919	0.126165	3.60033
MECOM	0.0302229	0.129479	3.46838
EPS8	0.0402115	0.175912	3.44728
GUCY1A2	0.0255211	0.106465	3.41844
AL589693.1	0.00842125	0.0346909	3.3728
EBF1	0.0627617	0.284285	3.36391
ST6GALNAC3	0.0312522	0.129322	3.34138
NEGR1	0.0385038	0.16166	3.32387
MUC3A	0.0107137	0.0414778	3.29817
AC008014.1	0.293761	2.01701	3.27817
SCN7A	0.0292872	0.117323	3.2507
LINC02664	0.00666682	0.0259451	3.24824
VMO1	0.0178718	0.0699529	3.22547
MYH11	0.0272053	0.107265	3.2162
CARMN	0.0187607	0.071745	3.19353
CADM2	0.193151	1.07131	3.09537
AL110292.1	0.00664343	0.0238634	3.07553
AJ009632.2	0.0476035	0.188737	3.0629
SPOCK3	0.00168425	0.00584539	3.04975
NES	0.0248895	0.270925	3.00579
SAXO1	0.00161407	0.00549473	2.99524
MYH8	0.00442116	0.0248003	2.98266
LHFPL6	0.0376851	0.14144	2.97793
DACH1	0.0229947	0.0825394	2.96135
LINC00578	0.00159068	0.00636034	2.95375
PTPRC	0.00308779	0.0104705	2.9439
SLIT3	0.0144097	0.0500871	2.93787
PCDH9	0.0466678	0.176848	2.9345
AC090403.1	0.0729608	0.295299	2.92724
ABCA8	0.0397904	0.147079	2.91609
CFD	0.0965871	0.412375	2.90681
EGFLAM	0.0339189	0.121803	2.87876
RGS6	0.014129	0.0478962	2.86715
ARL15	0.0354628	0.126795	2.85409
GPC6	0.0120003	0.0402088	2.84746
BTNL9	0.0312756	0.110208	2.84523
DMD	3.18768	80.7951	2.83826
PDGFRB	0.0252404	0.0872968	2.83631
NEAT1	2.91338	68.4186	2.82641
SHISA9	0.00147372	0.0046998	2.81361
NKAIN3	0.028024	0.0964823	2.80252
ARHGAP24	0.0525392	0.191167	2.77628
NR2F2-AS1	0.0291937	0.0992694	2.75993
EBF2	0.0296147	0.100461	2.75049
SLC16A12	0.00505275	0.0161624	2.74636
PID1	0.0294276	0.0996299	2.74635
PRUNE2	0.00771948	0.0291348	2.73577
PDE4D	1.72448	26.2852	2.71792
MAML2	0.0291937	0.0975383	2.7118
AL357507.1	0.00603523	0.019099	2.71105
FBN1	0.0408431	0.140093	2.69824
MALAT1	11.0413	827.734	2.69798
MAPK10	0.00729842	0.0226846	2.65858
WFDC10B	0.000935694	0.00640878	2.65315
BICC1	0.199794	0.959871	2.65055
PCDH7	0.00381295	0.0125475	2.64992
LINC01934	0.00175443	0.00563461	2.64893
SOX5	0.0332172	0.109405	2.64558
WFDC3	0.00147372	0.00970588	2.64407
AC020637.1	0.013357	0.0416247	2.64087
ABLIM3	0.0347377	0.114144	2.62819
NCAM2	0.0148308	0.0461448	2.6271
TSHZ2	0.0244216	0.0780037	2.6251
TENM2	0.00545042	0.0341941	2.61221
ABCA10	0.114085	0.455942	2.60922
CLCN5	0.0208426	0.0652295	2.59727
NOX4	0.00568434	0.0171615	2.58741
LINC01411	0.00177782	0.00523685	2.58434
LINC02119	0.0924466	0.346183	2.57616
LINC00589	0.0015205	0.00460609	2.57209
LRMDA	0.0381062	0.122788	2.55372
CALCR	0.0055206	0.0164381	2.55268
U91319.1	0.00105266	0.00371836	2.55138
BMPER	0.0141758	0.0426081	2.54188
KCNQ5	0.462373	3.00675	2.53648
ADAMTS9-AS2	0.0549487	0.182884	2.52399
AL592156.2	0.00392992	0.0172485	2.52259
AC093607.1	0.0213104	0.0647887	2.51973
AC008571.2	0.00895927	0.0263771	2.51452
UNC13C	0.0941075	0.343371	2.49963
SHISA6	0.0082809	0.0242133	2.49958
CDH4	0.0141992	0.0417419	2.48596
FLT1	0.0332172	0.10248	2.47814
ARHGAP15	0.00432759	0.0124497	2.47688
AGBL1	0.324054	1.74679	2.47071
CD96	0.00807036	0.0233044	2.46887
MYH1	16.1154	1640.05	2.46209
AL583785.1	0.00610541	0.0238469	2.45634
SPAG17	0.00617558	0.0176469	2.44774
AC007319.1	0.0102225	0.0293472	2.4477
IGSF22	0.00163747	0.00458233	2.44384
SKAP1	0.00222227	0.00619418	2.43538
AFF3	0.0157898	0.0453902	2.4214
ESRRG	0.0675571	0.221926	2.40914
PLXDC2	0.263538	1.2725	2.40723
FILIP1L	1.65421	21.6787	2.40607
AL035401.1	0.00231584	0.00633411	2.3877
CLSTN2	0.0237666	0.0685378	2.37424
RGS5	0.0546679	0.170844	2.37165
MYO1B	0.014129	0.0395683	2.36863
DNER	0.00173103	0.011132	2.36378
NAV3	0.0768907	0.253492	2.36053
RORA	1.29007	13.9908	2.35645
MIR548A1HG	0.00219888	0.00621768	2.34664
PTCHD1-AS	0.0496854	0.150848	2.33321
PTPRB	0.0292872	0.0841521	2.33162
AC020687.1	0.0449133	0.134551	2.33049
AC024230.1	0.00369599	0.00995172	2.32665
NSG2	0.0012398	0.00521508	2.32266
AL445250.1	0.0115792	0.0316101	2.32173
LINC01151	0.0803995	0.262999	2.32121
MPZ	0.00205853	0.00837042	2.32112
PDE1C	0.0112751	0.0306111	2.31033
KCND2	0.00430419	0.0115376	2.30812
CD247	0.00299422	0.00794462	2.30485
DENND2C	0.524574	3.29885	2.30452
ABCA9	0.0436501	0.128533	2.29854
CCDC85A	0.0226672	0.0630447	2.29661
VCAM1	0.000538024	0.00133311	2.28898
INPP4B	0.122248	0.436398	2.28785
TNXB	0.0609137	0.186708	2.2876
RIMS1	0.00797679	0.0211537	2.26744
SLIT2	0.0351587	0.099751	2.26665
PAX7	0.0236263	0.0649419	2.26389
LINC01605	0.00297083	0.00955887	2.2568
KCNMB2	0.00273691	0.00708056	2.25082
MYH3	0.0102692	0.0270537	2.24598
NCAM1	0.0139185	0.0369308	2.24536
KCNQ1OT1	0.0241643	0.0659221	2.24368
SMOC2	0.0287024	0.0792033	2.24245
LGR5	0.0957449	0.314333	2.2399
FBXL7	0.0370301	0.104341	2.23967
LRP1B	0.0229713	0.0620717	2.22941
AC004053.1	0.00322815	0.00827067	2.2222
NOVA1	0.015322	0.0403051	2.2184
GALNT17	0.0045849	0.0118158	2.21649
F13A1	0.00381295	0.00978709	2.21604
SLC30A8	0.00088891	0.00402279	2.21234
VWF	0.0538726	0.15624	2.20542
TPRG1	0.0266205	0.0718561	2.20526
AC011287.1	0.364593	1.83989	2.1977
SLC22A3	0.0572879	0.167042	2.1977
AL008633.1	0.0986222	0.319833	2.19685
XIRP2	2.60179	43.4041	2.19404
RUNX1	0.0211233	0.0558605	2.19291
LINC02233	0.000631594	0.0016605	2.19264
FYB1	0.00166086	0.00413779	2.19015
COL23A1	0.00481883	0.0122814	2.19005
PDZD2	0.0760018	0.231919	2.18988
CACNA1D	0.00187139	0.00467508	2.18917
LINC00377	0.00601184	0.015333	2.18499
KLHL29	0.0958619	0.306615	2.1816
CTNNA3	1.08187	9.69256	2.17944
ATP8A2	0.00456151	0.0365423	2.17532
THSD7B	0.00481883	0.0121879	2.17336
TAFA1	0.0117897	0.0301314	2.17276
ATRNL1	0.0653115	0.192328	2.1723
RYR3	0.169595	0.632367	2.17103
PKD1L1	0.0209829	0.0547904	2.16615
WWOX	0.151138	0.540107	2.15551
AC090809.1	0.00133336	0.00507448	2.13303
GRID2	0.00378956	0.0102317	2.13272
ADAMTS12	0.013474	0.0338785	2.13014
ZNF385D	0.0279305	0.0730011	2.12807
HMCN1	0.0147606	0.0370938	2.12221
LINC01060	0.00290065	0.00705624	2.11435
AC007563.2	0.0311352	0.0814906	2.11408
CCL14	0.00135676	0.00453638	2.11274
ARHGAP28	0.019135	0.0483847	2.10917
ABCA6	0.0418957	0.112238	2.10136
EMCN	0.0241643	0.0616178	2.09718
FGF13	0.359049	1.71409	2.0932
LINC00598	0.00437437	0.0106246	2.09076
PLCB4	0.0378722	0.0996464	2.08656
LINC01344	0.00205853	0.00780899	2.08251
MYH7B	0.161875	0.569613	2.07875
DCN	0.106997	0.334813	2.07718
PITPNC1	0.0250064	0.0632139	2.07437
ADGRF5	0.0298487	0.0763992	2.07412
PCNX2	0.00400009	0.00959848	2.06916
OLFML2B	0.00584809	0.0140951	2.06515
TRHDE	0.00874874	0.0210706	2.05771
AC104041.1	0.00984818	0.0237404	2.05639
NLGN1	0.00966104	0.0232762	2.05574
AC012409.2	0.00589487	0.0141414	2.05538
AL606807.1	0.031182	0.0792887	2.05362
MIR3659HG	0.000959087	0.00226819	2.05261
DANT2	0.00662004	0.01584	2.04874
PRKCH	0.0602821	0.165052	2.04696
CDH13	0.716578	4.72392	2.04686
BMP5	0.0124681	0.0300448	2.04602
NCALD	0.0872067	0.255846	2.04557
PRKG1	0.707712	4.62559	2.04348
LINC01500	0.00219888	0.0051416	2.04345
AL136441.1	0.00297083	0.00698565	2.04289
SLC8A1	0.00884231	0.0211158	2.03997
FRMD3	0.0747854	0.211563	2.03649
AC087627.1	0.00414045	0.00978448	2.0363
NPAS3	0.0310884	0.078312	2.03492
MACROD2	0.133851	0.434877	2.03037
CDH20	0.0113453	0.0270304	2.02719
FYB2	0.0339891	0.0858897	2.02539
KIAA1217	0.687244	4.3765	2.02359
RAD51B	0.0361646	0.0917023	2.02024
GREM2	0.0195326	0.0473166	2.01818
CAMK4	0.000912302	0.00217471	2.01726
LINC01708	0.0015205	0.00409145	2.01614
LINC01416	0.000842125	0.00187072	2.01401
RBPMS	0.0206788	0.0501011	2.01164
GALNTL6	0.00243281	0.00560838	2.01017
MYLK4	0.177969	0.623468	2.00862
MEF2C-AS1	0.108026	0.327668	2.00856
ZNF385B	0.0864816	0.248556	2.00772
COL6A3	0.0826218	0.234729	2.0045
NPSR1-AS1	0.0229713	0.0557089	2.00088
KCNIP1	0.00390652	0.00903779	1.99609
SOX6	0.548738	3.05674	1.9951
EDA	0.0191116	0.0456018	1.99044
IQCM	0.00816393	0.0189986	1.98953
EFNA5	0.0108541	0.0253337	1.98787
SCHLAP1	0.00383635	0.0088278	1.98632
CACNB2	0.0107371	0.0250321	1.98604
TPO	0.0160939	0.037965	1.98545
FAM155A	0.00238602	0.00542146	1.98214
LILRB5	0.00107605	0.00238492	1.982
NNMT	0.00596505	0.0143978	1.98006
TMEM108	0.0831131	0.233361	1.97853
FTX	0.448595	2.23501	1.97185
APOD	0.110131	0.329173	1.96942
SPOCK1	0.0301995	0.0732669	1.96425
AC105180.2	0.00130997	0.00425579	1.96418
ARHGAP6	0.242485	0.925012	1.96329
PFKFB3	0.164916	0.551168	1.96303
KIAA1549L	0.00208192	0.014663	1.96234
ABLIM1	0.0695923	0.187189	1.96229
ACADL	0.016398	0.0382592	1.96213
LRRC3B	0.0335213	0.0818509	1.95965
HDAC4	0.472947	2.40217	1.95951
FLI1	0.0160004	0.0370791	1.95094
GNLY	0.00114623	0.00250173	1.9451
AC117386.2	0.00884231	0.0201333	1.94506
HCN1	0.0448665	0.112144	1.94467
CYYR1	0.0136144	0.0312547	1.94421
GRK5	0.0258953	0.0614844	1.94366
UNC5C	0.00463169	0.0104586	1.94172
ZBTB16	0.837774	5.72321	1.94013
LINC02237	0.0036726	0.00824421	1.94008
SNTG2	0.00966104	0.0219662	1.94004
ADAMTS19	0.0224333	0.0525752	1.93641
NFASC	0.0100353	0.0227542	1.93372
LINC02150	0.000865517	0.00371872	1.92923
COL4A2	0.0438841	0.108348	1.92601
CSMD3	0.00173103	0.00416094	1.9244
LINC01885	0.00161407	0.00352972	1.92409
PXDNL	0.0412407	0.100877	1.9221
MYL9	0.0236497	0.0551392	1.92014
HS3ST3A1	0.000631594	0.00147335	1.91997
PROX1-AS1	0.00126319	0.0036477	1.91919
LINC01088	0.0098014	0.0220102	1.91574
FHIT	0.256357	0.974352	1.9152
MAMDC2	0.0201876	0.0464952	1.91505
CLMN	0.0271351	0.0636877	1.91488
AC108734.4	0.102108	0.29043	1.91042
AL163541.1	0.00187139	0.00869866	1.90827
RERG	0.00739199	0.0164607	1.90459
HS6ST2	0.0142226	0.0320331	1.90451
CDH18	0.00264334	0.00577106	1.90064
NTRK3	0.00580131	0.0128324	1.89541
ROBO1	0.178507	0.590456	1.89468
RNF152	0.00622237	0.0137631	1.89461
NUP210L	0.0015439	0.00551834	1.89358
AC079793.1	0.000701771	0.00144987	1.89205
AATK	0.00161407	0.00446544	1.89168
LNX1	0.013591	0.0302962	1.88795
CPED1	0.401834	1.82009	1.88773
ERBB4	0.321505	1.31962	1.88762
MFAP5	0.0118833	0.0263863	1.8874
PIEZO2	0.0018246	0.00392668	1.88689
LINC01505	0.0359307	0.0850288	1.88662
AC100849.1	0.000608201	0.00173071	1.88611
LYN	0.00189478	0.00586803	1.88583
RAPGEF5	0.01055	0.023305	1.88244
SH2D2A	0.000374278	0.000748433	1.88048
STK32B	0.00783644	0.0172259	1.87963
PLD1	0.0117196	0.025899	1.87898
PREX2	0.0308779	0.0717517	1.87817
PDE1A	0.0131933	0.0292074	1.87678
ROBO2	0.00610541	0.0133669	1.87548
AC037486.1	0.00114623	0.00301637	1.8724
SLC8A1-AS1	0.00133336	0.00320305	1.86889
AL365295.1	0.00755573	0.0164817	1.86549
SGCZ	0.0021521	0.00458038	1.86068
TTTY14	0.20356	0.690433	1.85927
APBB2	0.0614517	0.153213	1.85809
TENM4	0.00928677	0.0201954	1.85645
LINC01091	0.0970783	0.264974	1.85607
DIAPH2	0.249246	0.907862	1.85526
RASGRP1	0.00109944	0.00254862	1.85459
FMN2	0.00140354	0.00294554	1.85444
BBOX1-AS1	0.00842125	0.0182691	1.85429
FAM135B	0.00116962	0.00261864	1.85397
ITGA4	0.00119301	0.00264198	1.85378
PTPRG	0.326908	1.32676	1.85331
ELMO1	0.0247959	0.0559492	1.85261
CALD1	0.054551	0.133077	1.85189
BICD1	0.030106	0.0688279	1.85141
XPO4	0.187537	0.615222	1.84895
NKAIN2	0.169922	0.539246	1.84664
AC084734.1	0.000187139	0.000374251	1.84464
DLG2	0.226344	0.790818	1.8445
PDGFRA	0.0221292	0.0493372	1.84364
AC021851.2	0.00339189	0.0072169	1.8431
WDPCP	0.181408	0.586745	1.84299
GGT7	0.245292	0.879243	1.83682
FAT3	0.00341528	0.00724014	1.83601
FGF10	0.00180121	0.00376301	1.83229
PLCL1	0.365927	1.54147	1.83157
MBNL1	1.23718	10.1469	1.83149
IL19	0.000163747	0.000350867	1.83067
LINC01482	0.00250298	0.00525714	1.83036
DLGAP1	0.00622237	0.0132952	1.83021
GSN	0.142249	0.423786	1.82945
BTBD11	0.00315797	0.00665701	1.82928
GRIA2	0.000912302	0.00184721	1.82653
AL356108.1	0.00140354	0.00289875	1.82499
GLUD2	0.000257316	0.000491185	1.82361
SLC35F3	0.00390652	0.00824243	1.82043
CADPS	0.0049124	0.0104091	1.82019
CCSER1	0.00954408	0.0203543	1.81999
AC016074.2	0.00149711	0.00308562	1.81751
AC106793.1	0.0121172	0.0259129	1.81696
AC010280.1	0.0213338	0.0467517	1.81613
NTNG1	0.00133336	0.00273519	1.81583
ITGA8	0.0120237	0.0256812	1.81504
THSD4	0.0582704	0.140635	1.81428
KCTD8	0.0417554	0.0964833	1.81316
ALDOA	2.31816	29.1974	1.80942
NAALADL2	0.124915	0.354752	1.80939
EPB41L2	0.0471824	0.110317	1.80818
AADACL2-AS1	0.000631594	0.00123943	1.80587
AC009478.1	0.00210531	0.00434665	1.80562
RELN	0.00210531	0.00434665	1.80562
CCDC73	0.000538024	0.00105239	1.80551
CHSY3	0.0378254	0.0860353	1.80401
SGCD	0.642471	3.51468	1.80336
SCML4	0.000678378	0.00133294	1.80231
AL050309.1	0.0106903	0.0226002	1.8011
NOTCH3	0.0203747	0.0441016	1.79878
ZC3H12B	0.00233924	0.00481347	1.7959
FSTL1	0.01717	0.0367128	1.7942
SLC35F1	0.115816	0.319444	1.79361
ZBTB20	0.979368	6.78848	1.7933
SLCO2A1	0.00100587	0.00203417	1.79252
LINC02542	0.00163747	0.0033659	1.7905
UBE2E2	0.348593	1.40388	1.78886
KCNMA1	0.174226	0.539776	1.78853
DSCAML1	0.0117897	0.0247978	1.78816
CRIM1	0.13088	0.370982	1.78265
NRXN3	0.0120237	0.0252133	1.78198
FLNA	0.0241643	0.0523542	1.78189
STAC	0.00465508	0.0096396	1.78052
GULP1	0.0310417	0.0683496	1.77894
LINC02694	0.00109944	0.00245505	1.77857
HSPG2	0.0761655	0.188687	1.77709
PFKFB1	0.188566	0.595325	1.77616
CPM	0.00514632	0.0106407	1.77465
LINC02391	0.00100587	0.00198739	1.77315
PTHLH	0.00039767	0.000912165	1.77244
SFRP2	0.000561417	0.00107576	1.77236
BCAS1	0.000608201	0.00116928	1.77214
EGFR	0.131629	0.37144	1.77185
TTN-AS1	1.9833	21.7812	1.77141
HCRTR2	0.000561417	0.00130969	1.77058
FLRT2	0.0689841	0.167109	1.77
TNFAIP8	0.00327493	0.00667965	1.76846
PBX1	0.349435	1.38912	1.76392
FER1L6-AS2	0.000374278	0.000701647	1.76293
AC110023.1	0.00650308	0.0133852	1.76263
DOCK9	0.0400009	0.0893983	1.76214
LINC01197	0.00505275	0.0103609	1.76056
RASGRF2	0.0123746	0.0256492	1.76022
AL049828.1	0.0195794	0.041373	1.76021
NOS1	0.267188	0.948306	1.75996
MEOX2	0.0161875	0.0338448	1.75931
LINC02388	0.00467847	0.0095692	1.75852
ACTA2	0.0150647	0.0313535	1.75628
AGAP2	0.00598844	0.0122688	1.7552
RBMS3	0.278697	1.00252	1.75426
SLC16A10	0.1888	0.588921	1.75415
PTGER3	0.00142693	0.00282851	1.75063
CA8	0.00654986	0.0133846	1.74987
TAGLN	0.0177782	0.0370658	1.74629
PTGIS	0.00881892	0.0180049	1.74412
GREB1L	0.0971485	0.249124	1.74348
AL358777.1	0.000327493	0.000842037	1.74321
COL12A1	0.0181057	0.037709	1.74272
GREM1	0.00238602	0.00476646	1.74267
IGFN1	0.0462467	0.103901	1.74165
KCND3	0.079651	0.195045	1.74098
LINC00989	0.00507614	0.0102905	1.74039
RBFOX1	0.551077	2.6833	1.74012
EGF	0.178718	0.543104	1.74002
DCHS2	0.00189478	0.00376267	1.73975
AL591501.1	0.0135676	0.0278406	1.73802
AP001341.1	0.000631594	0.00119264	1.7377
ADAMTSL2	0.00570774	0.0115703	1.73723
GBE1	0.241713	0.81448	1.73628
ENOX1	0.056937	0.130987	1.73557
EGFL7	0.0199537	0.0415921	1.73439
NAV1	0.0229947	0.048339	1.7343
SPECC1	0.0117196	0.0238872	1.73303
AC011124.2	0.000701771	0.00140308	1.73229
SORBS2	0.0116494	0.0237251	1.73186
DCLK1	0.0157431	0.0323385	1.73047
SLC24A3	0.1044	0.270447	1.73029
CNTN4	0.00891249	0.0180501	1.72987
THRB	0.212496	0.680586	1.72953
FIGN	0.0189946	0.0393604	1.7292
AC025470.2	0.00109944	0.00212755	1.72846
UTRN	0.111418	0.293121	1.72825
SOX2-OT	0.0251	0.0528696	1.72801
TOGARAM2	0.00563756	0.0113606	1.72717
ADAMTS17	0.0556036	0.126762	1.72591
LDHAL6A	0.000538024	0.00156704	1.72502
FN1	0.0427144	0.0940864	1.72385
LRRC7	0.0181525	0.0373798	1.72281
SEMA5A	0.0131231	0.0266594	1.7225
LINC01239	0.00652647	0.0131276	1.72246
GALNT18	0.0177314	0.0364125	1.72028
AC099489.1	0.00327493	0.0064925	1.71891
GLDN	0.00198835	0.00390266	1.71812
GPRIN3	0.00683057	0.0137084	1.71783
EMILIN2	0.00226906	0.0044629	1.71779
AL450332.1	0.000771948	0.00175387	1.71773
SLC38A11	0.00240941	0.00474295	1.71686
CSGALNACT1	0.0127956	0.0258726	1.71567
LINC01322	0.00311118	0.00614265	1.71384
HS3ST4	0.00039767	0.000725022	1.71031
ADGRB3	0.0131699	0.0265646	1.71009
SDK1	0.0313224	0.0663203	1.70942
AC092422.1	0.00196496	0.00383258	1.70768
NRK	0.0015439	0.00299191	1.70732
PTPRD	0.0114155	0.0228883	1.70576
AC003044.1	0.000654986	0.001216	1.70567
GLIS3	0.0258018	0.0537228	1.70489
TP63	0.242509	0.803287	1.70471
STXBP6	0.0135442	0.0272564	1.70459
FREM1	0.00662004	0.0131732	1.70382
GAS7	0.0197198	0.0403382	1.70324
AL157388.1	0.00694753	0.0138237	1.70273
GAS2	0.0849611	0.206031	1.7007
AC079142.1	0.0424337	0.0919581	1.69732
PDZRN3	0.245035	0.809213	1.69297
AC138123.1	0.0198601	0.0403794	1.69222
AC068587.4	0.00619898	0.0122428	1.69172
UNC13B	0.235748	0.766542	1.69111
MRVI1	0.00839786	0.0166086	1.69049
LINC02133	0.000654986	0.00163707	1.68879
MYO10	0.0237666	0.0487474	1.68868
MME	0.0251702	0.0518133	1.68845
LINC02224	0.00687735	0.0135674	1.68844
LINC01099	0.000444455	0.000912126	1.68802
CFAP47	0.000444455	0.000912126	1.68802
FMNL2	0.117243	0.305146	1.68697
NRP1	0.0695923	0.160849	1.68616
ADCY2	0.466444	2.02407	1.68542
IL16	0.00746216	0.0147052	1.68539
COL4A3	0.210063	0.652841	1.68505
AUTS2	0.139746	0.381472	1.68495
AL138963.4	0.677981	3.56464	1.68323
PRELID2	0.0170296	0.0341443	1.68312
EPHA3	0.0033685	0.00653867	1.6818
PAMR1	0.00159068	0.00303855	1.68143
PTPRM	0.344078	1.29494	1.6812
TNC	0.00107605	0.006081	1.68012
AC023095.1	0.00970783	0.0191113	1.67967
MSC-AS1	0.0209362	0.0423473	1.67817
SLC16A9	0.00516971	0.0101024	1.67712
MCF2L	0.0151349	0.0300647	1.676
SETBP1	0.367962	1.42182	1.67592
AC132803.1	0.000678378	0.00123936	1.67579
AC243829.2	0.000678378	0.00123936	1.67579
AC110491.3	0.000327493	0.000608108	1.6756
LINC00970	0.000327493	0.000608108	1.6756
AF123462.1	0.000327493	0.000608108	1.6756
LUCAT1	0.00842125	0.0164913	1.67384
PALLD	0.518749	2.35586	1.67363
PRDM6	0.00116962	0.00219757	1.67266
ARHGEF28	0.00467847	0.00910135	1.67254
AC002377.1	0.000631594	0.00114585	1.66954
RNF217-AS1	0.0584809	0.129686	1.66605
RCAN2	0.317621	1.14469	1.66593
LINC01949	0.00049124	0.0011928	1.66422
AC138305.1	0.000421062	0.000748396	1.66359
RASSF3	0.109008	0.274493	1.66358
RFX8	0.000842125	0.00154322	1.66142
GCNT2	0.012281	0.024014	1.66085
ITIH5	0.0233924	0.0471275	1.66033
IGFBP7	0.0373108	0.0778396	1.65698
COL20A1	0.000654986	0.00280672	1.65611
AC069277.1	0.00318136	0.00607203	1.65601
EYA4	0.300639	1.05161	1.6543
CCND3	0.0138951	0.0271298	1.65234
IMMP2L	0.297925	1.03602	1.65075
TIMP3	0.0443753	0.0940119	1.65046
VAV3	0.00456151	0.00875153	1.65025
ACAN	0.000257316	0.000444399	1.64991
LINC01517	0.000725163	0.00240894	1.64865
SNAP91	0.000818733	0.00292344	1.64846
RANBP3L	0.00140354	0.00261804	1.64825
PLEKHA5	0.0103628	0.0200339	1.64794
ADH1B	0.0162109	0.0317153	1.64613
AC079304.1	0.000374278	0.000654861	1.64538
KCNE5	0.00196496	0.00369222	1.64514
DPP6	0.0188776	0.0371425	1.64246
CACNA2D3	0.198087	0.587644	1.6415
ENTHD1	0.000701771	0.0033213	1.64092
NEK10	0.145454	0.390932	1.6397
ENG	0.0169127	0.0330021	1.63863
AC022034.3	0.00049124	0.000865296	1.63837
ADAMTS10	0.00577791	0.0110315	1.63604
LINC00426	0.000280708	0.000561351	1.6348
COL3A1	0.0343166	0.0700537	1.6347
AC109492.1	0.000818733	0.00147308	1.63413
PDE7B	0.069756	0.156311	1.63406
CREB5	0.0538258	0.115635	1.63386
PACRG	0.029989	0.0604836	1.63378
DYNC1I1	0.0124447	0.0239398	1.63342
USP54	0.21149	0.63832	1.63257
NHS	0.0049124	0.00933303	1.63202
COL5A2	0.0187139	0.0365638	1.63184
AC068286.2	0.00189478	0.00352874	1.63159
XACT	0.00112283	0.00537911	1.63158
ZBTB7C	0.0134974	0.0259945	1.6315
PRKD1	0.0175209	0.0340572	1.62937
LDHC	0.000350885	0.000818629	1.6286
MALRD1	0.0271351	0.0541434	1.62792
DKK2	0.00528667	0.010031	1.62778
KCNB1	0.0322581	0.0651847	1.62741
SLC8A3	0.150834	0.406649	1.62715
PAPPA	0.00619898	0.011775	1.62708
MIR646HG	0.0184332	0.0358256	1.62464
PTCH1	0.00687735	0.0130527	1.6244
NCMAP	0.000444455	0.000771768	1.62175
AL353660.1	0.000444455	0.000771768	1.62175
PRAM1	0.000444455	0.000771768	1.62175
TMEM164	0.0896863	0.209885	1.62131
AC093802.1	0.00049124	0.00147351	1.61997
FRMD4A	0.0232754	0.045706	1.61885
AC005323.1	0.0945987	0.223623	1.61746
LINC01681	0.0435332	0.0901091	1.61625
SORCS1	0.00659665	0.0124483	1.61582
DAB1	0.0638378	0.139253	1.61538
CD248	0.00425741	0.00798225	1.61475
LINC00924	0.00283048	0.00525539	1.61446
TMEM178B	0.0356266	0.0720207	1.61297
COL4A1	0.0393927	0.0803701	1.6113
ANKS1B	0.0875108	0.202387	1.61126
LINC02613	0.0347844	0.0700682	1.61096
CPA6	0.00126319	0.00229091	1.60866
RASAL2	0.0442817	0.0914002	1.6084
EPCAM	0.000257316	0.000537971	1.60791
TMEM244	0.000257316	0.000537971	1.60791
LINC02197	0.000257316	0.000537971	1.60791
CHGB	0.000257316	0.000537971	1.60791
AC092979.1	0.000257316	0.000537971	1.60791
AC002429.2	0.00264334	0.00488213	1.60788
FRMD4B	0.00867857	0.0163231	1.60714
THEMIS	0.00100587	0.00180024	1.60618
IKBKE	0.000187139	0.000327466	1.60331
HAP1	0.000187139	0.000327466	1.60331
SLC9C2	0.000210531	0.000350849	1.60285
AC124067.4	0.000210531	0.000350849	1.60285
AP000696.1	0.000210531	0.000350849	1.60285
NEBL	0.00437437	0.00814499	1.6028
NAV2	0.0241175	0.0469761	1.60214
HECW2	0.00739199	0.0138407	1.60145
AC027013.1	0.000631594	0.00109907	1.60137
TRPM2	0.00500597	0.0093321	1.60082
AC011246.1	0.00376617	0.00698029	1.60069
TEK	0.0115792	0.0217851	1.60009
NEU4	0.00039767	0.000678236	1.59995
STYK1	0.00039767	0.000678236	1.59995
RALGAPA2	0.329832	1.15938	1.59907
AC034195.1	0.00830429	0.0155341	1.59907
PLIN5	0.0749257	0.166254	1.59677
SLC7A14-AS1	0.0021521	0.00392538	1.5946
LAMA4	0.0190648	0.0364336	1.59439
CCDC26	0.00301761	0.00553501	1.59311
ANGPT1	0.0867155	0.197659	1.59133
AC073050.1	0.0170998	0.0323875	1.58964
OR3A2	0.00102926	0.00182359	1.58816
CDH17	0.000280708	0.000467779	1.5869
PTPRR	0.000701771	0.00121594	1.58678
AC106798.1	0.00119301	0.00212733	1.58585
TSBP1-AS1	0.00283048	0.00516182	1.58572
PTPRE	0.00860839	0.0159734	1.58569
FKBP5	0.398887	1.51203	1.58516
MAML3	0.0329598	0.0649518	1.58404
ITGA1	0.023135	0.0444025	1.58281
LINC00639	0.00327493	0.00597786	1.58266
SGIP1	0.00785983	0.0145354	1.58131
IGF1	0.0132401	0.024668	1.57932
ARPP21	0.169454	0.459448	1.57908
TACC1	0.0437671	0.088498	1.57785
CDH8	0.00292405	0.00530164	1.57566
DISC1	0.0158834	0.029714	1.57542
AC104435.2	0.000233924	0.000514589	1.57508
DISC1FP1	0.0054972	0.0100989	1.57503
LAMB1	0.0155559	0.0290693	1.575
APCDD1	0.00598844	0.0110056	1.57448
AC112206.2	0.0166788	0.0312321	1.57355
UST	0.0119769	0.0221734	1.57338
LINC01697	0.00374278	0.00681672	1.57322
CADPS2	0.0126085	0.0233509	1.57204
TMEM132C	0.00456151	0.00833046	1.57085
AMPH	0.00596505	0.0109357	1.57065
RIPOR3	0.00945051	0.0173618	1.56798
AL359232.1	0.0175911	0.0329085	1.56781
MGLL	0.0587382	0.122474	1.56542
RBM47	0.00145033	0.00257112	1.56485
MUSK	0.00444455	0.00807419	1.56333
PCED1B	0.00608201	0.011098	1.56316
TMTC2	0.0088891	0.0162492	1.56144
AC083870.1	0.0260825	0.0497314	1.56004
MMP27	0.000421062	0.00070161	1.55959
KCNH5	0.000421062	0.00070161	1.55959
GUCY1A1	0.00977801	0.0178701	1.55916
PCSK5	0.00994175	0.018171	1.55896
MIR99AHG	0.226625	0.669235	1.55828
MLIP	0.483333	1.97271	1.55796
PRICKLE1	0.0124447	0.022817	1.55681
ADAMTSL3	0.0123512	0.0226321	1.55618
FOXP2	0.288685	0.933946	1.55557
DAPK2	0.245222	0.744136	1.55518
TNNT2	0.00107605	0.00187027	1.5543
AC000113.1	0.000163747	0.000304081	1.55378
COL8A1	0.00790662	0.0143475	1.5516
NTN4	0.0115324	0.0210376	1.55159
PHLDB2	0.0167723	0.0309482	1.55014
ALDH1A2	0.00608201	0.0110045	1.54998
AC002069.2	0.00049124	0.00081851	1.54979
CNTN3	0.000678378	0.00114579	1.54927
HTR2A	0.000678378	0.00114579	1.54927
MYH6	0.0346909	0.067174	1.54898
COL6A2	0.0540364	0.110021	1.54766
C8orf34	0.00332172	0.00593076	1.54751
TENM1	0.00638611	0.0115387	1.54747
PPARG	0.00594166	0.0107254	1.54655
CHRDL2	0.00315797	0.00562772	1.54644
AC064807.2	0.00177782	0.00313149	1.54536
PLEKHH2	0.0042808	0.00767794	1.54454
MIR181A1HG	0.00236263	0.00418175	1.54439
MEIS2	0.0114856	0.0208515	1.54427
PPM1L	0.180776	0.488981	1.54303
DOCK5	0.013474	0.0245214	1.5418
SMYD3	0.116658	0.277094	1.54162
ZNF831	0.000561417	0.000935401	1.54111
PHEX	0.000561417	0.000935401	1.54111
DOCK8	0.00902945	0.0162935	1.54102
BMPR1B	0.0258252	0.0485985	1.54078
FHOD3	0.125173	0.302826	1.5405
SVEP1	0.0100353	0.0181224	1.54009
FER1L6	0.000748556	0.00126266	1.5399
GNA14	0.00538024	0.00965572	1.53916
SHANK3	0.0216379	0.0402121	1.53883
RAI14	0.00601184	0.0107948	1.53828
CASC15	0.0157431	0.028736	1.5377
LINC02763	0.00168425	0.00294467	1.53634
AC116345.1	0.00133336	0.00231412	1.53629
COL6A6	0.00451473	0.00805017	1.53401
ATXN1	0.27872	0.876533	1.53363
SLC9A9	0.0212169	0.0392476	1.53353
KCNN2	0.0501064	0.100091	1.5335
AC092652.2	0.000233924	0.000374232	1.53338
UNC5CL	0.000233924	0.000374232	1.53338
AC005154.4	0.000233924	0.000374232	1.53338
AP003100.2	0.000233924	0.000374232	1.53338
AL157778.1	0.000233924	0.000374232	1.53338
AL121999.1	0.000631594	0.00105228	1.5332
CAMKMT	0.079534	0.17146	1.53317
LEF1	0.000304101	0.000491159	1.53296
NRG2	0.0618494	0.127315	1.53245
RALYL	0.00187139	0.0032715	1.53193
CD36	0.190437	0.52018	1.53165
MIR3681HG	0.0015205	0.00264109	1.53101
NTM	0.00561417	0.0100274	1.53091
ITGAM	0.00116962	0.00201042	1.53021
NR2F1-AS1	0.00217549	0.00380831	1.53012
GRIK4	0.00357903	0.00632667	1.5289
MSI2	0.346955	1.19084	1.52768
B3GALT5	0.00495918	0.00881792	1.52714
PLS3-AS1	0.000701771	0.00116915	1.52572
ATP10A	0.00400009	0.00707205	1.52453
MTUS2	0.00135676	0.00233745	1.52409
TNIK	0.241082	0.712253	1.52383
MAGI1	0.0969613	0.217205	1.52374
LINC00824	0.000444455	0.000724983	1.52344
SAMSN1	0.000444455	0.000724983	1.52344
TRPV5	0.00112283	0.00191696	1.52318
AC006299.1	0.0139652	0.0251395	1.52316
CFAP54	0.0012398	0.00212722	1.52313
AC027271.1	0.000163747	0.000257295	1.52274
PTGDS	0.0378956	0.0727194	1.52168
AQP1	0.017825	0.0323855	1.52157
TMEM163	0.00166086	0.00287457	1.52152
ROR1	0.042808	0.083224	1.52111
PPP2R2B	0.00196496	0.0034115	1.52006
PRKN	0.302627	0.975248	1.51996
CEACAM1	0.00280708	0.00490463	1.51948
AC073475.1	0.0887974	0.194276	1.51923
SERPINE1	0.000701771	0.00435059	1.5189
AC004784.1	0.000514632	0.00084188	1.51865
MAGI2	0.0645863	0.132513	1.51639
FGF14	0.00416384	0.00732803	1.51635
LSAMP	0.00294744	0.00513775	1.51462
LTBP4	0.0326791	0.0614145	1.5118
EPHB1	0.0612646	0.124182	1.51138
EPAS1	0.0365623	0.0694267	1.51122
TSC22D1	0.279422	0.866597	1.51092
NCKAP5	0.0141056	0.0251823	1.51005
CACNA2D1	0.81492	4.26283	1.50969
PRTFDC1	0.00254977	0.00441476	1.50832
KANSL1L	0.0809142	0.172151	1.50774
KEL	0.00261994	0.00453136	1.50593
CCBE1	0.00201174	0.0034581	1.50442
KCNT2	0.00465508	0.00814245	1.50398
PIK3R3	0.00940373	0.0165673	1.50376
FRAS1	0.0695455	0.143311	1.5035
GFRA1	0.0112517	0.0198743	1.50317
AC002460.2	0.00573113	0.0100495	1.50267
ZNF536	0.012164	0.0215139	1.50258
ABI3BP	0.0146904	0.0261246	1.50204
LDLRAD3	0.0107605	0.0189728	1.50196
OPN4	0.00208192	0.00357478	1.50194
ADAMTSL1	0.0049124	0.00858446	1.50112
AC107223.1	0.0188542	0.0338917	1.50068
AL445426.1	0.00509953	0.00891008	1.4999
LDLRAD4	0.178694	0.467997	1.49965
NYAP2	0.0169595	0.0302869	1.49946
DLEU2	0.218625	0.613192	1.49935
GHR	0.323493	1.05702	1.49877
PRX	0.00332172	0.00574362	1.49868
FBXO32	0.887085	4.8414	1.49865
DNAH8	0.00079534	0.00130937	1.4979
AC098829.1	0.00308779	0.00532405	1.49692
C5orf47	0.00039767	0.00254967	1.49674
KCNB2	0.000982479	0.00163654	1.4966
EPB41L4A	0.0169361	0.0301707	1.49587
TMEM161B-AS1	0.158436	0.398239	1.49467
LZTS1	0.00210531	0.00359808	1.49466
MPPED2	0.0247023	0.0449124	1.49316
PLCL2	0.291305	0.907583	1.49259
MCTP2	0.000865517	0.00142622	1.49135
AC117464.1	0.000467847	0.000748354	1.4908
GNGT1	0.000467847	0.000748354	1.4908
CLIP1-AS1	0.000467847	0.000748354	1.4908
CNTNAP4	0.000467847	0.000748354	1.4908
ASXL3	0.000538024	0.000865248	1.49018
PPP1R1C	0.0173805	0.0308807	1.48996
LINC00382	0.00039767	0.00063145	1.48958
BTNL8	0.00039767	0.00063145	1.48958
NRP2	0.00378956	0.00653565	1.48922
COBLL1	0.0157665	0.0278697	1.48904
F8	0.0165852	0.0293637	1.48816
FAM198B-AS1	0.00385974	0.00665208	1.48745
TTC28	0.105546	0.235655	1.48723
SLC14A2	0.00374278	0.00644243	1.48684
PLA2G12B	0.000140354	0.000280695	1.4868
AC006960.2	0.000140354	0.000280695	1.4868
AC092353.1	0.000327493	0.000514537	1.48624
SLC6A2	0.000327493	0.000514537	1.48624
FBXO15	0.000327493	0.000514537	1.48624
HAS2	0.00112283	0.00187017	1.486
AL132857.1	0.00112283	0.00187017	1.486
STEAP4	0.0118833	0.020772	1.48581
FBLN1	0.0131231	0.0229634	1.48369
AC073529.1	0.00327493	0.00560357	1.48356
FBLN2	0.0276966	0.0504166	1.48299
PLXNA4	0.00516971	0.00893276	1.48294
NKD1	0.000748556	0.00121587	1.48285
SLFN12L	0.00138015	0.00231399	1.48236
DPF3	0.228192	0.642486	1.482
AC002066.1	0.00297083	0.00506743	1.48192
RHOBTB1	0.294744	0.915931	1.48165
GNG12-AS1	0.019135	0.0339746	1.48101
LPAR1	0.00870196	0.0150829	1.48099
RUNX1T1	0.0481181	0.0923557	1.48083
PHACTR1	0.00636272	0.011001	1.48081
CPE	0.0094973	0.016472	1.4802
SUMF1	0.0644927	0.12911	1.47995
PDE11A	0.016632	0.0292686	1.47897
ABLIM2	0.270767	0.811754	1.47887
LINC00882	0.0283515	0.0515495	1.47885
AC098617.1	0.00378956	0.00648887	1.47856
AC021613.1	0.00247959	0.00420457	1.47799
RHOJ	0.0122576	0.0213244	1.47772
NEURL1B	0.0115792	0.0201008	1.47638
LINC00636	0.000257316	0.000397613	1.47621
TIGIT	0.000257316	0.000397613	1.47621
AC021733.4	0.000257316	0.000397613	1.47621
AC025262.1	0.000257316	0.000397613	1.47621
AP3B2	0.000257316	0.000397613	1.47621
AC013565.1	0.000257316	0.000397613	1.47621
AP005203.1	0.000257316	0.000397613	1.47621
FCER2	0.000257316	0.000397613	1.47621
AC092832.2	0.000257316	0.000397613	1.47621
AKAP14	0.000257316	0.000397613	1.47621
FAM221B	0.000257316	0.000397613	1.47621
SNTG2-AS1	9.35694e-05	0.000140349	1.47498
CD8B2	9.35694e-05	0.000140349	1.47498
AC084277.1	9.35694e-05	0.000140349	1.47498
AC107220.1	9.35694e-05	0.000140349	1.47498
AC010132.1	9.35694e-05	0.000140349	1.47498
AC004870.2	9.35694e-05	0.000140349	1.47498
TRBV15	9.35694e-05	0.000140349	1.47498
AC104051.2	9.35694e-05	0.000140349	1.47498
AC011124.1	9.35694e-05	0.000140349	1.47498
AP001330.4	9.35694e-05	0.000140349	1.47498
CYSRT1	9.35694e-05	0.000140349	1.47498
AL133353.1	9.35694e-05	0.000140349	1.47498
CTSW	9.35694e-05	0.000140349	1.47498
KCNA1	9.35694e-05	0.000140349	1.47498
CPNE7	9.35694e-05	0.000140349	1.47498
AC009271.2	9.35694e-05	0.000140349	1.47498
AP001062.2	9.35694e-05	0.000140349	1.47498
AL354872.2	9.35694e-05	0.000140349	1.47498
LINC01995	9.35694e-05	0.000140349	1.47498
MUC5AC	9.35694e-05	0.000140349	1.47498
KLRB1	9.35694e-05	0.000140349	1.47498
AMELY	9.35694e-05	0.000140349	1.47498
FMR1-IT1	9.35694e-05	0.000140349	1.47498
STAT4	0.001848	0.00310784	1.4741
FOXO1	0.150717	0.367548	1.47217
FAM160A1	0.207326	0.56006	1.4714
HS3ST5	0.078879	0.162862	1.47084
LTBP2	0.0122108	0.0211384	1.47057
TCF4	0.201595	0.538801	1.46999
PPM1E	0.000959087	0.0015664	1.46916
LINC01358	0.0245386	0.0438678	1.46881
GRIK2	0.0252637	0.0452118	1.4675
CD74	0.0282346	0.0509245	1.4674
EEPD1	0.124751	0.287211	1.46736
HTR7	0.00187139	0.00313115	1.46621
STEAP1B	0.0252871	0.0451873	1.46525
SCN1A-AS1	0.00135676	0.00224388	1.46308
GDNF	0.0357669	0.065601	1.46287
GAPDH	12.2284	551.918	1.46259
STOX2	0.0236965	0.0420369	1.4608
SNED1	0.0905752	0.191384	1.46057
FYN	0.0168425	0.029285	1.46042
SESN1	0.356383	1.18306	1.46032
DGKB	0.00657325	0.0112088	1.46015
COLGALT2	0.020866	0.0367125	1.46006
CCDC192	0.014784	0.0255604	1.45997
GRID1	0.00804697	0.0137371	1.45956
RIMS2	0.00116962	0.00191685	1.45899
DIPK2B	0.00975461	0.0166776	1.45865
VLDLR-AS1	0.0241877	0.042879	1.45789
ITGA11	0.00839786	0.0143161	1.45715
MYL2	9.67852	342.95	1.45619
MCTP1	0.00783644	0.0133427	1.4559
LINC01725	0.00217549	0.00362117	1.45493
ZFPM2	0.312452	0.976551	1.45471
AC119674.1	0.080961	0.166202	1.45462
IQCJ-SCHIP1	0.0073452	0.0124846	1.45379
C15orf41	0.0993707	0.213621	1.45358
SPATA6	0.0131465	0.0225183	1.45227
HULC	0.0181291	0.0314623	1.45205
APOE	0.0117196	0.0200039	1.4513
TCAP	5.54932	115.404	1.4491
RFX7	0.142974	0.337703	1.44829
AL133244.2	0.000187139	0.00028068	1.44781
AC093791.2	0.000187139	0.00028068	1.44781
AP000787.1	0.00463169	0.00779178	1.44661
2024-12-01	0.00119301	0.00194019	1.44634
MYOCD	0.00119301	0.00194019	1.44634
HIVEP3	0.0471122	0.088077	1.44606
TRERF1	0.0106435	0.018063	1.44596
MYOC	0.00982479	0.0166528	1.44594
PLAC8	0.000350885	0.000537914	1.44564
SOAT2	0.000350885	0.000537914	1.44564
EFNA2	0.000350885	0.000537914	1.44564
AC008050.1	0.00180121	0.00296765	1.44501
KCNJ3	0.00484222	0.00814068	1.44452
COL6A1	0.0443987	0.08229	1.44382
HHIP	0.00194157	0.00320106	1.44377
COL5A3	0.010433	0.0176698	1.44354
AL162414.1	0.000654986	0.00102886	1.44317
PDGFD	0.00556738	0.00937295	1.44315
IGFBP6	0.0275562	0.0487868	1.44288
LINC01117	0.00472526	0.00793126	1.44283
ADGRL4	0.0115792	0.0196329	1.44202
DTNA	0.436221	1.56768	1.44141
AC104596.1	0.0320007	0.0571775	1.43997
AGTR1	0.00442116	0.007396	1.43973
C8orf37-AS1	0.00921659	0.0155415	1.43966
MAP1B	0.023135	0.040379	1.43939
VCAN	0.0107605	0.0181775	1.439
SASH1	0.0349014	0.0627849	1.4382
PRAG1	0.0188776	0.0325107	1.43764
TSPAN18	0.0120471	0.0203704	1.43684
LIX1-AS1	0.00867857	0.014592	1.4367
ATP2B4	0.0303399	0.0538423	1.43631
CXCL14	0.0330066	0.0589133	1.43455
ABTB2	0.0590189	0.11285	1.43444
CATSPERB	0.00327493	0.00541643	1.43402
COL21A1	0.0139418	0.0236196	1.43356
DEPTOR	0.34609	1.11295	1.4329
MYO1D	0.0127488	0.0215227	1.43259
DOCK4	0.0790896	0.159062	1.43193
PTCHD4	0.00149711	0.00243062	1.4317
AF165147.1	0.0236497	0.0411034	1.43137
NR6A1	0.0382231	0.0690452	1.43115
ANKFN1	0.00435098	0.00723287	1.43111
ARHGAP44	0.00509953	0.00848901	1.42901
PRR16	0.0806569	0.162531	1.42897
MAP3K7CL	0.0138015	0.023296	1.4288
AC010148.1	0.000280708	0.000420994	1.42818
C1QL3	0.000280708	0.000420994	1.42818
AP001961.1	0.000280708	0.000420994	1.42818
AC097528.1	0.000280708	0.000420994	1.42818
AC063979.2	0.000280708	0.000420994	1.42818
ASAH2	0.000280708	0.000420994	1.42818
LINC01481	0.000280708	0.000420994	1.42818
AL161757.4	0.000280708	0.000420994	1.42818
AL031073.2	0.00140354	0.023157	1.42717
PAWR	0.0055206	0.00918633	1.42655
SLC14A2-AS1	0.000818733	0.00128594	1.42653
HEPH	0.000818733	0.00128594	1.42653
AC023480.1	0.00512293	0.00851217	1.42625
AL139383.1	0.0333107	0.0591505	1.42596
LINC01473	0.0543405	0.101964	1.42519
LMCD1-AS1	0.0367728	0.0658789	1.42497
ALPK2	0.0617792	0.118224	1.42491
P2RY14	0.00385974	0.00637137	1.42468
PECAM1	0.0193923	0.033146	1.4246
BBS9	0.0496854	0.0920854	1.42431
PRKCA	0.0875342	0.178919	1.42396
LINC01807	0.00222227	0.00362096	1.42366
CLVS1	0.00222227	0.00362096	1.42366
AC068633.1	0.00116962	0.00187006	1.42338
EXT1	0.0547615	0.102714	1.42309
SMAD3	0.17977	0.447541	1.42274
FSTL4	0.0012398	0.00198686	1.42263
AC011346.1	0.0236731	0.0408918	1.4225
MYO1F	0.00145033	0.00233719	1.42247
IKZF1	0.00130997	0.00210365	1.42241
ZBTB46	0.0129594	0.0217278	1.42212
ITGB4	0.00320475	0.00525313	1.42198
SPARCL1	0.0859669	0.174583	1.42054
BTBD9	0.0912068	0.187737	1.42052
GSE1	0.141804	0.327603	1.41997
ST8SIA1	0.00444455	0.00732562	1.41839
CASS4	0.000608201	0.000935346	1.4176
CMIP	0.00935694	0.0155389	1.41756
ERG	0.0102926	0.0171112	1.41728
LINC02408	0.00486561	0.00802349	1.41676
TENM3	0.0458256	0.083635	1.41637
PI16	0.00706449	0.0116933	1.4162
SPIDR	0.0464572	0.0849101	1.41609
HDAC8	0.0614985	0.116855	1.4159
LANCL1-AS1	0.128284	0.287183	1.41583
HTRA3	0.0157898	0.0265356	1.41557
ANK3	0.157337	0.373719	1.41545
FAP	0.00797679	0.0132001	1.41491
PLAT	0.00168425	0.00271074	1.41429
LINC01483	0.00325154	0.00529962	1.41344
CRADD	0.0743175	0.145665	1.41268
MEIKIN	0.00133336	0.00212698	1.41205
LINC02208	0.00126319	0.00201019	1.41154
AC025244.1	0.000374278	0.00205844	1.4115
DENND2A	0.0128658	0.0214027	1.41131
AC006148.1	0.000982479	0.00154297	1.41103
TRG-AS1	0.000374278	0.00056129	1.41027
AP002989.1	0.000374278	0.00056129	1.41027
ENO4	0.000374278	0.00056129	1.41027
HLCS	0.0827388	0.165349	1.4096
CDH1	0.000538024	0.000818462	1.4096
GNG4	0.000538024	0.000818462	1.4096
DNAH11	0.00299422	0.00485676	1.40902
PLCB1	0.219116	0.578005	1.40901
DLEU1	0.0186671	0.0314659	1.40804
SH3RF1	0.0302931	0.0526755	1.40752
LINC01340	0.00257316	0.00415732	1.40721
L3MBTL4	0.0173805	0.0291496	1.40644
ADGRG4	0.000584809	0.00484199	1.40637
VIT	0.01455	0.0242105	1.40589
MTMR8	0.00657325	0.0107877	1.4053
COL5A1	0.0186905	0.0314416	1.40509
ACOT11	0.0691712	0.13307	1.40497
TPM1	9.94772	349.432	1.40455
PELI2	0.0200706	0.0338912	1.40453
SGO1-AS1	0.00287726	0.00464691	1.40393
ST6GAL1	0.0121172	0.0200179	1.40361
RNF150	0.0653816	0.12441	1.40341
AC062004.1	0.00142693	0.00226708	1.40315
MYLK	0.00778966	0.012782	1.40313
TNNT1	6.45267	149.162	1.40312
RC3H1	0.173969	0.422597	1.40299
AL078604.4	0.0295679	0.0511515	1.40284
RABGAP1L	0.0647968	0.123012	1.40231
COLEC12	0.0091932	0.0150975	1.40213
COMMD10	0.125828	0.277444	1.40201
FMO2	0.0167957	0.0280233	1.40158
CCR3	0.00640951	0.0104857	1.40109
KIAA0825	0.0140354	0.0232427	1.40095
TCF7L1	0.0260591	0.0446096	1.40071
AC091078.1	0.0303399	0.0524855	1.40011
MYRIP	0.0133103	0.0219759	1.39932
GMDS-DT	0.0759784	0.148106	1.39899
PDE8B	0.00107605	0.00168313	1.39878
AL157829.1	0.00107605	0.00168313	1.39878
MAPRE2	0.148495	0.342457	1.39838
COL1A2	0.0357201	0.0626101	1.39818
GLYATL2	0.00166086	0.00264064	1.3977
LINC02798	0.000935694	0.00144948	1.39536
AC006206.2	0.000935694	0.00144948	1.39536
AC104123.1	0.013591	0.0223894	1.39523
TNNI2	6.36962	144.62	1.39478
BNC2	0.181384	0.44394	1.39467
NLGN4X	0.00145033	0.0022904	1.394
OBSCN	1.92201	16.2334	1.39374
XAF1	0.0144565	0.0238389	1.39359
MAP2	0.00615219	0.00999771	1.39204
LRFN5	0.00729842	0.0118771	1.39197
LINC02692	0.000116962	0.000257308	1.3914
AL158167.1	0.000116962	0.000257308	1.3914
AL132712.1	0.000116962	0.000257308	1.3914
TAF7L	0.000116962	0.000257308	1.3914
AC104667.1	0.000116962	0.000257308	1.3914
LINC01933	0.00451473	0.0073016	1.39136
BEND6	0.00130997	0.00205686	1.39077
COL22A1	0.00130997	0.00205686	1.39077
C14orf39	0.0413343	0.0731721	1.3907
AC099792.1	0.00509953	0.00825508	1.38963
SAMD12	0.00360242	0.00578846	1.38949
IGF1R	0.103652	0.215208	1.38933
LINC00607	0.0012398	0.00194007	1.38913
AC091912.3	0.0012398	0.00194007	1.38913
LINC02050	0.000210531	0.000304063	1.38911
AC079841.2	0.000210531	0.000304063	1.38911
PCDHA10	0.000210531	0.000304063	1.38911
POU2F3	0.000210531	0.000304063	1.38911
TPH2	0.000210531	0.000304063	1.38911
AC022816.1	0.000210531	0.000304063	1.38911
AC233976.1	0.000210531	0.000304063	1.38911
TNNI1	3.83653	55.4364	1.38882
SCARA5	0.0124213	0.0203145	1.38874
PSD3	0.0249596	0.0422094	1.38788
MYO18B	0.565113	2.22275	1.38755
IGF2	0.0107605	0.0175225	1.38715
DLGAP3	0.000304101	0.000444373	1.38694
GZMA	0.000304101	0.000444373	1.38694
GPR20	0.000304101	0.000444373	1.38694
IGLC1	0.000304101	0.000444373	1.38694
ANO4	0.0015439	0.00243048	1.38694
FNDC3B	0.136167	0.303649	1.38678
MCU	0.135559	0.301849	1.38652
SIPA1L1	0.0112517	0.0183304	1.3864
FBLN5	0.0113921	0.0185612	1.38618
ITGBL1	0.00940373	0.0152573	1.38486
PRIMA1	0.00102926	0.00158966	1.38444
MIR2052HG	0.00977801	0.0158584	1.38364
COLQ	0.0288194	0.0490431	1.3825
PRG4	0.00170764	0.00268727	1.38226
AC013287.1	0.00299422	0.00476319	1.38187
CHST9	0.00430419	0.00690577	1.38152
COL28A1	0.0337318	0.058093	1.38135
PODN	0.0138483	0.0225929	1.38083
SLCO3A1	0.0328429	0.0563743	1.38019
STK33	0.0169361	0.0278314	1.37989
LINC02519	0.00039767	0.000584665	1.37921
GPRC5A	0.00039767	0.000584665	1.37921
SUGCT	0.0699665	0.132398	1.37916
TMEM131L	0.141898	0.31836	1.37873
MATN2	0.00484222	0.00776639	1.37811
SPRY4-AS1	0.00210531	0.00331736	1.37805
AOAH	0.00210531	0.00331736	1.37805
CNKSR2	0.00346207	0.00550874	1.37754
AC005291.2	0.000654986	0.000982073	1.37754
CD72	0.00180121	0.0028273	1.37667
AC109927.1	0.00781305	0.0125711	1.37583
RYR1	2.25622	21.1707	1.37579
GADL1	0.101055	0.206453	1.3757
AP002026.1	0.00376617	0.00599779	1.37539
NLGN4Y	0.00863178	0.0138911	1.37519
DES	5.77688	118.23	1.37512
TBC1D8	0.113219	0.23786	1.37435
CXCL2	0.00142693	0.00222029	1.37419
APBA1	0.0139418	0.0226371	1.37393
CCDC3	0.00718145	0.0115279	1.37321
AP006261.1	0.00049124	0.000724939	1.37262
NXN	0.22328	0.577472	1.37214
TMTC1	0.149547	0.339126	1.37214
PRICKLE2	0.0120237	0.0194119	1.37196
PPP1R16B	0.00809376	0.0129877	1.37193
AL096799.1	0.00683057	0.010948	1.37192
BCL2	0.15046	0.341729	1.3718
NEO1	0.188425	0.459278	1.37162
FOXO3	0.181033	0.435482	1.37162
BOC	0.00912302	0.0146543	1.37158
ITIH4	0.0992304	0.201204	1.37149
EDNRA	0.00512293	0.00818467	1.37138
SLC25A21	0.0219654	0.0364081	1.37126
DOCK1	0.0267375	0.0448779	1.37084
KLF12	0.103769	0.212634	1.37078
NLRC5	0.00587148	0.00939287	1.37068
PVT1	0.0135676	0.0219456	1.37001
BCAS3	0.136003	0.299459	1.36976
UBXN10-AS1	0.000116962	0.000163737	1.36964
LINC01707	0.000116962	0.000163737	1.36964
LINC02785	0.000116962	0.000163737	1.36964
FMO1	0.000116962	0.000163737	1.36964
ZNF695	0.000116962	0.000163737	1.36964
ACOXL-AS1	0.000116962	0.000163737	1.36964
FBXW12	0.000116962	0.000163737	1.36964
AC098479.1	0.000116962	0.000163737	1.36964
LINC02068	0.000116962	0.000163737	1.36964
UCHL1-AS1	0.000116962	0.000163737	1.36964
AC114757.1	0.000116962	0.000163737	1.36964
AC092674.1	0.000116962	0.000163737	1.36964
PSD2	0.000116962	0.000163737	1.36964
ZNF165	0.000116962	0.000163737	1.36964
MYMX	0.000116962	0.000163737	1.36964
LINC02518	0.000116962	0.000163737	1.36964
AL353613.1	0.000116962	0.000163737	1.36964
AP002884.3	0.000116962	0.000163737	1.36964
ALX1	0.000116962	0.000163737	1.36964
AC127496.1	0.000116962	0.000163737	1.36964
AP001025.1	0.000116962	0.000163737	1.36964
PCP2	0.000116962	0.000163737	1.36964
NOX1	0.000116962	0.000163737	1.36964
SH2D1A	0.000116962	0.000163737	1.36964
LINC01776	0.000116962	0.000163737	1.36964
ADAMTS4	0.000116962	0.000163737	1.36964
AC092803.4	0.000116962	0.000163737	1.36964
AC096639.1	0.000116962	0.000163737	1.36964
LBX2-AS1	0.000116962	0.000163737	1.36964
AC099782.2	0.000116962	0.000163737	1.36964
LINC02569	0.000116962	0.000163737	1.36964
AC004690.2	0.000116962	0.000163737	1.36964
AC012574.1	0.000116962	0.000163737	1.36964
AC001226.1	0.000116962	0.000163737	1.36964
CDH16	0.000116962	0.000163737	1.36964
KCNJ4	0.000116962	0.000163737	1.36964
AC010320.1	0.000116962	0.000163737	1.36964
PPARGC1A	0.142436	0.317809	1.36963
C1orf21	0.473649	1.68274	1.36963
GDAP1	0.030761	0.0520855	1.36897
OPHN1	0.0436735	0.0765758	1.36857
KANK4	0.0015205	0.00236037	1.36828
LMF1-AS1	0.000982479	0.00149618	1.36824
GPHN	0.210695	0.532125	1.36791
PTP4A1	0.0064329	0.0102749	1.3679
FBXL17	0.274486	0.765256	1.36788
GPC3	0.00175443	0.00273389	1.36764
ADGRL2	0.0132401	0.0213462	1.36665
AC025887.2	0.0012164	0.00186995	1.36588
TC2N	0.00547381	0.00871898	1.36571
SUPT3H	0.0665045	0.123419	1.36472
CADM1	0.0337318	0.0573912	1.36466
SYCP2L	0.00254977	0.00399369	1.36446
BACH2	0.130132	0.281302	1.36168
CACNB4	0.00416384	0.00657946	1.36145
FHL5	0.00514632	0.00816103	1.36109
AQP4-AS1	0.00811715	0.0129172	1.36052
GMDS	0.0249596	0.0413673	1.36018
COL4A4	0.0896395	0.175926	1.35987
TSHZ3	0.00591827	0.00939231	1.3597
TBXAS1	0.00233924	0.00364382	1.35951
AC007364.1	0.0134038	0.0215056	1.3595
DGKH	0.0139652	0.0224259	1.35875
NOTCH4	0.0116026	0.0185329	1.35842
ADRA1B	0.00170764	0.00264048	1.3582
AC092650.1	0.00928677	0.0147683	1.35756
SPRED2	0.0149009	0.0239428	1.35645
SSBP2	0.156121	0.354451	1.35612
PRKCE	0.0538024	0.0959169	1.35593
PKNOX2	0.0571475	0.102727	1.35537
DYNC2H1	0.0102926	0.0163627	1.35528
H19	0.136541	0.297792	1.35524
ITGA6	0.0295212	0.0493297	1.35518
AC015878.1	0.0764462	0.144479	1.35476
CARMIL1	0.00498257	0.00785858	1.3545
COL27A1	0.0121172	0.0193161	1.3544
LINC01278	0.0405857	0.0698181	1.3542
CECR2	0.177829	0.419859	1.35407
MMP2	0.0233924	0.0384254	1.35375
IGF2BP2	0.00638611	0.0100883	1.35296
AC024022.1	0.000421062	0.000608038	1.35159
VWC2	0.000421062	0.000608038	1.35159
CCDC15	0.000421062	0.000608038	1.35159
CYP7B1	0.00355564	0.00555487	1.35148
GJC1	0.00385974	0.00604387	1.35145
SH3RF3	0.0453812	0.0789267	1.35129
LARGE1	0.143138	0.31555	1.35128
SLC6A9	0.000327493	0.000467751	1.3511
AC113418.1	0.000327493	0.000467751	1.3511
AC133540.1	0.000327493	0.000467751	1.3511
AC020611.2	0.000327493	0.000467751	1.3511
ADCY9	0.149711	0.334375	1.351
SP140	0.000935694	0.0014027	1.35033
MRC2	0.0165384	0.0265581	1.34995
AC010105.1	0.000514632	0.000748308	1.34986
LINC02006	0.00149711	0.00229026	1.34902
LINC00511	0.00149711	0.00229026	1.34902
AGMO	0.00573113	0.00902021	1.34877
JAZF1	0.0220824	0.0360053	1.34847
AL392086.3	0.00109944	0.00165969	1.34836
AC008269.1	0.0341528	0.0574562	1.34778
CMSS1	0.1095	0.2236	1.34749
SLA	0.000608201	0.000888561	1.34669
AC007389.1	0.00575452	0.00904333	1.34668
FOXP1	0.120775	0.252864	1.34627
AC099066.2	0.0281176	0.0465098	1.34616
NR3C2	0.172402	0.40066	1.34613
IGSF11	0.0311352	0.0518752	1.34578
INPP5D	0.0049124	0.00769553	1.34568
AKT3	0.0868792	0.167524	1.3456
CMTM8	0.00694753	0.010923	1.34544
WDR17	0.00142693	0.0021735	1.34523
PTCHD1	0.00142693	0.0021735	1.34523
XKR4	0.00159068	0.00243033	1.34487
RFX3-AS1	0.0725163	0.134678	1.34475
STK3	0.162858	0.371343	1.3445
MCC	0.0494514	0.0864475	1.34422
TRPS1	0.103254	0.20722	1.3442
DAB2IP	0.177057	0.414308	1.34388
TFCP2L1	0.00587148	0.00920572	1.34337
AC068413.1	0.00870196	0.0136793	1.34317
CAMK2D	0.195373	0.471981	1.343
ZNF423	0.1335	0.286683	1.343
RFTN2	0.00603523	0.0094611	1.34298
LINC00944	0.000701771	0.0010288	1.34256
RAB27B	0.000701771	0.0010288	1.34256
AC068051.1	0.00233924	0.00359704	1.34205
SNTB1	0.0762123	0.142596	1.34201
C3	0.0216379	0.0350656	1.34189
TNNC2	18.3201	1168.94	1.34182
STK32A-AS1	0.000233924	0.000327446	1.34168
MCM10	0.000233924	0.000327446	1.34168
CEACAM16	0.000233924	0.000327446	1.34168
NRIP3	0.000233924	0.000327446	1.34168
UBASH3A	0.000233924	0.000327446	1.34168
PARD3B	0.130459	0.278035	1.34154
LURAP1L	0.00266673	0.00411004	1.34152
AP000317.1	0.00662004	0.010366	1.34074
LINC00472	0.134202	0.288132	1.34073
CENPP	0.0803294	0.151683	1.34016
OSBPL6	0.158156	0.356127	1.33972
DNAH14	0.00226906	0.00348039	1.33962
PTH1R	0.00259655	0.00399344	1.33934
AL356124.1	0.0377319	0.0636787	1.33888
XKR6	0.0201876	0.0325063	1.33887
STARD9	0.0161173	0.0256362	1.33866
RPS6KA2	0.0804697	0.151801	1.33838
DLK1	0.00561417	0.00876421	1.33805
CA4	0.00451473	0.00702088	1.33787
CAMK1D	0.0119769	0.0188516	1.33768
AC079760.2	0.000959087	0.00142605	1.33752
SEMA5B	0.00079534	0.00116901	1.33733
CLCA4-AS1	0.00145033	0.00219683	1.33705
KHDRBS2	0.0130997	0.0206481	1.33655
LINC01876	0.00128658	0.00193996	1.33648
AL121757.2	0.00128658	0.00193996	1.33648
HIF3A	0.0101289	0.0158748	1.33645
MIR1-1HG	1.36335	8.69587	1.33618
ENOX2	0.0495684	0.0861319	1.33576
AMPD3	0.00891249	0.0139329	1.33529
RMRP	0.0132401	0.0208315	1.3337
AC002070.1	0.0376617	0.0632863	1.33336
CPEB2-DT	0.0033685	0.00518188	1.33282
SORBS1	0.31568	0.907525	1.33232
SCGB2B2	0.0299656	0.0492798	1.33226
SLC4A4	0.0346909	0.05777	1.33213
KCNH1	0.00353225	0.00543807	1.33208
AC005323.2	0.1888	0.44716	1.3319
TSPAN5	0.0314393	0.0518795	1.33183
TPST1	0.010316	0.0161049	1.33085
IQGAP2	0.00264334	0.00403999	1.33053
ZNF521	0.0321411	0.0530513	1.32972
ZC4H2	0.00418723	0.0064623	1.3296
C1orf143	7.01771e-05	0.00011696	1.32959
AC117465.1	7.01771e-05	0.00011696	1.32959
AC068700.2	7.01771e-05	0.00011696	1.32959
AL121748.1	7.01771e-05	0.00011696	1.32959
AC005772.2	7.01771e-05	0.00011696	1.32959
AC092652.1	7.01771e-05	0.00011696	1.32959
ICOS	7.01771e-05	0.00011696	1.32959
AC078880.3	7.01771e-05	0.00011696	1.32959
TMPRSS3	7.01771e-05	0.00011696	1.32959
AC004882.1	7.01771e-05	0.00011696	1.32959
AL078622.1	7.01771e-05	0.00011696	1.32959
LINC01456	7.01771e-05	0.00011696	1.32959
AC092958.4	7.01771e-05	0.00011696	1.32959
TRBV20-1	7.01771e-05	0.00011696	1.32959
TCF7L2	0.0538024	0.0940454	1.32948
HLA-E	0.0344569	0.0572248	1.32938
ASAP1	0.0563756	0.0991891	1.32931
IGFBP7-AS1	0.000538024	0.000771676	1.32903
AF274853.1	0.000538024	0.000771676	1.32903
ZNF804B	0.000631594	0.000911924	1.3287
INSYN2A	0.000631594	0.000911924	1.3287
NPB	0.000631594	0.000911924	1.3287
TMLHE	0.07661	0.141951	1.32765
SMURF1	0.0423168	0.0716864	1.32724
GPATCH8	0.275235	0.745288	1.32713
WNT6	0.000444455	0.000631411	1.32681
FAM180B	0.000444455	0.000631411	1.32681
ASB9	0.000444455	0.000631411	1.32681
DPH6	0.0970315	0.189284	1.32667
AC008982.2	0.000725163	0.00105215	1.32665
USP9Y	0.0799785	0.14933	1.32635
LINC02649	0.00325154	0.00497212	1.32609
LINC01266	0.00357903	0.00548452	1.32539
C22orf34	0.00715806	0.0110838	1.32466
IL18RAP	0.000140354	0.000421053	1.32459
LIMS2	0.0192519	0.0305782	1.32439
SH3RF2	0.0829493	0.155794	1.32405
XYLT1	0.00959087	0.0148795	1.32389
AC137579.2	0.000818733	0.00119237	1.32273
HS3ST2	0.000818733	0.00119237	1.32273
RBFOX2	0.344008	1.01841	1.32257
LRP1	0.0387377	0.0647481	1.3224
KLHL13	0.0152518	0.0239089	1.32223
CACNA1E	0.0012398	0.0018465	1.32213
TACC2	0.583218	2.22189	1.32208
STX18-AS1	0.0231584	0.0371263	1.32202
AC036108.1	0.0228543	0.0366022	1.32177
PEBP4	0.510258	1.81484	1.32164
AC113167.1	0.0070411	0.0108749	1.3215
TNNC1	7.21165	174.237	1.32135
NGF	0.00107605	0.00158956	1.32101
ARHGAP26	0.0560949	0.0980042	1.32098
AC022784.1	0.0183864	0.0290434	1.32062
PLA2G2A	0.000350885	0.000491128	1.31991
LINC02770	0.000350885	0.000491128	1.31991
AC092620.1	0.000350885	0.000491128	1.31991
AL359636.2	0.000350885	0.000491128	1.31991
LRRC63	0.000350885	0.000491128	1.31991
AC090907.2	0.000350885	0.000491128	1.31991
AC004231.3	0.000350885	0.000491128	1.31991
FGF12	0.00516971	0.00795025	1.31984
MMP16	0.00210531	0.003177	1.31975
LINC00278	0.00781305	0.0120565	1.31951
GUCY1B1	0.00608201	0.00936696	1.31934
ITPKB	0.01455	0.0227133	1.31895
DOCK6	0.0124213	0.0192852	1.31837
ABHD3	0.0588318	0.103327	1.31826
FMO3	0.0024562	0.00371344	1.31804
ARID1B	0.319095	0.911533	1.3179
MDGA2	0.000912302	0.00133256	1.31765
AC018467.1	0.0271117	0.0437816	1.31759
FAM184A	0.00470186	0.0072063	1.31758
GAB2	0.0116728	0.0180868	1.31758
AC063944.1	0.00116962	0.00172971	1.31655
TBL1X	0.0292405	0.0474279	1.31635
CDK6	0.012164	0.0188471	1.31632
SLC2A1	0.00142693	0.00212672	1.31628
TJP1	0.0541065	0.0937085	1.31625
EXOC4	0.269971	0.719455	1.3161
GRM7	0.00414045	0.00632233	1.31578
GTDC1	0.0656624	0.117215	1.31562
CPQ	0.029872	0.0484901	1.31532
AC092969.1	0.00264334	0.0039932	1.31512
PLEKHA6	0.00984818	0.0151786	1.31477
TAFA5	0.00177782	0.00266363	1.31448
MAGI3	0.0232052	0.0369837	1.31412
ZFHX3	0.188051	0.438787	1.3139
AC013652.1	0.00273691	0.00413305	1.31384
PROCR	0.00432759	0.00660146	1.31337
CKM	17.7763	1073.89	1.31329
CHN1	0.0049124	0.00750838	1.31295
HMGCLL1	0.00650308	0.00996987	1.31288
SLC44A5	0.00308779	0.00466905	1.31276
TBX2	0.00400009	0.00608955	1.31273
NALCN	0.00283048	0.00427289	1.31264
AC087854.1	0.0293106	0.0474004	1.31221
LANCL3	0.000654986	0.000935287	1.31192
ITGA10	0.000748556	0.00107551	1.31167
PROSER2-AS1	0.000748556	0.00107551	1.31167
PKD2L2	0.0128892	0.0199284	1.31164
VWA8	0.250883	0.647382	1.31105
KALRN	0.124588	0.256163	1.31092
B4GALNT3	0.00961426	0.0147621	1.3102
FOXN3	0.276544	0.740542	1.30996
LCK	0.000561417	0.000795044	1.30987
KYNU	0.000561417	0.000795044	1.30987
AL139042.1	0.000561417	0.000795044	1.30987
TGFB2	0.0224333	0.0355452	1.30917
PCNT	0.480105	1.64121	1.30916
ITGB8	0.000842125	0.00121572	1.30884
FAM214A	0.143699	0.306968	1.3079
UFL1-AS1	0.00793001	0.0121248	1.30734
RGL1	0.00975461	0.0149465	1.30724
TMEM132B	0.00404688	0.00613596	1.30711
SLC2A13	0.00877214	0.0134208	1.30709
CFAP61	0.0371237	0.0610575	1.30695
VWC2L	0.0105733	0.0162165	1.30692
ERBB3	0.0015439	0.00229012	1.30685
CD200	0.00119301	0.00175304	1.30683
AC092535.4	0.00119301	0.00175304	1.30683
AL035446.2	0.00119301	0.00175304	1.30683
NEDD9	0.00902945	0.0138139	1.3065
SLC38A4	0.0289363	0.0465333	1.30607
TNFRSF21	0.00313458	0.00471554	1.30566
GAB1	0.144284	0.307992	1.30539
ABCA5	0.209923	0.50529	1.30539
HPGDS	0.000935694	0.00135591	1.30529
STARD13	0.0674636	0.120039	1.30522
TFPI	0.0228543	0.0361344	1.30488
CYP1B1-AS1	0.0049124	0.0074616	1.30477
DNAH3	0.00449133	0.00681056	1.30468
IGSF21	0.00533346	0.00811229	1.30467
TTTY10	0.0229947	0.0363618	1.30459
ZNF438	0.0887038	0.166596	1.30446
AC027288.3	0.000467847	0.000654783	1.3044
AL022328.1	0.000467847	0.000654783	1.3044
AC010601.1	0.000467847	0.000654783	1.3044
AL512603.2	0.00407027	0.00615916	1.30435
AC078923.1	0.00128658	0.00189317	1.30425
BX284613.2	0.00261994	0.00392314	1.3038
MAST4	0.0366558	0.0600627	1.30373
LINC02615	0.00739199	0.0112675	1.30371
AL133346.1	0.00332172	0.00499505	1.30335
SLC20A2	0.229432	0.569143	1.30314
AL355612.1	0.00102926	0.00149609	1.30294
PARD3	0.258345	0.669946	1.30284
CELSR3	0.000257316	0.000350827	1.30251
AC114930.1	0.000257316	0.000350827	1.30251
LTB	0.000257316	0.000350827	1.30251
AC134980.2	0.000257316	0.000350827	1.30251
GAREM1	0.041498	0.0688309	1.30245
PDE3A	0.0481181	0.0812207	1.30229
LINC01968	0.0101055	0.0154308	1.30212
ZCCHC7	0.0857798	0.159597	1.30206
ABCC4	0.0453344	0.0759367	1.3016
AP000446.1	0.00879553	0.013397	1.30125
AC104170.1	0.0154857	0.0239017	1.30111
KIF26B	0.00350885	0.00527448	1.30087
EYA1	0.0249363	0.0395204	1.30076
STAB1	0.0042808	0.00646151	1.29984
TRABD2B	0.00385974	0.00580994	1.29914
TNNT3	8.75915	250.864	1.29894
GINS3	0.00166086	0.0024535	1.29865
LINC00504	0.00636272	0.00964418	1.29818
ZEB2	0.05944	0.102975	1.29815
AC119677.1	0.000140354	0.000187124	1.29793
CADM3-AS1	0.000140354	0.000187124	1.29793
AC009229.1	0.000140354	0.000187124	1.29793
AC110926.2	0.000140354	0.000187124	1.29793
AC137630.4	0.000140354	0.000187124	1.29793
AC007620.3	0.000140354	0.000187124	1.29793
TRAM1L1	0.000140354	0.000187124	1.29793
RAET1E	0.000140354	0.000187124	1.29793
AC099681.1	0.000140354	0.000187124	1.29793
WNT2	0.000140354	0.000187124	1.29793
NKAIN3-IT1	0.000140354	0.000187124	1.29793
AC012213.3	0.000140354	0.000187124	1.29793
CCL27	0.000140354	0.000187124	1.29793
AL137847.1	0.000140354	0.000187124	1.29793
AC008083.3	0.000140354	0.000187124	1.29793
AC073611.1	0.000140354	0.000187124	1.29793
ACOT4	0.000140354	0.000187124	1.29793
IGHM	0.000140354	0.000187124	1.29793
AC022898.1	0.000140354	0.000187124	1.29793
AC087612.1	0.000140354	0.000187124	1.29793
AC108134.4	0.000140354	0.000187124	1.29793
MT1A	0.000140354	0.000187124	1.29793
KCNAB3	0.000140354	0.000187124	1.29793
AC005224.2	0.000140354	0.000187124	1.29793
AC060766.6	0.000140354	0.000187124	1.29793
AL158175.1	0.000140354	0.000187124	1.29793
XKR7	0.000140354	0.000187124	1.29793
AC068616.2	0.000140354	0.000187124	1.29793
AC079822.1	0.000140354	0.000187124	1.29793
AC010261.2	0.000140354	0.000187124	1.29793
AL356234.2	0.000140354	0.000187124	1.29793
AL356419.1	0.000140354	0.000187124	1.29793
RRM1-AS1	0.000140354	0.000187124	1.29793
CACNG7	0.000140354	0.000187124	1.29793
ANO1	0.00610541	0.00924971	1.29781
LINC02008	0.0012164	0.00177638	1.29753
ACKR1	0.000771948	0.00109887	1.29743
GPR160	0.000771948	0.00109887	1.29743
KIAA1328	0.0403752	0.0664899	1.29712
ADD3	0.0203046	0.0316828	1.29699
ATP2A2	2.10466	17.6734	1.29667
ETS1	0.0178484	0.027636	1.29662
AC010343.3	0.000678378	0.000958649	1.29622
AC104035.1	0.000678378	0.000958649	1.29622
SHROOM4	0.00699432	0.0105949	1.29618
LINC01376	0.0267609	0.0424671	1.29599
MYPN	0.659898	2.63213	1.29594
LINC00200	0.00130997	0.0019165	1.29587
AC022034.1	0.000865517	0.00123907	1.29566
LINC01684	0.000865517	0.00123907	1.29566
COL14A1	0.0184566	0.0285964	1.29507
CDK14	0.0997216	0.191117	1.29476
NFIA	0.293106	0.793847	1.29427
RMST	0.00240941	0.00357331	1.29347
ARHGAP42	0.0284451	0.0452281	1.29293
AP000676.5	0.000374278	0.000514504	1.29272
SOCS2-AS1	0.000374278	0.000514504	1.29272
AC016987.1	0.000374278	0.000514504	1.29272
PRR22	0.000374278	0.000514504	1.29272
FAM209A	0.000374278	0.000514504	1.29272
FNDC1	0.00374278	0.00560029	1.29248
NHSL1	0.00435098	0.00653108	1.29225
LINC02236	0.000584809	0.00081841	1.29218
AC002072.1	0.000584809	0.00081841	1.29218
AL157911.1	0.0082809	0.0125168	1.29214
ZRANB2-AS2	0.00706449	0.010664	1.29154
LINC01748	0.00505275	0.00760056	1.29151
OTUD7A	0.0144097	0.0220156	1.29133
SPIN3	0.00865517	0.0130719	1.29056
SLC9A3R2	0.0281878	0.0447046	1.29046
SSH2	0.225596	0.550724	1.29032
CELF2	0.115769	0.229626	1.28996
FGF1	0.00402349	0.00601918	1.28985
BACH1	0.0845634	0.155359	1.28978
ADAM19	0.0243281	0.0381468	1.28903
AC026341.1	0.00385974	0.00576315	1.28868
AC010789.1	0.0012398	0.00179972	1.28864
BMPR1A	0.164378	0.360202	1.2884
AC093425.1	0.037264	0.0604388	1.28835
ANKRD2	0.134155	0.276682	1.28803
MYCT1	0.00334511	0.0049715	1.2879
STK39	0.0119769	0.0181498	1.28788
FCHSD2	0.0465976	0.0774581	1.28746
GTF2IRD1	0.143676	0.302085	1.28737
IRF1	0.00439776	0.00657746	1.28733
PPP1R9A	0.123161	0.247884	1.28732
ARHGAP31	0.0110178	0.0166513	1.28674
SNCAIP	0.00170764	0.00250012	1.286
DDR2	0.0187607	0.0288892	1.28592
DOCK10	0.00977801	0.0147355	1.28567
GPM6B	0.00198835	0.00292016	1.28558
TRMT11	0.0840254	0.153649	1.28553
ZNF462	0.0934525	0.174877	1.28409
AC093912.1	0.00049124	0.000678153	1.28403
ITK	0.00049124	0.000678153	1.28403
DACT2	0.00049124	0.000678153	1.28403
PRRG4	0.00049124	0.000678153	1.28403
KRT19	0.00049124	0.000678153	1.28403
SEMA6A	0.0195326	0.0300994	1.28382
AFDN	0.0412407	0.0673784	1.28382
AL133367.1	0.00079534	0.00112223	1.28381
ABCD2	0.00088891	0.00126243	1.28318
AC004160.1	0.00311118	0.00459872	1.28307
SV2B	0.00479543	0.00715863	1.28288
SRGAP1	0.0082809	0.0124232	1.28248
PLAGL1	0.012281	0.0185401	1.28227
NEDD4	0.17287	0.383	1.28221
AL807742.1	0.00107605	0.00154277	1.28213
JARID2	0.105032	0.20189	1.28196
ACSS3	0.0560481	0.0950152	1.28192
GFOD1	0.0463637	0.0766845	1.2818
MYBPH	0.000701771	0.00098201	1.2815
CLCN1	0.122342	0.244647	1.28133
KCNMB2-AS1	0.00219888	0.00322339	1.28108
TTC39C	0.00229245	0.00336332	1.28107
PPFIA2	0.00383635	0.00569315	1.281
LYVE1	0.00247959	0.00364315	1.28063
AC021231.1	0.0154156	0.0234126	1.28051
DISP1	0.0248895	0.0388209	1.2803
LCP1	0.00126319	0.00182305	1.28013
CMTM7	0.00145033	0.00210326	1.2801
CPEB1	0.00135676	0.00196316	1.28004
LIN7A	0.0036726	0.00543706	1.27948
CASZ1	0.146881	0.308804	1.27895
MYLPF	12.0393	467.551	1.27895
SCFD2	0.0516971	0.0864543	1.27872
PTEN	0.0763761	0.136185	1.27839
MGAT5	0.0107137	0.0160731	1.27808
UTY	0.128073	0.258627	1.27773
MYO5A	0.0560247	0.0946201	1.2772
CNTN1	0.00360242	0.00532061	1.27718
NCOA7	0.0120003	0.0180323	1.27699
DIPK1A	0.0298253	0.0469957	1.27693
PLSCR1	0.00477204	0.00708867	1.27668
BMP6	0.00432759	0.00641432	1.27614
ATG16L1	0.0688437	0.120155	1.27573
THBS4	0.0187607	0.0286552	1.27551
SLC49A4	0.0913238	0.168838	1.2755
LINC01515	0.00460829	0.00683288	1.27514
ZSWIM6	0.042387	0.0689902	1.27496
AC090825.1	0.00353225	0.00520414	1.27478
ARHGAP10	0.199163	0.459632	1.27461
ZHX2	0.151138	0.319372	1.27458
ADAMTS5	0.00797679	0.0118901	1.27449
TEX41	0.00175443	0.00254675	1.27402
AC078881.1	0.00835107	0.0124455	1.2739
QKI	0.541065	1.91053	1.2738
CD44	0.00680718	0.0101296	1.27378
NLRP1	0.00844464	0.0125842	1.27371
CILP	0.00942712	0.0140638	1.27332
HRH1	0.00290065	0.0042491	1.27321
JMJD1C	0.226672	0.546822	1.27289
ENC1	0.00261994	0.00382957	1.2727
SNHG14	0.459309	1.49374	1.2726
PDE3B	0.00138015	0.00198649	1.27256
AC040168.1	0.00138015	0.00198649	1.27256
E2F5	0.00243281	0.0035498	1.27233
TARID	0.00346207	0.00508767	1.27225
LHCGR	0.00100587	0.00142596	1.27224
PATJ	0.191841	0.436318	1.27219
DAAM2	0.0640249	0.110035	1.27208
AC090630.1	0.00128658	0.00184638	1.27201
AL136962.1	0.00119301	0.00170626	1.27195
AC009522.1	0.0042808	0.00632115	1.2716
NT5C2	0.173922	0.382846	1.27147
ZNF366	0.00739199	0.0109868	1.27123
ZNF407	0.0973122	0.182024	1.27123
PLCH1	0.0051931	0.00769269	1.27122
PARP8	0.00446794	0.00660023	1.27113
PLCXD3	0.000818733	0.00114558	1.27082
CCDC171	0.0253105	0.0392209	1.27053
FRMPD4	0.00484222	0.00715817	1.27018
MBD5	0.139442	0.286745	1.27011
MNAT1	0.28782	0.759162	1.2698
NID2	0.00659665	0.0097815	1.26966
SLC1A1	0.00411706	0.00606521	1.26957
SLC1A7	0.00283048	0.00413253	1.26952
LINC01619	0.00283048	0.00413253	1.26952
PTPN7	0.000280708	0.000374208	1.26947
AC068620.1	0.000280708	0.000374208	1.26947
LMO3	0.000280708	0.000374208	1.26947
LINC00551	0.000280708	0.000374208	1.26947
AC009108.3	0.000280708	0.000374208	1.26947
TIAM1	0.00273691	0.0039927	1.26923
ADAM32	0.00264334	0.00385284	1.2689
CDH10	0.00039767	0.000537879	1.26885
AC008696.2	0.00039767	0.000537879	1.26885
AC005062.1	0.00039767	0.000537879	1.26885
AC021723.2	0.00039767	0.000537879	1.26885
CCL5	0.00039767	0.000537879	1.26885
PLAC1	0.00039767	0.000537879	1.26885
GNAQ	0.0567733	0.0954246	1.26857
NTN1	0.00559077	0.00827322	1.26843
MAST2	0.246368	0.610724	1.26819
ENTPD1-AS1	0.0334277	0.0528032	1.26807
ALCAM	0.00236263	0.00343318	1.26793
SH3GL2	0.000725163	0.00100537	1.26766
ST6GALNAC1	0.000725163	0.00100537	1.26766
MAOB	0.0926104	0.170683	1.26739
MEF2C	0.912746	4.28353	1.26697
RANBP17	0.004889	0.00720451	1.26595
TRAPPC9	0.202461	0.466518	1.26548
PLA2G5	0.000514632	0.000701522	1.26546
GPR39	0.000514632	0.000701522	1.26546
TAFA4	0.000514632	0.000701522	1.26546
LINC02112	0.000514632	0.000701522	1.26546
DNAH5	0.000514632	0.000701522	1.26546
COCH	0.000514632	0.000701522	1.26546
RUNX2	0.00388313	0.00569279	1.26508
AL590807.1	0.00453812	0.00666978	1.2643
GRIN2A	0.00130997	0.00186972	1.26423
AC098588.3	0.00881892	0.0130456	1.26372
LDAH	0.00334511	0.00487793	1.26366
MYBPC2	2.39285	21.5595	1.26364
SSBP3	0.0804229	0.1432	1.26343
CARD11	0.0012164	0.0017296	1.26336
AC114689.3	0.0012164	0.0017296	1.26336
KCNN3	0.0508316	0.0837593	1.26269
FGF10-AS1	0.00102926	0.0014493	1.2622
PDE7A	0.166226	0.358024	1.26198
TNRC6B	0.254298	0.634662	1.2615
LTBP1	0.0463637	0.075468	1.26147
AL513166.1	0.00683057	0.0100591	1.26053
HNF4G	0.000631594	0.000865139	1.26053
MITF	0.166881	0.359443	1.26046
RBM20	0.0803995	0.142806	1.2604
ADCY4	0.00626915	0.00922429	1.26028
NHSL2	0.00626915	0.00922429	1.26028
SLC66A1L	0.00308779	0.0044819	1.26014
RNLS	0.036726	0.0581627	1.25983
NDNF	0.0015205	0.00217323	1.2598
NSMCE2	0.103114	0.193775	1.25912
DIO3OS	0.00638611	0.00938656	1.25884
MYOM3	0.170413	0.368895	1.25849
LINC01121	0.000842125	0.00116894	1.25847
AL033504.1	0.000842125	0.00116894	1.25847
AC005208.1	0.000842125	0.00116894	1.25847
EFCAB2	0.0861307	0.155022	1.25844
FGGY	0.160729	0.341551	1.25809
SPRED1	0.0141056	0.0209716	1.25755
AL355835.1	0.0018246	0.00261668	1.2574
UBASH3B	0.00414045	0.00604162	1.25736
P4HA1	0.0709724	0.122735	1.25713
ANXA3	0.00821072	0.0120735	1.25709
2024-03-03	0.0226672	0.0345054	1.25697
LRRC8C	0.00793001	0.011657	1.2569
SFMBT2	0.0528901	0.0871951	1.2568
HELB	0.00133336	0.00189305	1.25675
GPR173	0.00133336	0.00189305	1.25675
NR2F2	0.0189244	0.0284853	1.25635
PAK3	0.0039767	0.00578563	1.25472
AP000943.2	0.00350885	0.00508734	1.25472
ELP4	0.0614283	0.103413	1.25469
NUBPL	0.0394629	0.062703	1.25463
HOXD8	0.000748556	0.00102873	1.25461
AC110285.1	0.000748556	0.00102873	1.25461
GRIP1	0.00891249	0.0130908	1.25458
SCLT1	0.0173337	0.025923	1.25431
ASAP2	0.0156963	0.0233571	1.25374
ANK2	0.206788	0.475531	1.2537
AL353138.1	0.0015439	0.00219655	1.25345
MEST	0.0015439	0.00219655	1.25345
GBX1	0.0732181	0.126902	1.25271
LGALSL-DT	0.0108774	0.0159994	1.25268
ADCY5	0.00638611	0.00933977	1.25257
AL162725.2	0.00254977	0.00366618	1.25257
CLIC6	0.00254977	0.00366618	1.25257
NCOA1	0.179466	0.393121	1.25255
IL32	0.0439776	0.0706307	1.25254
AC005699.1	0.00105266	0.00147265	1.25254
TESC	0.00353225	0.00511057	1.25186
DIO2-AS1	0.00467847	0.00680884	1.25125
RAMP2-AS1	0.00205853	0.00294327	1.25089
INVS	0.0740134	0.128283	1.25018
TMEM117	0.0778966	0.136348	1.25006
ANTXR1	0.0191583	0.0287103	1.24992
AC104211.2	0.000959087	0.00133248	1.24976
AC091114.1	0.000959087	0.00133248	1.24976
AC092440.1	0.0305036	0.0471185	1.24968
TAFA2	0.004889	0.00711093	1.24951
MIR29B2CHG	0.123161	0.240539	1.24917
AC087280.2	0.000538024	0.000724891	1.24845
FOLR2	0.000538024	0.000724891	1.24845
AC124254.2	0.000538024	0.000724891	1.24845
ANGPTL4	0.000538024	0.000724891	1.24845
CSF2RA	0.000538024	0.000724891	1.24845
AC027097.2	0.00432759	0.00627396	1.24821
EBF3	0.0437905	0.0700389	1.248
PKP4	0.0226204	0.03418	1.24785
EFHD1	0.0101757	0.0148913	1.2478
NEDD4L	0.0778498	0.135981	1.2476
AC096531.2	0.000421062	0.000561252	1.2476
TTC29	0.000421062	0.000561252	1.2476
RASSF7	0.000421062	0.000561252	1.2476
AC024588.1	0.000421062	0.000561252	1.2476
AC114311.1	0.000421062	0.000561252	1.2476
AL138824.1	0.000421062	0.000561252	1.2476
SYT12	0.000421062	0.000561252	1.2476
NRAD1	0.000421062	0.000561252	1.2476
LILRB2	0.000421062	0.000561252	1.2476
LIFR	0.0702239	0.120267	1.24738
TENT5A	0.021404	0.0322217	1.24735
PDE8A	0.0713935	0.122581	1.2468
MTSS1	0.0911366	0.164614	1.24675
RERGL	0.000865517	0.00119229	1.24674
MMP17	0.000865517	0.00119229	1.24674
AP000829.1	0.000865517	0.00119229	1.24674
FUT8	0.0172168	0.0255761	1.24637
AC096759.1	0.000654986	0.000888501	1.24629
AC012313.6	0.000654986	0.000888501	1.24629
LINC02018	0.0125617	0.0184396	1.24613
TMEM266	0.0359307	0.0561619	1.24612
MYO1E	0.0370535	0.0580918	1.24606
FSIP2-AS1	0.00348546	0.00501733	1.246
PIR	0.0457788	0.0734867	1.24593
AP000866.5	9.35694e-05	0.00023392	1.24592
SLCO5A1	0.126132	0.247307	1.24588
TMCC1	0.149407	0.30754	1.24586
FCN3	0.000163747	0.000210509	1.24585
AL033527.4	0.000163747	0.000210509	1.24585
AL589765.1	0.000163747	0.000210509	1.24585
AL023495.1	0.000163747	0.000210509	1.24585
CNTN2	0.000163747	0.000210509	1.24585
AC108463.3	0.000163747	0.000210509	1.24585
AL078621.4	0.000163747	0.000210509	1.24585
AC117460.1	0.000163747	0.000210509	1.24585
AC073352.2	0.000163747	0.000210509	1.24585
PF4	0.000163747	0.000210509	1.24585
PRDM9	0.000163747	0.000210509	1.24585
AC010255.3	0.000163747	0.000210509	1.24585
AL136307.1	0.000163747	0.000210509	1.24585
AL513008.1	0.000163747	0.000210509	1.24585
MCHR2-AS1	0.000163747	0.000210509	1.24585
AC005550.2	0.000163747	0.000210509	1.24585
FAM180A	0.000163747	0.000210509	1.24585
ZNF572	0.000163747	0.000210509	1.24585
AL133284.1	0.000163747	0.000210509	1.24585
AL157392.2	0.000163747	0.000210509	1.24585
KLLN	0.000163747	0.000210509	1.24585
GYS2	0.000163747	0.000210509	1.24585
LINC02326	0.000163747	0.000210509	1.24585
CERNA1	0.000163747	0.000210509	1.24585
AC090515.4	0.000163747	0.000210509	1.24585
AC009560.1	0.000163747	0.000210509	1.24585
AC009292.2	0.000163747	0.000210509	1.24585
AC092118.1	0.000163747	0.000210509	1.24585
IGSF5	0.000163747	0.000210509	1.24585
GPR34	0.000163747	0.000210509	1.24585
SMIM10L2B-AS1	0.000163747	0.000210509	1.24585
AL353689.3	0.000163747	0.000210509	1.24585
AC004936.1	0.000163747	0.000210509	1.24585
AC127024.2	0.000163747	0.000210509	1.24585
AC004687.1	0.000163747	0.000210509	1.24585
NDC80	0.000163747	0.000210509	1.24585
MAGEC3	0.000163747	0.000210509	1.24585
CD226	0.00493579	0.00715726	1.24552
GALNT8	0.00116962	0.00163614	1.24533
ARHGAP29	0.056282	0.0926964	1.24467
MIR4435-2HG	0.0117196	0.01715	1.24424
SIK3	0.124167	0.242045	1.24403
GLCCI1	0.0195326	0.0291637	1.24391
TBC1D1	0.141641	0.286548	1.24387
ZSWIM5	0.0164448	0.0243155	1.24331
ESR1	0.0638611	0.107225	1.24331
MIPOL1	0.0607734	0.1012	1.24327
SCN8A	0.00107605	0.00149599	1.24325
BEST3	0.0778966	0.135599	1.2432
AJAP1	0.00350885	0.00504056	1.24318
PTPRK	0.0863412	0.153558	1.24284
ANKUB1	0.0136144	0.0199793	1.24282
PPFIBP1	0.0589487	0.0976291	1.24269
MED13L	0.261293	0.649138	1.24267
ACACA	0.0563054	0.0925768	1.24247
LINC00466	0.000771948	0.00105208	1.24219
MYH9	0.0439075	0.0699117	1.24201
ANKRD44	0.0160939	0.0237421	1.24164
MLLT3	0.0460128	0.0736524	1.24163
AMPD1	0.486748	1.58861	1.2415
FRK	0.0125149	0.0183004	1.24147
ADAMTS6	0.00231584	0.00329304	1.24134
PON3	0.00159068	0.00224319	1.24131
EVA1C	0.0160238	0.0236274	1.24128
CLASP1	0.272661	0.687982	1.24125
CCNT2-AS1	0.0076493	0.0110999	1.24092
LINC01238.1	0.000304101	0.000397587	1.24092
AC008438.2	0.000304101	0.000397587	1.24092
AC018647.1	0.000304101	0.000397587	1.24092
AC018953.2	0.000304101	0.000397587	1.24092
SQLE	0.000304101	0.000397587	1.24092
AL441992.1	0.000304101	0.000397587	1.24092
LINC00545	0.000304101	0.000397587	1.24092
CLDN9	0.000304101	0.000397587	1.24092
PEAK1	0.0742006	0.127647	1.24025
PTPRJ	0.00736859	0.010683	1.24003
CASC2	0.000982479	0.00135582	1.23989
LRRC8D	0.0220824	0.0331046	1.23983
KCNQ3	0.00128658	0.0017996	1.23978
FMN1	0.00500597	0.00722674	1.23967
AC009315.1	0.00273691	0.00389912	1.23948
CDK8	0.0772416	0.133783	1.23902
TBC1D5	0.13336	0.264123	1.23898
ELN	0.00432759	0.00622718	1.2389
TEX9	0.00243281	0.00345623	1.23879
PLEKHG1	0.00739199	0.0107061	1.23875
ETV6	0.0277433	0.0421797	1.23847
PAM	0.182531	0.397369	1.23797
ATXN7L1	0.0325622	0.0500766	1.23753
ESRRB	0.037381	0.0582545	1.23751
MB21D2	0.0107137	0.0155585	1.23716
SLC38A6	0.0283048	0.0430371	1.23683
TRHDE-AS1	0.00140354	0.00196303	1.23588
SLC41A2	0.00140354	0.00196303	1.23588
AP001605.1	0.00140354	0.00196303	1.23588
OSBPL10	0.00835107	0.0120712	1.23559
NECTIN3-AS1	0.00203514	0.00287319	1.23536
DOCK3	0.0265269	0.0400935	1.23512
ABCC5	0.116283	0.221085	1.23503
PHACTR2	0.0482584	0.0772771	1.23502
LINC00534	0.0018246	0.00256989	1.23491
MTERF1	0.0139418	0.0203446	1.23478
COL25A1	0.00266673	0.00378254	1.23462
ADGRD1	0.0108774	0.0157655	1.23436
VTI1A	0.0793235	0.137597	1.2343
RTN4RL1	0.0159302	0.0233497	1.2342
MRTFA	0.0851248	0.149837	1.23394
CHST11	0.00669021	0.0096399	1.23363
RALGPS2	0.00659665	0.00950079	1.23323
AL357873.1	0.000678378	0.000911863	1.23296
CD81-AS1	0.000678378	0.000911863	1.23296
SLC16A8	0.000678378	0.000911863	1.23296
KLF7	0.0138249	0.0201373	1.23291
KANK1	0.0491941	0.0788234	1.23287
LINC01250	0.000561417	0.000748258	1.23279
LINC00299	0.000561417	0.000748258	1.23279
LINC00964	0.000561417	0.000748258	1.23279
ARNTL2	0.000561417	0.000748258	1.23279
RASAL3	0.000561417	0.000748258	1.23279
MYH7	13.0197	528.693	1.23276
CDKAL1	0.133266	0.26251	1.23253
CXXC4-AS1	0.00173103	0.00242987	1.23246
MYH2	14.2734	638.353	1.23233
PLCE1	0.0144565	0.0210786	1.23223
FGF7	0.0054972	0.00789998	1.23208
CAV1	0.0218251	0.0324843	1.23181
AC092153.1	0.0953239	0.171904	1.23168
TANC1	0.0120705	0.0174926	1.2314
MAP4K3	0.22438	0.521422	1.2307
RET	0.0061288	0.00880496	1.23067
CCDC80	0.0118131	0.017101	1.23065
ELF1	0.0748789	0.128037	1.23063
SLC39A11	0.0218017	0.0324151	1.23059
LINC01182	0.00100587	0.00137917	1.2305
PDE4C	0.012281	0.0177915	1.23049
AC097459.1	0.00079534	0.00107544	1.23029
PKIB	0.00472526	0.00676161	1.23005
ATG7	0.0594634	0.097615	1.23002
AC005165.1	0.00163747	0.00228982	1.22985
PRIM2	0.0131231	0.0190334	1.22977
ITFG1	0.138927	0.276315	1.22976
TLL1	0.00142693	0.00198636	1.22941
SLC24A2	0.0012164	0.00168281	1.22918
LINC02232	0.00322815	0.00457459	1.22912
AC138627.1	0.00636272	0.00912953	1.2289
MYO5C	0.00584809	0.00838725	1.22886
OSBP2	0.0211233	0.031298	1.22866
S100A2	0.000444455	0.000584625	1.2285
SELP	0.000444455	0.000584625	1.2285
LINC02789	0.000444455	0.000584625	1.2285
ARHGEF39	0.000444455	0.000584625	1.2285
AL162727.2	0.000444455	0.000584625	1.2285
SOX8	0.000444455	0.000584625	1.2285
EVPL	0.000444455	0.000584625	1.2285
CYYR1-AS1	0.000444455	0.000584625	1.2285
RAC2	0.000444455	0.000584625	1.2285
PIM2	0.000444455	0.000584625	1.2285
FRMD6	0.0259421	0.0389312	1.22832
JAM2	0.00626915	0.00899036	1.22832
NRAP	1.86444	13.5756	1.22818
AC108519.1	0.0132635	0.0192168	1.22808
DHRSX	0.0628085	0.103873	1.22805
ZNF609	0.0746216	0.127163	1.22726
AKAP6	0.256146	0.623543	1.22704
TGFBR3	0.0300592	0.0455313	1.2268
FTO	0.0913706	0.162466	1.2266
MARK1	0.0115558	0.0166626	1.22638
NEXMIF	0.00112283	0.00154267	1.22578
TWIST2	0.00240941	0.00338617	1.22573
AL662884.3	0.00133336	0.00184626	1.22569
APCDD1L-DT	0.00133336	0.00184626	1.22569
RNF144A	0.0279071	0.0420068	1.22565
MYLK3	0.0507614	0.0811698	1.22556
MROH7	0.0360476	0.0554283	1.22546
NR5A2	0.00219888	0.00308303	1.2253
FSIP1	0.00187139	0.0026165	1.22522
EIF1B-AS1	0.0233924	0.0347761	1.22518
ARHGAP30	0.000912302	0.00123899	1.22512
DCDC2C	0.000912302	0.00123899	1.22512
AL390838.1	0.000912302	0.00123899	1.22512
MYRFL	0.000912302	0.00123899	1.22512
SH3PXD2B	0.006737	0.00963928	1.22489
CBLB	0.0357201	0.0548436	1.22474
CCDC39	0.0103628	0.0148875	1.22461
MID1	0.0033685	0.00476081	1.22452
CEP85L	0.144705	0.289998	1.2245
AC009226.1	0.00166086	0.00231314	1.22436
ITIH6	0.0107605	0.0154639	1.22418
CRPPA	0.0193689	0.0284449	1.22412
AZIN1-AS1	0.0250064	0.0372946	1.22382
AC093865.1	0.0149945	0.0217411	1.22375
COL4A5	0.0302931	0.0457979	1.22375
MAPK4	0.0049124	0.00699374	1.22296
CTBP2	0.0917682	0.162838	1.22284
FARS2	0.0681887	0.113882	1.22281
TNRC6A	0.214789	0.488206	1.22275
DENND5B	0.0923998	0.164149	1.22229
TNFRSF19	0.00297083	0.0041785	1.22196
AC012063.1	0.00823411	0.011769	1.22189
GALNT14	0.00102926	0.00140252	1.22145
LINC01550	0.00102926	0.00140252	1.22145
UMAD1	0.0604225	0.0987398	1.22125
MCAM	0.00895927	0.0128092	1.2211
ELK3	0.01055	0.0151175	1.2211
GPC5	0.00493579	0.0070169	1.22109
OPRD1	0.00156729	0.00217308	1.221
SUCLG2-AS1	0.0431121	0.0673141	1.22061
IFI44L	0.00587148	0.00836358	1.22048
AC092844.1	0.000701771	0.000935224	1.22045
[truncated: 22,910 more rows]

## Sheet: Sup.Table2
gene	avg_log2FC	p_val_adj	cluster
HIST2H2AC	0.972604	1	0
HIST1H4C	0.90395	2.06166e-16	0
AL022162.1	0.902254	1.09321e-05	0
MIR4458HG	0.900987	4.78414e-07	0
AL451165.2	0.869603	1.87245e-07	0
AC104564.1	0.853513	1.97934e-07	0
HBB	0.847357	1.46068e-58	0
STRIT1	0.843969	0.010739	0
AC073349.1	0.841862	6.18903e-07	0
MT1E	0.829611	4.59488e-15	0
RPL38	0.824491	0	0
RPL37A	0.818874	0	0
RPS27	0.810329	0	0
AP004609.3	0.808959	3.08724e-05	0
CYP51A1	0.791256	5.0982e-08	0
RPL27A	0.790369	5.06673e-31	0
RFK	0.789851	1.08441e-07	0
LINC02716	0.785635	1.6542e-09	0
FABP7	0.774873	3.16799e-09	0
RPS29	0.769602	2.88338e-270	0
LINC01405	0.760137	1.00069e-68	0
COX17	0.732359	1.30012e-33	0
RPL36A	0.726848	0.000415878	0
SNHG19	0.726234	0.00019958	0
RPS21	0.71671	1.79648e-259	0
MYH11	0.714764	1	0
LINC00844	0.71416	2.19357e-10	0
COPS9	0.714058	1.27956e-46	0
ARMCX1	0.707375	3.26202e-07	0
RPS20	0.703762	1	0
PET100	0.703748	4.41607e-46	0
TIMM8B	0.70054	5.05005e-57	0
COX6C	0.699235	0.0780541	0
AL451062.1	0.699079	0.000245994	0
POLR2I	0.698631	9.69028e-48	0
SLIRP	0.697154	1.89616e-34	0
RPS17	0.686731	2.4641e-34	0
IMPACT	0.683407	1.12564e-09	0
ATP5F1E	0.683228	8.32174e-40	0
ROMO1	0.679378	7.86955e-36	0
HOXC-AS1	0.674677	2.90133e-23	0
RPL37	0.674386	0	0
COX7B	0.671715	6.64689e-08	0
RPL36	0.665339	1.35687e-35	0
RPL39	0.659538	1.11593e-287	0
ATP5ME	0.657647	0.00208362	0
VMA21	0.654857	3.06584e-33	0
SNRPF	0.649239	1.22044e-24	0
COMMD6	0.648504	1.4123e-39	0
COX7A1	0.648241	0	0
SNHG6	0.646996	1.00918e-11	0
RPL27	0.646978	5.10604e-25	0
AP003307.1	0.645937	2.3309e-09	0
RAB9B	0.637607	3.6558e-07	0
MRPS36	0.635796	5.95895e-67	0
ATP5MPL	0.634284	2.79957e-33	0
C11orf71	0.631822	2.47539e-12	0
TXNDC17	0.631566	2.3946e-20	0
NDUFA4	0.631217	1.11257e-107	0
NDUFB3	0.629793	4.40642e-49	0
NDUFB1	0.62713	2.65968e-45	0
MT-ND3	0.626337	0	0
AC078846.1	0.624915	6.18369e-10	0
ATP5MD	0.624173	0.0393312	0
UQCRQ	0.62184	1.69252e-16	0
RPS28	0.621341	0	0
MCM4	0.619667	4.1833e-07	0
HIST2H2BE	0.617362	3.95597e-10	0
RPL26	0.613715	1.79444e-94	0
POLR2L	0.609935	6.35465e-32	0
RPL35A	0.609586	4.79784e-18	0
ZSCAN16-AS1	0.609527	1.56071e-52	0
TPRKB	0.60857	2.7357e-37	0
OST4	0.606485	2.45617e-58	0
HIST1H1E	0.605716	7.14579e-30	0
NDUFA3	0.605281	2.56577e-30	0
ANGPTL1	0.603759	1.18034e-10	0
RPS16	0.602364	1.63299e-37	0
SNRPG	0.600726	8.20427e-50	0
LDHB	0.599307	1.19029e-29	0
UBL5	0.598449	1.32424e-68	0
AC018521.5	0.598097	3.06151e-73	0
MT2A	0.597565	1.37859e-47	0
COX7C	0.59668	1.90823e-156	0
SNX20	0.594952	4.48461e-12	0
COX6A2	0.594888	0	0
RPL35	0.593602	1.18797e-108	0
UQCR11	0.591361	3.89869e-56	0
AKIRIN1	0.589027	2.30051e-19	0
AL162231.1	0.588722	1.30227e-21	0
UBA52	0.58612	2.41727e-07	0
UQCRB	0.582219	1.27504e-40	0
SNRPE	0.581569	3.9387e-35	0
AL161772.1	0.581247	6.21956e-05	0
NDUFA2	0.580853	1.0316e-76	0
SF3B5	0.5782	3.89963e-55	0
COX7A2	0.576246	3.58465e-71	0
RPLP2	0.575416	3.81647e-30	0
PSMD10	0.574713	3.05584e-09	0
NDUFB2	0.574171	0.0347888	0
SMIM4	0.569144	2.39967e-65	0
ELOB	0.564352	1.44084e-07	0
PRPS1	0.562215	2.578e-09	0
PLN	0.561775	8.94811e-61	0
PCNA	0.554201	1.04766e-06	0
CYCS	0.554193	3.4994e-86	0
RPS25	0.553299	4.61256e-270	0
ATP5MF	0.552841	3.74823e-80	0
TOMM7	0.552704	1.18933e-59	0
RPS24	0.552066	1.01707e-171	0
RPS26	0.552011	7.84918e-50	0
VBP1	0.551332	7.18e-43	0
MAGEF1	0.550274	2.0332e-18	0
FAM3C	0.549799	2.36109e-12	0
TMSB4X	0.549651	3.97233e-07	0
SMIM27	0.548403	3.06589e-06	0
HIGD1A	0.547797	3.85786e-30	0
ATP5IF1	0.546934	9.42522e-31	0
RPL36AL	0.546503	3.90485e-64	0
BOLA3	0.54599	1.32217e-65	0
RPL41	0.54583	0	0
SMIM26	0.545295	1.60283e-91	0
SNHG5	0.544615	4.91508e-101	0
PDHB	0.542084	1.85486e-51	0
AC012146.1	0.541222	3.04686e-09	0
FMC1	0.541175	7.25148e-66	0
NDUFS5	0.540916	8.1068e-23	0
MIF	0.540855	9.61629e-58	0
GHITM	0.540311	3.42435e-70	0
RPL13A	0.53909	1.12623e-92	0
SLC25A46	0.537995	4.29125e-46	0
NAA38	0.53595	1.2879e-77	0
NDUFB6	0.531622	1.9175e-87	0
TAF13	0.531331	5.37044e-24	0
RPL23A	0.530292	1.26539e-21	0
COX6B1	0.529084	1	0
AC073896.2	0.528852	7.61206e-38	0
SNHG8	0.526926	4.60535e-28	0
GGPS1	0.525485	2.45986e-12	0
TMEM258	0.524873	4.98608e-84	0
ATP5PB	0.523647	1.01074e-91	0
SMIM30	0.523389	3.67776e-58	0
KIF22	0.522941	3.21432e-70	0
MSTN	0.52176	1.97849e-12	0
TRMT6	0.516414	5.69939e-11	0
MZT1	0.515197	5.35758e-10	0
GNG5	0.515053	8.00345e-87	0
NDUFS6	0.51338	1.67545e-100	0
FABP4	0.513358	0.000146132	0
MRPL57	0.512356	1.1557e-86	0
RPL34	0.509597	7.25581e-39	0
MINCR	0.508518	5.88938e-10	0
NDUFB4	0.507477	1.8319e-51	0
MT1X	0.507308	1.94524e-20	0
KRT10	0.506255	2.67624e-49	0
ATP5PF	0.505438	3.42578e-22	0
MICOS10	0.505213	1.57934e-104	0
POLR2G	0.50466	1.81992e-15	0
HINT3	0.504571	3.33092e-67	0
DPM3	0.504534	3.41096e-49	0
MTMR6	0.503975	8.68096e-13	0
GTF3A	0.503766	2.10774e-86	0
RNFT1-DT	0.503329	1.39053e-26	0
MRPL33	0.502986	3.74452e-62	0
PRELID3B	0.502097	5.68011e-07	0
ATP5MG	0.500764	4.05304e-35	0
GTF2H5	0.499885	1.21142e-64	0
LEPROTL1	0.499523	1.10869e-09	0
POLR1E	0.498243	9.18424e-12	0
MDH1	0.49653	3.75648e-86	0
HADHB	0.496134	1.26156e-90	0
TMEM256	0.494617	1.93982e-41	0
PIGH	0.493245	1.70545e-07	0
NDUFAF8	0.493117	1.36388e-92	0
DYNLRB1	0.492831	5.93584e-39	0
KRTCAP2	0.49265	3.78951e-63	0
GATM	0.49245	5.97383e-77	0
ATP6AP2	0.490957	6.54624e-06	0
SHISA2	0.489878	7.1304e-19	0
RPA3	0.489752	6.15919e-18	0
LSM5	0.487958	3.75753e-50	0
PSENEN	0.486235	9.40251e-18	0
CA3	0.485046	1.56062e-134	0
COA6	0.484781	7.13249e-62	0
S100A13	0.483294	1.26027e-75	0
CHCHD5	0.482637	6.43148e-44	0
SNRPD2	0.482084	6.2712e-90	0
NDUFB11	0.480948	2.05493e-40	0
NDUFC1	0.480529	7.96964e-84	0
FAM92A	0.477823	1.00685e-11	0
C10orf71-AS1	0.477798	5.04056e-70	0
PITPNA-AS1	0.477071	4.38292e-28	0
RELA-DT	0.474784	8.8522e-19	0
HSPE1	0.474741	3.37896e-84	0
PRR34-AS1	0.474157	4.40569e-69	0
NDUFA12	0.47358	4.53574e-103	0
BNIP3	0.472785	5.89889e-66	0
GSTO1	0.472721	2.88816e-52	0
IFIT1	0.472265	3.87826e-16	0
ATP5PD	0.47198	2.73704e-52	0
IFI27	0.46931	7.66284e-06	0
CACYBP	0.46848	1.86217e-48	0
C12orf75	0.468409	1.36812e-31	0
MRPS33	0.468396	1.40124e-84	0
RPS15A	0.468102	4.83174e-230	0
DNTTIP2	0.467783	1.45207e-29	0
SRP14	0.46602	3.45316e-107	0
RCN2	0.465828	2.03771e-35	0
CCT2	0.464944	1.08623e-32	0
GNG10	0.464849	1.78528e-21	0
TMA7	0.464813	6.90216e-96	0
ATP5F1A	0.464557	9.917e-74	0
RPS12	0.46439	2.55265e-105	0
RPS18	0.463972	1.9349e-116	0
NDUFA7	0.463832	6.89695e-97	0
CHURC1	0.463356	7.10078e-88	0
RPL17	0.462946	3.04982e-50	0
COX14	0.462656	4.42729e-111	0
RPS23	0.461948	9.9445e-226	0
NDN	0.460978	9.72403e-13	0
IER3IP1	0.459751	8.45425e-71	0
PXMP4	0.458195	4.65828e-13	0
C14orf119	0.458195	1.02767e-11	0
TXN	0.457724	1.09298e-37	0
RPS19	0.457124	1	0
TCEAL1	0.456856	9.7316e-26	0
NSA2	0.455647	2.1947e-104	0
MORN2	0.455544	3.5161e-11	0
S100A6	0.454787	8.45862e-33	0
C4orf3	0.453567	5.19135e-81	0
MRPL16	0.453212	7.60736e-51	0
SRSF8	0.452539	4.96734e-14	0
C12orf57	0.452434	5.84007e-98	0
NDUFB7	0.452227	5.33365e-49	0
EIF3J	0.451568	3.99218e-104	0
HSPH1	0.451506	2.302e-29	0
PSMC1	0.449168	8.14549e-92	0
RPP21	0.446977	7.54479e-37	0
AKR1C3	0.445117	1.5031e-08	0
MRPL52	0.444526	2.48767e-76	0
NUDT15	0.443518	7.79573e-09	0
CCDC47	0.442348	5.31947e-70	0
AC016876.1	0.441779	1.03976e-17	0
LACTB2	0.441658	1.94436e-13	0
LINC00632	0.440401	0.00922782	0
RPS14	0.439183	1.03154e-12	0
RBIS	0.439135	2.30533e-68	0
NOL11	0.439036	3.87886e-28	0
POLE4	0.437731	6.33217e-41	0
NME2	0.436686	9.62137e-108	0
PTRHD1	0.434547	8.8693e-56	0
IARS2	0.433506	2.2559e-72	0
SET	0.433503	1.14538e-91	0
RSL24D1	0.433048	3.01586e-61	0
FAU	0.432908	0.000180766	0
UBB	0.432141	4.20658e-70	0
GNG11	0.432065	7.30268e-05	0
COA4	0.432018	2.26593e-59	0
RPS15	0.431864	5.68717e-65	0
PRDX3	0.431622	8.06737e-83	0
RPLP1	0.430485	0	0
DNAJB9	0.429349	1.50471e-11	0
NDUFA6	0.429125	2.75611e-97	0
TNNC1	0.428609	0	0
SPCS3	0.428235	1.4034e-22	0
TIPRL	0.427397	3.04299e-23	0
PFDN2	0.426873	5.58307e-77	0
DNAJB4	0.425998	5.9127e-49	0
CCT4	0.425935	1.13529e-66	0
CSTF2T	0.425788	1.25115e-25	0
CISD2	0.425598	6.35483e-12	0
LGALS1	0.425394	6.07623e-47	0
ADO	0.42527	5.7403e-09	0
KLHL18	0.424743	1.24652e-63	0
NDUFV3	0.423279	4.30587e-115	0
HNRNPAB	0.423066	4.51672e-66	0
SEC61G	0.421304	2.75657e-63	0
VDAC1	0.420504	2.43985e-77	0
DMAC1	0.420389	8.19807e-92	0
HCG11	0.419855	1.7964e-11	0
KCTD12	0.419176	3.9641e-06	0
MMGT1	0.418969	1.58096e-18	0
TXNDC9	0.418143	1.66961e-14	0
HMGB2	0.418087	7.61487e-11	0
KANSL1-AS1	0.417916	1.70475e-14	0
CFL2	0.41776	3.32174e-102	0
PAIP1	0.417167	2.98115e-80	0
THAP1	0.416933	3.63982e-12	0
CA2	0.416144	3.08189e-42	0
CRIP1	0.415918	3.09083e-07	0
BX284668.5	0.415387	1.42028e-10	0
EIF1AX	0.415063	1.9326e-76	0
NDUFC2	0.413418	3.1305e-119	0
TMEM70	0.413262	1.67865e-25	0
DPH3	0.413247	3.81777e-29	0
NDUFA13	0.412283	3.91784e-41	0
GABARAPL2	0.41059	8.45471e-91	0
TRAPPC4	0.409391	1.8009e-21	0
TPT1	0.408604	0	0
PRNP	0.40731	1.2354e-22	0
COX20	0.40713	3.55774e-53	0
TST	0.406972	6.06494e-27	0
RANBP6	0.405779	3.40588e-14	0
LAMTOR2	0.405442	6.26159e-72	0
AK3	0.405006	1.76612e-92	0
COX5B	0.404928	1.3636e-06	0
RPL21	0.404883	0.000210198	0
MRPS18C	0.404601	3.20597e-55	0
PSMA4	0.404346	3.97062e-70	0
MRPL46	0.40365	3.51347e-44	0
ATP6V1E1	0.403491	8.08383e-63	0
PPID	0.403467	3.24464e-37	0
LIN7C	0.403366	5.99341e-19	0
DNAJC19	0.403278	2.86663e-103	0
TOMM5	0.402598	2.40778e-103	0
IDI1	0.402199	5.56509e-74	0
RPL12	0.402112	1.03371e-19	0
SCOC	0.402051	5.50892e-23	0
RPL32	0.402003	1.66244e-125	0
AC010642.2	0.40171	7.81293e-19	0
ATP5MC1	0.401657	1.67302e-111	0
ICAM3	0.399934	2.26633e-20	0
PYURF	0.399931	3.71472e-73	0
COA8	0.399476	7.04111e-120	0
MRPL41	0.398653	7.79083e-88	0
PPP1CB	0.398054	2.16906e-137	0
MYL2	0.397984	0	0
ZNF622	0.397893	1.34003e-18	0
MYH7	0.39681	0	0
C1QBP	0.395851	8.3555e-83	0
NOL7	0.39497	2.4044e-61	0
ACAA2	0.393623	4.98937e-34	0
UQCRH	0.39324	4.92076e-95	0
RPL30	0.392872	1.00293e-110	0
HIST1H1C	0.392005	4.95876e-66	0
MRPS22	0.391484	4.35265e-48	0
MRPL58	0.389704	2.04068e-59	0
NDUFA8	0.389102	2.17826e-111	0
RPL7	0.389071	3.38124e-46	0
COQ2	0.388831	5.51167e-31	0
TMED2	0.388797	7.88232e-50	0
NOLC1	0.388474	2.89358e-29	0
MSL3	0.387716	5.87869e-28	0
GGCT	0.387697	1.0462e-25	0
POMC	0.38719	3.24877e-33	0
LINC01003	0.386417	6.80483e-09	0
DYNLL2	0.384872	3.36268e-82	0
SERBP1	0.383377	5.86035e-124	0
MT-ND4L	0.383299	1.15492e-283	0
COPS3	0.383202	8.99994e-70	0
PFDN5	0.382933	1.23318e-101	0
GTF3C6	0.382702	1.91216e-110	0
PDCD5	0.382615	2.99218e-106	0
ATOX1	0.38202	4.57659e-42	0
STBD1	0.381961	1.99491e-112	0
PPA1	0.381536	8.3062e-38	0
PRKAB2	0.381058	2.38768e-73	0
PHPT1	0.381051	2.32946e-107	0
ENTPD3-AS1	0.380965	6.85582e-35	0
LAMTOR5	0.380828	5.10887e-105	0
FH	0.380421	6.08951e-74	0
RRM1	0.380355	1.8854e-33	0
CSRP3	0.380042	5.24952e-95	0
NDUFB9	0.379115	4.48107e-24	0
ECHS1	0.379092	3.47027e-97	0
CPT2	0.378735	2.73211e-11	0
DLAT	0.378496	1.40276e-67	0
AC025183.1	0.37803	1.73428e-10	0
HSP90AA1	0.37773	1.15213e-112	0
FKBP3	0.377714	5.59581e-139	0
C5orf22	0.377185	8.77554e-20	0
ZFAS1	0.376874	2.41658e-31	0
HSPA8	0.37652	3.30588e-65	0
MT-ND1	0.376213	0	0
RNF141	0.376068	5.53548e-36	0
TMEM141	0.375589	4.1478e-32	0
SOD2	0.375257	9.42776e-127	0
TSPYL1	0.375121	1.43612e-91	0
ENPP4	0.375047	5.24426e-27	0
SEM1	0.374593	2.57444e-119	0
IPO5	0.37413	6.91029e-86	0
SERINC1	0.373624	1.22005e-89	0
PSMD7	0.373538	5.21878e-109	0
MT-ND4	0.372905	0	0
NOP10	0.371163	8.97577e-92	0
KIAA1143	0.370429	4.09985e-27	0
NDUFAF4	0.369687	7.92601e-39	0
FDX1	0.368873	1.96513e-42	0
C15orf61	0.368391	8.02551e-126	0
SNAPC5	0.368287	2.50935e-37	0
NORAD	0.367899	3.66502e-112	0
HSP90B1	0.367426	2.45969e-63	0
TPM3	0.366926	5.70369e-122	0
LSM3	0.366922	4.56934e-75	0
AC007114.1	0.366844	5.16801e-14	0
PSMB10	0.366481	6.49299e-81	0
RPS8	0.365441	3.91717e-39	0
MRLN	0.365203	6.03619e-98	0
DDX20	0.364262	1.72115e-09	0
SSR4	0.362539	1.80578e-69	0
BEX3	0.361579	7.55348e-14	0
PRXL2A	0.361254	3.7284e-53	0
HIST1H2BD	0.360245	1.32612e-09	0
POMP	0.36017	3.52563e-113	0
FHL1	0.359873	2.68328e-121	0
ADIRF	0.359851	4.09881e-22	0
RPL15	0.358913	1.40698e-66	0
CKB	0.358849	1.50712e-27	0
RPF1	0.358611	1.38851e-18	0
MRPL17	0.357254	1.14703e-32	0
GLRX5	0.356628	5.06047e-123	0
SELENOP	0.356473	1.45057e-84	0
B2M	0.356341	5.12138e-69	0
MPC1	0.356224	3.95014e-120	0
PCBP1	0.356145	3.06781e-148	0
FYTTD1	0.355845	4.92596e-97	0
GSTZ1	0.355788	1.42422e-44	0
HINT1	0.355625	1.71927e-124	0
P2RY1	0.355492	4.76167e-11	0
RRS1	0.35545	7.66474e-23	0
EID1	0.355363	1.06143e-112	0
OXLD1	0.355355	5.24498e-19	0
THAP11	0.35534	1.93634e-29	0
MT-ND2	0.355258	6.66178e-185	0
NDUFB10	0.355172	2.58384e-28	0
SF3B6	0.353877	1.85498e-48	0
HSPA9	0.353795	2.36333e-109	0
CDK2AP1	0.353605	1.67762e-31	0
MYL12B	0.353274	5.58954e-73	0
EMC3	0.352245	2.07863e-110	0
SNHG10	0.352048	1.07617e-09	0
TOB1	0.351207	5.12872e-109	0
LSM6	0.350881	4.26996e-31	0
SBDS	0.350807	4.91759e-122	0
ABCE1	0.350632	3.98029e-25	0
LRPPRC	0.348194	2.80088e-118	0
EIF2A	0.348119	2.11121e-64	0
AKR1C2	0.347886	9.0842e-27	0
CUTA	0.347485	3.10897e-64	0
GNL3	0.347464	4.95136e-36	0
EPRS	0.347357	3.21494e-81	0
TAGLN	0.346922	5.99516e-09	0
MYL12A	0.346737	3.96287e-05	0
CHMP2A	0.346658	6.23855e-96	0
FAM104B	0.346187	3.02725e-19	0
DGCR6	0.346069	1.14321e-77	0
MORF4L1	0.345947	1.41149e-154	0
CHCHD7	0.345095	1.77125e-17	0
GLO1	0.344909	1.59413e-84	0
HTATSF1	0.34415	5.82712e-94	0
MT-CO3	0.343658	0	0
MRPS21	0.343294	2.22597e-83	0
RPL22L1	0.343267	5.68756e-07	0
SMNDC1	0.342812	1.39733e-36	0
MED7	0.342484	2.56102e-13	0
TIMM13	0.340759	3.8259e-97	0
LMOD2	0.34039	4.36869e-74	0
SUB1	0.340208	4.3162e-90	0
AKR1B1	0.339823	1.5819e-118	0
COA5	0.339292	6.26267e-67	0
RNF181	0.338756	4.18771e-79	0
CISD1	0.337636	9.38413e-122	0
PPP1CC	0.336985	6.65516e-104	0
COX16	0.336789	6.2292e-94	0
LINC00909	0.33677	2.67845e-24	0
COPS7A	0.336721	2.50365e-46	0
SERF2	0.336392	7.21174e-115	0
IGIP	0.336317	8.30226e-08	0
MTRF1L	0.336198	3.33612e-41	0
AC068700.1	0.336052	1.01085e-25	0
C4orf54	0.335995	7.98931e-106	0
EIF1AY	0.335338	1.20432e-80	0
ANP32E	0.334601	2.27662e-45	0
NPM1	0.334581	5.67146e-118	0
HES6	0.333894	2.78461e-21	0
YEATS4	0.333601	5.84029e-19	0
COX4I1	0.33359	5.3729e-16	0
ACAT1	0.332724	5.1253e-159	0
PAF1	0.33271	3.85554e-34	0
KRR1	0.33244	8.83249e-48	0
UNG	0.332278	7.88452e-19	0
RPL9	0.332273	4.14944e-16	0
COPZ1	0.332005	1.28792e-44	0
KPNA4	0.331658	2.91794e-147	0
CAMLG	0.331621	4.9782e-46	0
MYH2	0.331286	0	0
ASNSD1	0.330958	2.43105e-25	0
AC133552.5	0.330761	8.27357e-34	0
UQCC3	0.329857	1.46779e-70	0
SLC25A4	0.329743	0.256609	0
KIF1BP	0.329535	1.0297e-32	0
THOC7	0.329021	1.1124e-64	0
LAP3	0.32888	4.70144e-25	0
UQCRC1	0.328244	6.84361e-148	0
BZW1	0.328165	4.24905e-22	0
TP53TG1	0.328131	1.29295e-31	0
DYNLT1	0.327822	1.0841e-62	0
SSB	0.327051	2.38773e-33	0
COMTD1	0.326459	6.16616e-36	0
MAP1LC3B	0.326032	7.43529e-104	0
CHRAC1	0.325384	7.6116e-29	0
ISCA1	0.32526	5.927e-102	0
SMPX	0.325003	4.35995e-138	0
RRM2B	0.324487	1.26222e-36	0
NDUFA11	0.324256	9.24337e-131	0
EIF4A2	0.323998	5.06797e-166	0
MRPS17	0.323996	5.09663e-35	0
PNPLA4	0.323956	1.32633e-55	0
TSN	0.323554	1.81073e-35	0
ANKRD1	0.322992	2.60802e-53	0
TMEM203	0.320958	5.56986e-35	0
S100A1	0.320764	5.14554e-50	0
GCLM	0.320481	1.48706e-20	0
LSM7	0.320429	7.20401e-70	0
H3F3A	0.319815	2.14458e-158	0
DNAJA1	0.319772	3.56101e-57	0
OXSM	0.31967	2.47087e-12	0
CHCHD1	0.318718	7.74534e-72	0
NARS	0.318133	1.72792e-61	0
SELENOM	0.318065	3.97861e-25	0
HAUS3	0.318034	8.68825e-14	0
ERVK3-1	0.317719	6.20592e-20	0
RBX1	0.317676	5.87824e-126	0
UQCRFS1	0.317214	4.14693e-125	0
COPS4	0.316895	1.33375e-57	0
LAMTOR3	0.316776	1.80033e-25	0
MRPL11	0.316305	1.36028e-80	0
SEPHS2	0.316295	8.126e-26	0
NAMPT	0.315195	1.82104e-55	0
COA3	0.315159	9.87553e-88	0
AGT	0.315133	3.7229e-17	0
SPX	0.314823	1.68482e-11	0
CDC26	0.314742	5.30407e-48	0
KRAS	0.313985	1.43154e-20	0
NSMCE3	0.312844	2.02111e-10	0
TAF9	0.312799	4.65581e-16	0
SUCLA2	0.312794	6.90079e-106	0
TMEM59	0.31255	3.25308e-91	0
RTCB	0.311925	2.83535e-38	0
NDUFA5	0.311577	7.17562e-108	0
HSPD1	0.311449	3.90737e-95	0
HSPA14.1	0.31135	1.69101e-18	0
HSD17B12	0.311311	2.40052e-29	0
H2AFZ	0.311269	2.10125e-60	0
PNPO	0.310968	4.16076e-30	0
HSBP1	0.310801	1.28099e-90	0
PAM16	0.310466	1.8771e-114	0
UQCC2	0.310356	2.14811e-134	0
HEBP2	0.309664	4.7699e-137	0
RIOK2	0.309547	7.37957e-17	0
ALDH1B1	0.309367	1.05311e-13	0
HSPA5	0.30905	2.20252e-47	0
LINC02478	0.30866	2.97431e-21	0
EIF1B	0.30766	5.87813e-78	0
SELENOS	0.30752	3.60221e-59	0
AL118516.1	0.30734	4.64685e-31	0
BAG1	0.306708	1.22323e-131	0
TIMM10	0.306306	5.56739e-54	0
METTL9	0.30539	4.384e-76	0
ACADSB	0.305269	6.74626e-45	0
MALSU1	0.305231	6.45839e-114	0
PIGX	0.304831	3.82378e-23	0
SLC25A3	0.304488	4.16424e-112	0
NUDT22	0.304486	1.68034e-35	0
ANAPC13	0.303813	2.89361e-45	0
MRPS15	0.303711	3.17599e-147	0
RPS10	0.303589	6.23278e-116	0
EIF2S2	0.303205	6.17853e-125	0
PDE12	0.303205	3.2655e-11	0
UGP2	0.303103	6.42912e-143	0
MRPL54	0.303005	1.24829e-62	0
ACTR6	0.302881	2.66024e-12	0
PHYH	0.302638	9.67091e-145	0
PSMA6	0.302527	2.33186e-123	0
TMEM170B	0.302497	1.5238e-20	0
H2AFJ	0.300936	1.30263e-46	0
COA6-AS1	0.300423	2.24342e-10	0
PSMB4	0.30028	1.57816e-92	0
CALM1	0.300013	3.90069e-124	0
MPC2	0.299898	4.0456e-117	0
PSMC6	0.299635	3.64546e-79	0
PNO1	0.299161	7.98017e-15	0
ATP5PO	0.297947	1.64087e-109	0
HADHA	0.297671	1.5292e-135	0
TCP1	0.297665	4.74621e-72	0
CHMP5	0.297364	2.39139e-28	0
RPS6	0.297031	2.6305e-21	0
SCAND1	0.296729	2.05283e-93	0
C19orf53	0.295586	3.40334e-118	0
ANAPC11	0.29558	4.46294e-138	0
MT-ND5	0.295189	1.69401e-150	0
TRMT1L	0.295036	4.18537e-39	0
MMADHC	0.294899	1.77034e-116	0
GNAS	0.294467	3.73209e-88	0
ETV3	0.294223	5.49886e-13	0
ATP6V1G1	0.29419	2.17373e-95	0
ATP5F1C	0.293054	2.00363e-149	0
MRPL21	0.292978	7.6886e-86	0
RDX	0.292885	7.7035e-126	0
HAX1	0.291942	5.26793e-112	0
ATP5F1B	0.291882	2.30023e-107	0
CIAO2B	0.291607	1.25654e-148	0
PDLIM1	0.291238	1.46086e-88	0
NUDT12	0.291203	2.44419e-16	0
HSPA2	0.290998	2.38039e-56	0
RPL22	0.290458	3.64284e-36	0
UBL4A	0.290255	1.0512e-62	0
TMEM126A	0.290127	2.06785e-59	0
CDV3	0.289886	2.18591e-144	0
MYL1	0.289879	7.01916e-244	0
DDX1	0.289802	1.83913e-107	0
APOC1	0.289685	0.00944193	0
MCMBP	0.289549	3.81405e-30	0
NDUFS1	0.288931	4.12833e-156	0
SNRPC	0.288714	4.35201e-84	0
GPN3	0.288651	8.12025e-41	0
MYOZ2	0.288498	8.56392e-107	0
MRPL51	0.288244	2.94711e-141	0
TMED7	0.288189	1.99087e-23	0
KIAA1586	0.287816	9.50654e-17	0
SNRPD1	0.2878	2.69764e-50	0
ZNF330	0.287277	3.0627e-41	0
SMS	0.287198	1.90755e-31	0
RTRAF	0.28719	1.06131e-93	0
ITGB1BP2	0.286851	4.40186e-24	0
COX5A	0.286608	7.28263e-49	0
TTC33	0.286278	3.69721e-38	0
SNU13	0.285942	3.76332e-128	0
HOXA7	0.28522	1.22759e-19	0
RPL13	0.284357	9.91252e-53	0
OSTC	0.284177	2.82354e-21	0
LYRM7	0.284035	2.96592e-64	0
GTF2A2	0.283841	1.09401e-76	0
SLITRK4	0.283184	3.00814e-11	0
SDHB	0.28293	8.95005e-132	0
PDHX	0.282686	1.36191e-105	0
RPL10A	0.28265	1.51028e-53	0
C1orf167	0.282565	1.30849e-15	0
ZNF593	0.282562	8.37585e-85	0
CKLF	0.282512	3.36206e-12	0
BTBD1	0.282459	1.3024e-132	0
ELOC	0.282347	1.93903e-108	0
FAM98A	0.281997	1.37096e-43	0
ESD	0.281838	1.72157e-69	0
MAGED1	0.28183	1.86694e-35	0
KLHL9	0.281482	6.25906e-22	0
ZBTB18	0.281029	1.09897e-64	0
PSMD6	0.280889	1.91651e-54	0
TMEM14C	0.280747	1.93838e-80	0
VDAC2	0.280419	9.0851e-172	0
GTPBP4	0.280207	1.38322e-45	0
RWDD1	0.280176	3.57596e-129	0
DCN	0.279563	2.76298e-11	0
DR1	0.279333	1.0002e-49	0
MRM3	0.278407	6.04647e-16	0
EMC6	0.277854	5.09695e-134	0
GSTM3	0.277682	1.36656e-28	0
PSMB6	0.27619	1.49371e-170	0
KARS	0.276115	1.35651e-78	0
MYOT	0.276091	6.69699e-07	0
OMA1	0.275764	6.37638e-19	0
NIFK	0.275044	1.46335e-20	0
RPF2	0.274965	1.15367e-33	0
PKIA	0.274368	1.10335e-132	0
FOXJ2	0.274143	1.72648e-26	0
MUSTN1	0.273926	6.39606e-93	0
HCCS	0.273915	1.52617e-29	0
TMTC4	0.273913	1.03624e-12	0
FBXO45	0.273695	1.27959e-23	0
ACAP1	0.273466	9.4589e-21	0
MAD2L1BP	0.273461	1.57637e-08	0
KLHL41	0.273272	5.54932e-23	0
GLUD1	0.273145	6.94762e-26	0
LYSMD3	0.272764	1.28338e-21	0
DCTN6	0.27273	3.39967e-17	0
DCUN1D5	0.272485	1.2411e-58	0
EEF1B2	0.272471	0.00148152	0
GOT2	0.272354	4.0678e-167	0
MRPL36	0.271753	5.95903e-99	0
RPS9	0.271659	5.55742e-15	0
MRPS35	0.271255	2.91502e-73	0
TRIM52-AS1	0.271135	4.11075e-45	0
LTV1	0.271093	6.39511e-18	0
TACO1	0.270771	8.05997e-55	0
C12orf73	0.270619	6.00275e-42	0
ALAS1	0.270318	9.11539e-54	0
NENF	0.270257	2.14769e-130	0
GTPBP8	0.269937	1.59077e-35	0
GLRX2	0.269798	2.58881e-35	0
TAF7	0.269782	1.55211e-101	0
EIF2B2	0.269733	1.01791e-18	0
RPL6	0.269634	3.46487e-39	0
SGCB	0.26902	4.39846e-135	0
ALDH1A1	0.268949	2.9899e-41	0
AP2S1	0.268616	1.0345e-99	0
SPRYD7	0.267985	1.59706e-46	0
MT-ATP6	0.26789	5.63753e-250	0
ENDOG	0.267534	1.40471e-125	0
PIN4	0.267458	9.628e-57	0
IPO7	0.267431	2.8345e-122	0
IER5	0.267369	9.47037e-21	0
ZNF770	0.267318	5.40784e-42	0
NUDCD2	0.266982	1.19759e-41	0
SLC38A1	0.266413	6.67842e-26	0
LMOD3	0.265975	2.47049e-153	0
ARL6IP5	0.265604	1.98302e-144	0
CHCHD2	0.265016	8.44634e-160	0
RAN	0.264984	1.26417e-92	0
PCMT1	0.264821	1.3331e-84	0
BZW2	0.264769	1.33117e-151	0
TFAM	0.264671	1.35881e-38	0
AC087672.1	0.264262	1.04016e-14	0
RNASEK	0.263961	1.61624e-154	0
RPS13	0.263754	4.94721e-26	0
ALDH6A1	0.263689	7.70211e-48	0
KLHDC2	0.263429	5.33464e-86	0
MRPL2	0.26336	3.00196e-76	0
CDKN1C	0.263274	1.41465e-38	0
RPS27L	0.263209	6.42799e-97	0
APOO	0.262668	1.13865e-37	0
MT-CO1	0.262627	0	0
RPL14	0.262625	1.44392e-10	0
TOMM6	0.262138	2.63382e-119	0
MRPL34	0.262099	2.68002e-129	0
NPC2	0.262074	1.43402e-16	0
NELFE	0.262036	1.5078e-22	0
FXYD1	0.261732	1.45079e-62	0
SNHG9	0.261592	1.09633e-09	0
EIF3A	0.26139	4.95413e-160	0
C22orf39	0.261249	2.0244e-96	0
EIF1	0.261229	6.90218e-05	0
LEO1	0.261065	6.66836e-25	0
WDR83OS	0.260877	7.90828e-131	0
CNBD2	0.260785	6.41565e-25	0
ZNHIT3	0.260652	1.86158e-41	0
MICOS13	0.260432	2.99124e-154	0
PSMD2	0.260007	4.14953e-142	0
SPATA5L1	0.259817	4.98211e-11	0
GRSF1	0.259607	7.59686e-136	0
COPS8	0.259438	9.81328e-85	0
TNNI1	0.259256	1.75448e-126	0
SMCO1	0.259127	3.44596e-88	0
PPCS	0.259015	1.36411e-31	0
FAM200B	0.258993	5.19818e-30	0
CDKN1B	0.258623	9.09236e-56	0
MAPKAPK5-AS1	0.258599	4.44308e-23	0
ABHD10	0.258572	2.1035e-20	0
HSPB6	0.258436	2.89173e-108	0
DLD	0.258427	6.14596e-109	0
NET1	0.25825	3.97961e-22	0
SNRPB2	0.258087	3.25236e-32	0
RPL18	0.258013	4.35266e-49	0
MYL3	0.25782	1	0
GAS5	0.257621	7.09435e-60	0
RRAGA	0.257096	8.821e-50	0
NCK1-DT	0.256958	1.78524e-17	0
ST13	0.256714	4.27799e-173	0
PDHA1	0.25648	8.08617e-114	0
GSTP1	0.256439	1.73418e-156	0
CCDC43	0.256228	5.21626e-106	0
FAM210B	0.256066	1.64598e-77	0
SMIM19	0.25556	5.85046e-75	0
TMEM251	0.255482	9.83598e-20	0
AHSA1	0.255318	3.27265e-64	0
PIGP	0.255261	2.52234e-40	0
ETFA	0.255183	8.98824e-117	0
EIF2S1	0.255077	3.12062e-42	0
POLR2K	0.254569	1.61195e-18	0
SCP2	0.254007	7.09064e-113	0
TIMMDC1	0.254006	4.84936e-77	0
RAMAC	0.253822	3.99951e-13	0
MRPL20	0.253568	7.59147e-167	0
ERAP1	0.252759	5.59976e-24	0
HPRT1	0.252385	6.20523e-10	0
ATMIN	0.252276	4.28301e-34	0
ACBD5	0.25092	1.35155e-37	0
TALDO1	0.250829	1.35491e-57	0
ENY2	0.250793	1.26162e-65	0
TMSB10	0.250613	1.02841e-34	0
BMI1	0.250536	9.14328e-51	0
ISCU	0.250355	1.05633e-107	0
POLR2J	0.250219	3.36707e-152	0
CMC2	0.250035	2.26263e-57	0
BHLHE41	0.249999	2.01858e-103	0
KIF5B	0.249547	3.34918e-127	0
TWF2	0.249485	6.82566e-109	0
ATP5MC3	0.249394	7.3856e-141	0
MRPS14	0.249241	7.86092e-40	0
HIGD2A	0.248899	1.58918e-160	0
UBE2D1	0.248841	3.32952e-155	0
CRYAB	0.248144	0.0341646	0
BECN1	0.247454	5.76001e-43	0
CHMP2B	0.247216	1.3185e-32	0
DNAJA2	0.24716	1.53957e-72	0
PDCD2	0.247016	1.17013e-38	0
CIB1	0.246946	2.22264e-28	0
MRPL40	0.246811	2.15807e-102	0
VPS37A	0.246749	6.612e-64	0
RNF5	0.246697	1.75298e-55	0
MRPS12	0.246678	3.00252e-53	0
MRPL47	0.24635	3.31261e-32	0
RNF6	0.245473	8.36677e-36	0
FECH	0.245313	7.54002e-39	0
YWHAG	0.244952	8.14308e-161	0
MRPL32	0.24445	1.38496e-30	0
CCT5	0.244378	9.68714e-64	0
NAP1L1	0.244222	2.34063e-122	0
ZMAT2	0.244211	1.19813e-73	0
IL17D	0.243989	5.64044e-91	0
NDUFB8	0.243803	1.23254e-169	0
CIAO2A	0.243682	3.32411e-68	0
TMEM106B	0.243418	6.88548e-72	0
MRPL14	0.243268	1.93829e-159	0
SNX3	0.24324	7.14833e-129	0
PGRMC2	0.242779	7.85568e-51	0
NCOA4	0.242566	1.99275e-86	0
VDAC3	0.242542	6.94207e-177	0
TNIP2	0.242472	2.7757e-24	0
NDUFAB1	0.242362	2.31266e-170	0
HSP90AB1	0.242326	5.88801e-91	0
CCT7	0.242203	3.40806e-119	0
PA2G4	0.240976	4.10305e-102	0
EIF3H	0.24086	7.198e-169	0
RPL11	0.240819	2.66971e-22	0
ADI1	0.240746	1.88688e-137	0
SKP1	0.240416	3.40563e-177	0
LAGE3	0.240409	3.05654e-30	0
ITM2B	0.239974	5.08085e-128	0
ATRAID	0.239793	1.11958e-77	0
MRPS24	0.239369	6.26439e-174	0
AIMP1	0.239139	3.19711e-81	0
TMF1	0.239031	3.32221e-40	0
HERPUD1	0.238776	1.35444e-74	0
FGD5-AS1	0.23856	9.51437e-72	0
RHOB	0.238224	1.01602e-21	0
TMEM9B	0.238103	8.70087e-29	0
MAP6D1	0.237386	2.67423e-25	0
MGST3	0.23671	2.02245e-173	0
SLU7	0.23668	1.68744e-36	0
SMDT1	0.236187	1.83509e-168	0
CLPX	0.236116	8.79416e-73	0
CCDC127	0.235982	3.52085e-35	0
XIRP2	0.235736	2.86813e-51	0
MIEN1	0.234684	3.04765e-35	0
MAP1S	0.234399	4.60058e-14	0
AC009948.3	0.234224	1.13879e-32	0
DDB1	0.234082	5.65055e-109	0
FAM136A	0.233867	3.54699e-26	0
C2orf69	0.233529	7.63604e-14	0
CSTB	0.233072	4.30154e-55	0
MRPL35	0.233014	2.84559e-43	0
DBI	0.232903	4.25636e-131	0
RPS7	0.232808	3.90358e-53	0
LRIF1	0.23279	2.10513e-39	0
MRPL44	0.232313	5.75512e-26	0
DMAC2L	0.232149	3.63497e-69	0
PPP1R2	0.231838	7.13142e-128	0
EBNA1BP2	0.231782	7.33188e-31	0
YBX3	0.231754	1.39383e-23	0
CROT	0.231589	1.23313e-21	0
STRAP	0.231076	2.85904e-71	0
CBX1	0.231008	1.12735e-57	0
GNPDA1	0.230723	2.20769e-20	0
JPT1	0.230678	2.94701e-55	0
ABRA	0.230393	6.95951e-132	0
OGFOD1	0.229664	2.25942e-64	0
TMEM167A	0.229558	3.13322e-20	0
TTC1	0.229321	1.481e-113	0
SRRD	0.229231	8.15514e-50	0
IK	0.229178	7.97231e-73	0
PPP1R14B	0.229095	2.82372e-181	0
LMO4	0.228886	7.49487e-75	0
ALKBH7	0.228807	2.47089e-171	0
ATP5MC2	0.228527	3.74485e-44	0
PLAC9	0.228351	6.79191e-17	0
CAPZA2	0.228082	4.46536e-170	0
PEBP1	0.22774	4.11591e-183	0
SOD1	0.227423	1.18383e-155	0
SQSTM1	0.227343	6.30836e-203	0
LSMEM1	0.227338	4.33509e-68	0
ZBTB45	0.227248	3.45254e-13	0
LSM8	0.227013	1.67249e-46	0
COX11	0.226724	5.93311e-57	0
MZT2B	0.226585	3.19394e-163	0
TMEM160	0.226528	2.32665e-91	0
CD93	0.226301	0.00268582	0
PSMD12	0.22556	6.72563e-99	0
RAD21	0.224819	1.09371e-93	0
GYG1	0.224536	6.95158e-171	0
UBLCP1	0.22441	2.8672e-12	0
BUD31	0.224237	4.4933e-21	0
RNASEH2C	0.224044	3.80358e-39	0
ALDH5A1	0.223468	1.06303e-59	0
PPP2CA	0.223302	1.37324e-79	0
TRIM23	0.223295	2.31629e-43	0
PFN2	0.223256	1.40809e-107	0
MYCBP	0.223234	2.42653e-14	0
MMUT	0.223025	5.33081e-34	0
UXT	0.22297	1.50626e-70	0
NDUFS4	0.222617	9.25007e-179	0
CCT8	0.222335	9.00918e-75	0
OSTM1	0.222251	2.03831e-09	0
PCBD1	0.22211	6.78718e-110	0
IMMT	0.22192	5.10239e-141	0
DYNC1H1	0.221549	8.02587e-156	0
SVBP	0.22131	3.039e-45	0
SATB1	0.22127	2.24177e-79	0
MED21	0.221238	3.01841e-32	0
FAM210A	0.221193	1.45953e-56	0
VPS16	0.220911	3.18801e-18	0
WSB2	0.22086	6.73781e-53	0
NME6	0.220813	1.04775e-22	0
ARMT1	0.219696	1.7667e-17	0
IMPAD1	0.219181	1.58605e-39	0
BLOC1S1	0.219163	8.99109e-163	0
PPP1R11	0.218817	1.89905e-23	0
DHFR	0.218303	6.30243e-40	0
PFDN6	0.218303	1.32181e-27	0
LYPLA1	0.217823	4.92915e-62	0
DUSP28	0.217624	1.44483e-41	0
PINK1	0.217002	2.82502e-171	0
ITGB1	0.216244	1.02017e-121	0
UBE2A	0.21618	7.64822e-56	0
SC5D	0.215526	2.58096e-11	0
REEP5	0.215177	7.19579e-100	0
RANBP1	0.215168	2.10145e-49	0
ARL3	0.214967	2.64719e-23	0
TRMT10C	0.214938	1.70218e-43	0
CHCHD10	0.214938	0.000367534	0
RAB4A	0.214673	2.81626e-84	0
DHRS7C	0.21443	5.67679e-129	0
TMED5	0.214345	2.10873e-65	0
RIOK1	0.214089	3.40957e-13	0
RPL26L1	0.21365	1.43379e-23	0
CISD3	0.213615	2.09535e-99	0
CIPC	0.213051	9.77588e-114	0
TSTD1	0.212895	3.14267e-22	0
TOMM20	0.212888	2.73103e-131	0
TMEM109	0.212839	2.05041e-49	0
TM2D2	0.212425	1.18524e-10	0
SNRNP27	0.212289	5.06613e-65	0
CRYL1	0.211956	7.18662e-52	0
EIF4G2	0.211839	1.35168e-190	0
LAMP2	0.211836	2.03141e-114	0
RNF11	0.211814	1.06503e-121	0
FTH1	0.21155	3.90798e-11	0
CD63	0.211395	5.40838e-168	0
NME1	0.21128	8.00524e-18	0
CANX	0.2108	1.37048e-70	0
BLVRA	0.210796	3.50769e-47	0
DPY30	0.210617	3.10658e-45	0
PEX19	0.210482	2.32356e-57	0
GOT1	0.210436	2.05429e-141	0
NDUFS2	0.21009	2.89632e-174	0
RMDN1	0.209898	2.48491e-69	0
PNRC2	0.209874	2.24496e-55	0
ECI2	0.20979	5.11747e-133	0
YIPF5	0.208934	1.66273e-12	0
C9orf78	0.208476	1.37132e-64	0
S100A10	0.208133	9.41633e-18	0
RANBP2	0.207925	1.67411e-107	0
CTSF	0.20736	3.09988e-58	0
DHRS4L2	0.206998	1.52045e-31	0
RPSA	0.206075	3.04336e-153	0
YME1L1	0.205971	1.16827e-124	0
NIPSNAP3B	0.205457	5.12555e-43	0
UBC	0.205305	8.791e-146	0
BNIP2	0.205279	5.79401e-58	0
ETAA1	0.20522	8.15921e-22	0
DEK	0.205217	4.1076e-177	0
MCFD2	0.205102	1.64094e-49	0
C16orf91	0.204924	2.31408e-15	0
LLPH	0.204923	6.945e-24	0
RNF7	0.204516	2.9824e-130	0
UTP11	0.20365	3.60183e-156	0
CBX3	0.20363	1.50896e-58	0
MYL6B	0.203426	6.00188e-127	0
PSME2	0.203371	7.54056e-43	0
EBAG9	0.203222	1.17825e-51	0
TMEM18	0.202693	2.6234e-49	0
DAD1	0.202564	9.29546e-89	0
HMBS	0.202504	9.42827e-32	0
SH3GLB1	0.202195	1.61351e-161	0
CNBP	0.202088	7.61163e-156	0
UQCRC2	0.201885	3.14855e-206	0
RRP15	0.201885	2.6187e-44	0
THAP12	0.201284	3.28555e-43	0
FAM162A	0.201145	4.6914e-107	0
CUL2	0.201122	1.28721e-75	0
MTRNR2L8	0.200941	1.06681e-134	0
EIF5	0.200412	2.62061e-176	0
SLC35B1	0.200371	1.94201e-41	0
RIOX2	0.200365	1.87854e-30	0
C11orf58	0.200262	1.83354e-134	0
WBP11	0.20021	7.17955e-55	0
GPNMB	0.200186	2.00804e-13	0
GFER	0.199896	3.33978e-49	0
FXR1	0.199255	1.4178e-189	0
PTPMT1	0.199216	2.20972e-28	0
ERLEC1	0.199011	2.82073e-59	0
ATP6AP1	0.198894	1.25647e-34	0
HSPB3	0.198656	3.20997e-95	0
CCT3	0.198584	4.42996e-110	0
H2AFV	0.198456	9.68244e-131	0
DBT	0.198167	8.78607e-52	0
PSMD8	0.198161	1.97663e-154	0
FASTKD5	0.198141	3.31552e-22	0
MT-CO2	0.19803	2.90292e-133	0
ANKRD35	0.198004	1.42516e-28	0
NT5C3A	0.197927	7.31517e-76	0
GABARAP	0.197673	7.86705e-192	0
SARAF	0.197648	3.88417e-83	0
CCDC90B	0.197533	6.74493e-38	0
ZFAND5	0.197422	9.61894e-176	0
ACSL4	0.197352	3.30417e-21	0
HADH	0.197257	1.27108e-158	0
G6PC3	0.197192	4.33542e-15	0
RIOK3	0.19717	1.18427e-108	0
PPP1R3C	0.197039	6.29096e-178	0
COPS2	0.196763	1.84471e-91	0
NAXE	0.196604	3.54901e-54	0
ZCRB1	0.195924	2.11597e-108	0
GLT8D1	0.195583	3.86469e-13	0
ARV1	0.195242	9.40225e-21	0
GID4	0.195206	1.69215e-34	0
DNAJC15	0.194778	5.45976e-130	0
ELK1	0.19466	1.07199e-11	0
HPF1	0.194469	6.08167e-27	0
PSME3	0.19436	2.63341e-31	0
METAP2	0.194243	1.42565e-125	0
SGSM1	0.194054	4.07499e-09	0
EIF3M	0.19404	1.66515e-70	0
ARPP19	0.193831	6.17587e-145	0
TRAPPC5	0.193747	1.04733e-155	0
AP002748.4	0.193193	1.65274e-18	0
SUPT4H1	0.19298	1.4029e-41	0
TIMM29	0.192664	2.35879e-23	0
IDH3B	0.192331	1.81998e-106	0
APEH	0.191971	1.65881e-57	0
METTL7A	0.191919	1.75999e-60	0
ICMT	0.191887	3.67577e-24	0
AC093323.1	0.191794	5.08839e-10	0
TIMM17A	0.191759	3.76926e-94	0
LINC02328	0.191486	8.01932e-08	0
PSMA7	0.190823	2.09536e-192	0
HLA-DRB1	0.190682	3.40402e-14	0
NDUFS8	0.190404	2.77058e-191	0
SRP9	0.190308	1.95176e-122	0
SMIM13	0.190176	2.23317e-26	0
VCP	0.189921	1.98868e-186	0
MRPL24	0.189907	8.36031e-74	0
TTN	0.189892	0	0
KMT2E-AS1	0.18984	1.26477e-46	0
DHRS7	0.189634	3.89308e-112	0
SYF2	0.189125	1.28349e-68	0
TRAPPC2L	0.18897	4.68352e-69	0
EXOSC4	0.188884	2.00387e-15	0
MRPS18B	0.188775	7.0896e-140	0
EIF3K	0.188638	5.17108e-178	0
EBLN3P	0.188494	3.24983e-23	0
DYNC1LI1	0.18845	1.03264e-62	0
PFDN4	0.188238	5.0283e-41	0
TMEM115	0.187732	5.06276e-14	0
HK2	0.187385	9.06238e-22	0
PTGR2	0.187288	6.62264e-40	0
DDT	0.18717	7.43546e-111	0
MTCH2	0.186991	3.44489e-80	0
NGRN	0.186875	1.79327e-156	0
ACADM	0.186853	8.90466e-177	0
PRDX4	0.18655	8.61935e-22	0
SEC23A	0.186223	1.65641e-48	0
SSR3	0.18618	1.91809e-50	0
ZFPL1	0.186171	4.90922e-23	0
DAZAP2	0.185761	1.84115e-43	0
DIS3	0.184427	8.17937e-31	0
PLIN2	0.184262	3.5329e-107	0
PLAAT3	0.183884	9.20435e-113	0
AIDA	0.183754	1.66486e-30	0
LARP7	0.183687	8.71317e-50	0
HNRNPH2	0.183613	2.87449e-40	0
SAP18	0.183602	3.58075e-151	0
EEF1E1	0.183486	3.59247e-18	0
VAMP3	0.183406	3.14421e-56	0
PPP1R7	0.183297	2.51588e-64	0
MB	0.183137	2.40407e-76	0
ECH1	0.182587	1.13203e-187	0
PSMC2	0.181998	2.71565e-71	0
SEH1L	0.181759	6.34385e-13	0
C5orf15	0.181409	3.94361e-26	0
IRF2BPL	0.181386	1.03448e-29	0
MT-CYB	0.180945	3.34902e-71	0
POLR1D	0.180342	1.02735e-117	0
PHF10	0.180232	6.30609e-97	0
AC006064.4	0.180066	5.73053e-72	0
ACTN2	0.17976	0.00179998	0
DNAJC21	0.179752	7.67996e-120	0
ZNF181	0.17969	6.07402e-35	0
CHCHD4	0.179633	6.97932e-26	0
ATP2A2	0.178613	4.74743e-30	0
AL136038.5	0.178501	2.57714e-13	0
CDC37L1	0.178453	3.60682e-111	0
CHMP1B	0.178446	2.03997e-27	0
RNF14	0.178299	2.50434e-43	0
ANP32B	0.178122	2.35269e-67	0
NAA30	0.177756	5.07185e-61	0
ALDH9A1	0.177664	4.19149e-67	0
MTIF2	0.177311	9.49819e-50	0
EIF4EBP3	0.177121	1.58885e-35	0
SNHG16	0.177037	1.9016e-149	0
CFL1	0.17698	2.39438e-74	0
ISOC2	0.17668	2.49443e-96	0
ACP1	0.176636	5.97922e-72	0
ILF2	0.176295	7.87811e-42	0
SUGT1	0.17575	4.38503e-81	0
PPP1R16A	0.175671	6.40583e-159	0
ANXA5	0.175554	1.14861e-47	0
HSPA1B	0.1753	2.36948e-50	0
CMAS	0.175008	4.38004e-29	0
DENR	0.174993	6.41352e-68	0
COPRS	0.174444	2.38412e-45	0
PRKAR1A	0.174249	4.20885e-106	0
DANCR	0.173845	1.7751e-91	0
HSDL2	0.173745	6.44995e-138	0
C5orf24	0.173677	5.04204e-48	0
ASF1A	0.173643	1.32913e-22	0
RPL18A	0.173413	1	0
AQP4	0.173336	1.06118e-122	0
SYPL1	0.173318	2.62084e-119	0
TNNT1	0.173276	1.97807e-146	0
IFRD2	0.173267	3.25783e-80	0
CDC42EP3	0.17314	1.58856e-55	0
TOMM22	0.172652	4.00822e-58	0
PURB	0.171928	1.71214e-42	0
ZNRD1	0.171663	4.1496e-24	0
EDF1	0.171593	2.18486e-173	0
VIM	0.171065	5.11426e-38	0
ANKRD30BL	0.171051	5.84902e-24	0
DDX3X	0.171013	1.21633e-87	0
MED10	0.170815	1.86793e-28	0
OSGIN2	0.170788	8.8614e-13	0
THAP9	0.170708	2.60228e-21	0
RPS5	0.170502	1.07017e-34	0
SNRPA	0.170494	4.09937e-23	0
SLBP	0.170441	1.3207e-14	0
RBM18	0.170435	2.21335e-43	0
RPS2	0.170246	0.000485228	0
PAICS	0.170245	8.77157e-24	0
NDUFS3	0.170231	1.07003e-160	0
UBQLN2	0.170148	1.84336e-45	0
NDUFB5	0.170096	1.46652e-162	0
CELSR2	0.169851	1.00013e-19	0
RCN1	0.169844	9.42585e-14	0
MED30	0.169613	3.27801e-08	0
PPIA	0.16937	2.45272e-77	0
BUD23	0.169275	9.50671e-60	0
HNRNPK	0.169249	3.58596e-148	0
NUDT8	0.169053	3.85648e-124	0
SRI	0.16903	1.03869e-23	0
COQ8A	0.168376	1.78088e-142	0
JTB	0.168113	2.70652e-125	0
ARF6	0.167843	2.63242e-30	0
SIKE1	0.167789	1.07434e-55	0
ATP23	0.1676	7.24308e-39	0
RBM8A	0.167575	3.17261e-68	0
ADAM9	0.167537	7.20054e-39	0
RASGEF1B	0.167428	1.89251e-128	0
DYNLL1	0.167333	1.94943e-59	0
FRG1	0.167231	6.07613e-29	0
PGK1	0.167223	3.08308e-199	0
SCNM1	0.167173	1.91665e-68	0
TOMM70	0.167087	3.38167e-95	0
RPAIN	0.166479	5.61061e-84	0
DCAF6	0.166176	9.93988e-188	0
CWC15	0.166077	2.17555e-136	0
GPX4	0.165811	8.25542e-189	0
DPM1	0.16579	6.00842e-47	0
SLC25A11	0.16569	3.29641e-156	0
RSL1D1	0.165309	1.53855e-119	0
MPND	0.165182	3.75201e-24	0
ZNF518B	0.165004	1.4554e-16	0
RBM7	0.164699	3.63779e-15	0
NUCKS1	0.164584	1.42015e-204	0
ARRDC3	0.163918	1.26485e-30	0
VTA1	0.163686	4.32693e-51	0
PDCL3	0.163683	4.06045e-43	0
EIF4E3	0.16361	2.5251e-66	0
RPAP3	0.163401	7.35976e-40	0
PPDPF	0.163355	1.06536e-199	0
CSDE1	0.163354	1.75716e-107	0
HSPB1	0.16329	6.37712e-97	0
SELENOT	0.163197	4.29295e-48	0
CAT	0.162986	2.45983e-67	0
TMEM9	0.162709	3.86448e-33	0
FAM174A	0.162626	1.25851e-43	0
ARPC5L	0.16191	3.90552e-81	0
MAD2L2	0.161779	1.83671e-27	0
FABP5	0.16168	5.62087e-12	0
HCFC1R1	0.161519	8.96918e-185	0
BOLA1	0.161456	1.41767e-17	0
GLRX	0.161235	3.64646e-37	0
FAM204A	0.160804	5.40654e-58	0
ZNF511	0.160708	2.07144e-86	0
ENDOD1	0.160467	2.19572e-93	0
CRIPT	0.160393	3.44616e-31	0
OTUD6B	0.160135	2.36322e-20	0
TARSL2	0.160078	6.58798e-154	0
ZNRD2	0.159911	9.95252e-30	0
MRPL28	0.159907	3.86378e-62	0
NIPSNAP2	0.159848	7.39128e-214	0
TMEM159	0.159822	6.18073e-115	0
TPRG1L	0.159667	7.03303e-56	0
RTN4	0.159534	1.38691e-214	0
AC036176.1	0.159145	3.42659e-20	0
SEC13	0.158828	4.8898e-80	0
NAA50	0.158453	4.31827e-172	0
POLR2C	0.158429	9.27076e-47	0
CNIH4	0.158356	2.75913e-45	0
TADA2B	0.157889	5.11272e-62	0
PTP4A2	0.157865	4.4554e-175	0
NDUFAF3	0.157469	2.45672e-113	0
PLEKHF2	0.157353	1.05477e-19	0
SMPD1	0.157224	3.0106e-31	0
STIP1	0.156748	5.08947e-78	0
CLCC1	0.155916	4.59571e-36	0
GRHPR	0.155469	2.33457e-97	0
SURF1	0.154667	1.89581e-71	0
DHX29	0.154043	3.8437e-81	0
LSM1	0.153722	5.81201e-31	0
SH3BGR	0.153487	1.81489e-205	0
PDP1	0.153156	5.74866e-74	0
PNKD	0.152632	7.18344e-122	0
EMC4	0.152172	5.86719e-106	0
DDX24	0.151882	4.64677e-132	0
C9orf16	0.151568	1.64916e-30	0
MAT2B	0.151489	5.79198e-35	0
TNNI3	0.151008	9.12923e-22	0
PSMA1	0.151006	7.08778e-91	0
CYB5R1	0.150952	6.80995e-196	0
PLA2G12A	0.150793	1.27512e-68	0
UBE2Q2	0.150312	4.70013e-30	0
ETF1	0.15013	7.33805e-79	0
MRPL13	0.149701	1.4021e-47	0
ARL1	0.149597	3.04347e-37	0
PSIP1	0.149429	2.73416e-66	0
EIF3D	0.149029	7.65137e-60	0
C12orf29	0.148981	1.02924e-08	0
DDA1	0.148951	9.50243e-26	0
DESI1	0.148767	1.66208e-35	0
CMC1	0.148766	3.07802e-74	0
CRYM	0.148761	5.31699e-32	0
PSMA3	0.148735	3.4935e-81	0
MAP7D3	0.148705	1.93285e-15	0
PAIP2B	0.148253	3.62215e-89	0
YWHAH	0.14803	1.26704e-44	0
MRPL4	0.147868	1.04332e-66	0
MRPL55	0.14785	6.80145e-68	0
NDUFS7	0.147781	2.4549e-179	0
IMPA1	0.147643	4.7212e-15	0
AMZ2	0.147202	2.04562e-50	0
AKTIP	0.147145	9.91983e-93	0
ETFRF1	0.14684	2.46432e-71	0
TMEM126B	0.146838	2.15037e-40	0
PSMB1	0.14671	3.24182e-166	0
MIIP	0.146704	4.93075e-18	0
S100A4	0.146549	1.43785e-24	0
MEGF9	0.146513	5.98086e-27	0
XRCC5	0.146278	1.89742e-120	0
MDH2	0.146276	2.25442e-197	0
BOD1	0.14627	1.4378e-68	0
ARPC3	0.146249	1.00468e-44	0
KLHL40	0.146114	1.69712e-122	0
YWHAE	0.146028	2.31859e-210	0
C18orf21	0.145363	5.83948e-22	0
EIF3B	0.145348	4.24466e-108	0
ENOPH1	0.145072	1.53912e-08	0
CALU	0.145064	2.46154e-63	0
NHP2	0.144983	2.10608e-84	0
HOXC10	0.144964	4.68479e-116	0
NBR1	0.144957	4.37559e-95	0
INTS13	0.144952	4.22972e-22	0
ETFDH	0.144898	1.15451e-77	0
PAIP2	0.144802	2.37683e-126	0
MRFAP1	0.144735	8.49117e-139	0
PARP1	0.144665	1.28821e-126	0
LRRC39	0.144605	1.8044e-215	0
COPB1	0.144567	2.74461e-47	0
TUSC2	0.144516	1.7117e-47	0
ENO1	0.144464	2.3565e-66	0
IFI27L1	0.144458	2.22694e-20	0
AC034139.1	0.143843	2.75854e-26	0
HIKESHI	0.143619	5.22371e-101	0
GPATCH4	0.143608	6.02855e-39	0
RFXANK	0.1434	4.00439e-31	0
PRADC1	0.1433	8.68317e-113	0
AK6	0.143121	4.41186e-50	0
HSPA4	0.143098	9.6557e-82	0
SUCLG1	0.143051	1.02711e-156	0
XRCC6	0.14295	2.3625e-131	0
ATPAF1	0.142944	3.66197e-142	0
ATIC	0.142585	1.14986e-34	0
CENPV	0.141905	9.14596e-49	0
THUMPD3	0.14168	6.93483e-39	0
DUSP23	0.141602	1.48496e-28	0
PPIC	0.141554	7.0265e-27	0
NUDT14	0.141479	9.98689e-45	0
MRPL27	0.140511	8.44715e-130	0
DSTN	0.140288	8.02358e-64	0
SLN	0.140178	6.6474e-13	0
POLE3	0.139846	9.5953e-41	0
C2orf74	0.139589	3.76572e-37	0
PSMD13	0.139339	5.0716e-93	0
IRGQ	0.138683	2.80843e-34	0
MTURN	0.138663	2.00067e-45	0
AC100810.1	0.138634	3.21228e-33	0
HOXA9	0.138578	8.18949e-39	0
AP4B1	0.138514	2.14684e-16	0
GRPEL1	0.138464	1.18616e-56	0
VKORC1	0.138197	2.54976e-17	0
ADSSL1	0.138128	2.43775e-152	0
ZC3H15	0.138049	1.14329e-87	0
SYDE2	0.137887	5.08983e-14	0
CAVIN4	0.137837	1.79069e-148	0
SMIM15	0.137812	1.07868e-10	0
AL137246.2	0.137802	1.6723e-90	0
PARK7	0.137625	2.9918e-215	0
USP38	0.137606	2.35896e-86	0
CAVIN3	0.137211	7.26951e-15	0
VTI1B	0.137106	8.91579e-101	0
LAPTM4A	0.136276	4.99179e-80	0
RNF128	0.136208	2.38034e-13	0
RAB5A	0.136081	1.10501e-46	0
GUF1	0.136027	3.57522e-55	0
REX1BD	0.135924	2.05781e-172	0
C1GALT1	0.135768	1.21691e-53	0
SDHA	0.135649	9.93749e-214	0
NDUFAF6	0.134904	1.29468e-76	0
GTF2A1	0.134892	5.14132e-28	0
AGGF1	0.134837	2.09431e-54	0
ADH5	0.134654	7.9178e-47	0
NDUFV2	0.134627	1.51984e-210	0
ZYG11B	0.134463	1.11082e-211	0
GADD45GIP1	0.134457	1.01854e-175	0
EIF4G1	0.133969	1.42051e-217	0
HOXA10	0.133486	2.30673e-104	0
MRPS23	0.133396	6.95576e-65	0
CASQ2	0.13314	1.7277e-62	0
TUFM	0.132797	1.91607e-149	0
ISCA2	0.132745	9.65225e-47	0
DENND10	0.132665	1.07352e-23	0
SMYD2	0.132629	5.07637e-84	0
MRPS10	0.132574	2.33324e-86	0
CUL5	0.132392	5.62262e-181	0
CTNNAL1	0.131707	1.97943e-25	0
ODC1	0.131567	5.96881e-67	0
UBL7	0.131467	3.55398e-50	0
SSPN	0.131351	1.63353e-158	0
SSBP1	0.131034	4.6201e-97	0
MTERF3	0.130968	1.37739e-21	0
RAB14	0.13093	4.73616e-75	0
TARS	0.130658	3.53134e-31	0
PRSS56	0.130228	9.13969e-47	0
HINT2	0.129925	3.45241e-91	0
TPMT	0.1299	7.99569e-13	0
DDIT4L	0.129712	4.57917e-165	0
APOD	0.129677	6.593e-42	0
POLR3K	0.129319	5.02722e-22	0
LGALS3	0.129117	6.23158e-13	0
ANAPC15	0.129049	2.42235e-86	0
GLUL	0.129037	1.43457e-211	0
TUBA4A	0.128874	7.70348e-211	0
ORAI1	0.128636	7.51131e-86	0
PECR	0.128582	2.24421e-12	0
SLC40A1	0.128549	9.06751e-36	0
GOLGA7	0.128099	1.50754e-30	0
ASB8	0.128003	5.2722e-193	0
ARL14EP	0.127911	1.12925e-52	0
LMAN2	0.127895	7.84602e-38	0
BROX	0.127516	2.87494e-34	0
APIP	0.127398	1.30925e-101	0
DUT	0.127388	2.76148e-71	0
BRMS1L	0.127323	9.14175e-30	0
FABP3	0.126108	5.30354e-185	0
PRDX2	0.126028	2.21222e-205	0
UFC1	0.125994	2.32549e-62	0
NUDT1	0.125947	9.69338e-17	0
TMX4	0.125903	2.60907e-82	0
MAFB	0.1256	5.13933e-34	0
RIDA	0.125583	9.18758e-32	0
TMEM47	0.125513	8.53025e-36	0
YBX1	0.125509	2.29285e-93	0
CCDC167	0.125363	1.19663e-22	0
MSANTD4	0.12536	1.25638e-14	0
UBA5	0.125257	4.1385e-43	0
AURKAIP1	0.124877	5.26163e-197	0
LZIC	0.124668	9.18492e-46	0
DTX3L	0.124553	5.32212e-08	0
ACTR2	0.124215	5.38859e-65	0
ZDHHC4	0.124125	2.93312e-46	0
DDX21	0.124061	3.70012e-53	0
AGL	0.123684	2.57874e-80	0
RPS4X	0.123652	5.08255e-70	0
AC245407.2	0.123613	2.31403e-12	0
RTL8C	0.123353	7.73673e-99	0
TLCD4	0.123274	1.47145e-78	0
GPC4	0.122953	3.92345e-53	0
CFAP298	0.1226	7.41305e-46	0
CCDC126	0.122463	6.97378e-19	0
ING1	0.12237	4.45758e-11	0
PRPF38A	0.122267	8.57076e-25	0
MRPL43	0.122216	3.32565e-101	0
RAB21	0.121756	7.20689e-136	0
NDUFAF7	0.121406	6.56262e-26	0
UFM1	0.121264	8.03049e-32	0
EMC7	0.121204	2.2496e-42	0
PPIF	0.120809	4.96562e-60	0
COX6A1	0.120578	4.70874e-29	0
BTF3	0.120549	4.91564e-198	0
TIMM8A	0.12018	5.8619e-14	0
HSPA1A	0.120089	1.65721e-104	0
PDCD4	0.120063	1.87156e-28	0
H1F0	0.119984	1.98017e-141	0
PBDC1	0.119829	1.42211e-22	0
RAB5IF	0.119793	1.34047e-108	0
CXCL14	0.119741	6.44832e-26	0
TUBB4B	0.119381	1.71004e-105	0
HMGN2	0.119166	6.28161e-132	0
PRDX6	0.119068	9.41472e-227	0
SPTSSA	0.118461	5.0171e-14	0
NEPRO	0.118428	1.761e-31	0
ANKRA2	0.118331	2.92303e-13	0
MTFR1L	0.118091	8.73709e-108	0
ACO2	0.117986	9.81973e-220	0
TSEN15	0.117916	2.58181e-98	0
RECQL	0.117375	2.46261e-17	0
MFN2	0.117311	2.50686e-160	0
RPN1	0.117114	4.28577e-44	0
C11orf74	0.116941	2.30652e-47	0
BCKDK	0.116817	2.6206e-63	0
SHMT1	0.116727	5.14141e-45	0
PDRG1	0.116661	2.46642e-16	0
MAF	0.116447	1.15733e-158	0
NDUFA9	0.116336	2.14218e-137	0
PABPC4	0.116203	1.33295e-221	0
PPP1R3A	0.115835	1.70423e-171	0
NNT	0.115577	2.19496e-180	0
ARPC5	0.115164	6.16493e-07	0
RHOA	0.114987	6.37575e-167	0
METTL26	0.11492	2.23202e-130	0
LAMTOR4	0.114915	3.96362e-125	0
GNPAT	0.114777	4.76338e-87	0
RPP14	0.114735	1.11833e-85	0
NEDD8	0.114602	1.19174e-175	0
LDHA	0.114403	1.07677e-99	0
VMO1	0.11428	2.194e-13	0
CCNG1	0.114143	3.64937e-169	0
DUSP3	0.114096	9.0286e-202	0
VAPA	0.11409	9.94683e-180	0
CYC1	0.114076	3.30022e-228	0
SERPINA5	0.113898	1.72581e-10	0
SELENOK	0.113893	4.26147e-152	0
PDIA3	0.113836	4.28678e-36	0
BEST1	0.113717	3.15385e-36	0
SIVA1	0.113676	1.05068e-193	0
PCYOX1	0.113669	8.17398e-158	0
TAF5L	0.113579	2.3895e-21	0
RAB12	0.113546	3.03072e-161	0
MOAP1	0.113231	4.03389e-20	0
CNIH1	0.113028	1.22688e-42	0
DKC1	0.112179	6.63742e-24	0
FITM1	0.112171	1.0021e-216	0
FBXL3	0.111849	4.83309e-49	0
SCCPDH	0.111755	7.34162e-60	0
FAM207A	0.111663	1.8633e-50	0
DNAJC8	0.111343	5.89543e-66	0
MRPL15	0.111312	6.86875e-110	0
MRPS31	0.1112	2.95623e-75	0
HOXC9	0.110856	3.80869e-52	0
LUM	0.110711	4.97902e-05	0
OPA1	0.110708	2.66557e-109	0
ETFB	0.110437	4.4664e-189	0
OTUD6B-AS1	0.110299	1.40706e-49	0
POLR2F	0.110113	3.88333e-96	0
GPS1	0.109974	4.1114e-102	0
PLAA	0.10992	7.74646e-55	0
NEB	0.10959	8.14293e-211	0
C3	0.109434	4.80558e-14	0
SEPTIN7	0.109418	5.30209e-120	0
TOPORS	0.109057	3.74255e-25	0
SMARCA5	0.109042	5.04e-84	0
RWDD2B	0.108883	9.44935e-52	0
HLTF	0.108409	1.21558e-42	0
FIBP	0.108372	5.67399e-48	0
ACTC1	0.108346	1.54812e-09	0
MRPL12	0.108146	1.04361e-161	0
UBE2T	0.108037	2.75006e-11	0
SPATA24	0.107918	9.69538e-15	0
CTSL	0.107393	3.50874e-36	0
SRSF3	0.107388	2.10609e-96	0
NOC3L	0.107281	7.43652e-35	0
G3BP1	0.107175	2.32776e-131	0
TSTA3	0.107136	1.09333e-20	0
ANTKMT	0.107128	9.80438e-62	0
C1orf109	0.106854	3.87856e-10	0
ATP1A1	0.10666	1.36527e-25	0
FUNDC2	0.106595	9.23991e-217	0
NRXN3	0.106587	4.8283e-12	0
EFCAB14	0.106518	1.27955e-67	0
GRTP1-AS1	0.10614	3.17506e-21	0
CYB5A	0.105693	3.8604e-30	0
COX7A2L	0.10556	2.07387e-79	0
MRFAP1L1	0.104673	1.08928e-38	0
RELA	0.104651	1.7569e-22	0
PEA15	0.104606	3.30386e-18	0
CDC5L	0.104337	6.39731e-93	0
XIRP1	0.104319	4.1164e-130	0
USP13	0.104214	4.2908e-187	0
COQ3	0.104152	1.77821e-29	0
FAM229B	0.103485	2.84029e-19	0
SLK	0.10346	6.9487e-84	0
PHB2	0.10324	1.95046e-176	0
MPP1	0.103191	7.3138e-23	0
NUDT9	0.102948	3.54344e-48	0
CASD1	0.102936	2.72389e-51	0
AIMP2	0.102613	2.4045e-123	0
EEF1A1	0.102595	4.09354e-75	0
TFB2M	0.102468	1.59195e-21	0
CSE1L	0.102406	5.91523e-67	0
ERGIC2	0.10232	2.35244e-37	0
LSM2	0.102202	4.32634e-52	0
FIS1	0.102147	7.35734e-216	0
MRPL19	0.101905	1.24766e-126	0
DEXI	0.101752	2.92276e-130	0
RPP25L	0.101532	1.02402e-98	0
BLVRB	0.101423	2.60657e-179	0
LEPROT	0.101372	1.4791e-28	0
LRRC47	0.101251	4.71967e-97	0
ARL2	0.100828	1.23532e-114	0
CD81	0.100603	5.49602e-67	0
GORASP2	0.100593	1.5283e-38	0
SARS	0.100413	3.85518e-86	0
MAD1L1	0.100176	4.94476e-217	0
DARS	0.100054	1.90106e-96	0
KCTD2	0.100025	1.39107e-25	0
DHX36	-0.100468	3.7897e-126	0
TMEM52	-0.100478	0	0
HUS1	-0.100513	5.74323e-39	0
MFAP1	-0.100533	3.86978e-36	0
KIAA1109	-0.100704	5.18092e-175	0
EIF1AD	-0.100711	1.71654e-19	0
ZNF524	-0.100842	1.99143e-78	0
ADRM1	-0.100852	5.84856e-129	0
COQ7	-0.101394	2.40123e-49	0
ASAH1	-0.101534	1.79956e-119	0
ELAC2	-0.101735	2.97708e-55	0
SERPINF1	-0.101792	6.49923e-252	0
TNIP1	-0.102106	1.13929e-186	0
SUOX	-0.102152	7.57529e-33	0
ESRRA	-0.102197	3.52778e-125	0
GFPT1	-0.102257	5.00315e-47	0
PPIB	-0.102489	1.78217e-28	0
PPP2R5D	-0.102564	7.58318e-43	0
LAMTOR1	-0.102629	6.87289e-140	0
AK1	-0.102653	7.13281e-187	0
ICE1	-0.102975	2.34458e-98	0
JKAMP	-0.103096	7.31537e-52	0
ATP2A1-AS1	-0.103516	1.6954e-66	0
ALKBH8	-0.103825	1.15889e-23	0
TSTD2	-0.103882	7.36524e-59	0
CDK4	-0.103904	4.13339e-25	0
THAP3	-0.104046	1.77145e-26	0
USP39	-0.104247	2.31811e-61	0
AC117386.2	-0.104354	9.85306e-10	0
CCDC69	-0.104364	2.97559e-271	0
ZMYM6	-0.104481	7.56274e-30	0
EIF3G	-0.104539	3.91046e-259	0
G3BP2	-0.10465	8.85164e-174	0
MSANTD3	-0.10481	9.43136e-22	0
BAK1	-0.104921	1.22048e-13	0
PTOV1	-0.104979	4.12854e-204	0
MAPK6	-0.105155	4.72212e-137	0
MZT2A	-0.105163	3.19094e-59	0
ZNF121	-0.105258	3.66414e-24	0
DNAJC10	-0.105325	1.9769e-31	0
AC022706.1	-0.105514	2.18764e-25	0
ZNF853	-0.105907	1.35138e-23	0
HSPB8	-0.106055	0	0
ARRDC4	-0.106577	9.43072e-15	0
DDX6	-0.106657	4.07204e-135	0
IRAK1	-0.106902	1.61865e-23	0
KBTBD3	-0.106966	3.41643e-20	0
PANK4	-0.107164	6.50521e-48	0
ZBTB10	-0.107168	2.86876e-37	0
ARL8B	-0.107198	4.40102e-112	0
CDKN2C	-0.107419	1.05976e-14	0
IL32	-0.107685	8.37157e-90	0
PAQR3	-0.107935	2.19813e-12	0
NUP58	-0.108008	4.41624e-60	0
CMYA5	-0.108208	2.38816e-14	0
MRPS27	-0.108591	1.68032e-80	0
POLB	-0.10871	3.34263e-62	0
YIPF7	-0.108765	2.00822e-122	0
SDAD1	-0.108782	4.87092e-41	0
CSNK1G3	-0.108852	2.02776e-47	0
FLAD1	-0.108897	1.06279e-34	0
AP003469.4	-0.109485	8.99842e-16	0
MBNL1-AS1	-0.109756	9.7673e-234	0
GMCL1	-0.109779	1.49277e-26	0
CKAP4	-0.109852	5.63803e-18	0
TP53BP2	-0.110073	6.35921e-37	0
NDUFAF5	-0.110356	2.63299e-62	0
PABPC1	-0.110359	3.50196e-88	0
VPS25	-0.110487	6.04989e-44	0
TRAPPC8	-0.110553	1.71493e-94	0
EMC1	-0.110561	3.21111e-39	0
MDFIC	-0.110744	9.40871e-85	0
BCL2L12	-0.110802	2.41907e-36	0
ZDHHC7	-0.110969	3.21823e-87	0
PRELID1	-0.111038	8.46918e-22	0
CDIPT	-0.111044	1.0305e-25	0
FZD7	-0.111185	5.43204e-29	0
SCYL1	-0.111255	1.71526e-85	0
PLEKHO1	-0.111335	4.83143e-93	0
GABPB1-IT1	-0.111422	5.75569e-33	0
IPO11	-0.111592	2.57544e-39	0
KIAA2013	-0.111723	1.63165e-63	0
WASL	-0.111967	1.90376e-106	0
SAMHD1	-0.112114	1.49934e-29	0
NOA1	-0.112214	6.24786e-26	0
CCDC149	-0.112236	2.26894e-29	0
AC024610.2	-0.112346	3.1287e-39	0
COMMD9	-0.112375	6.56559e-56	0
STX4	-0.112566	5.36258e-43	0
VCAN	-0.112734	2.95724e-11	0
AAMP	-0.112756	4.46288e-59	0
KIFAP3	-0.112902	1.06035e-75	0
DNAJC13	-0.11293	2.51307e-82	0
MYBBP1A	-0.113071	1.92032e-62	0
MRPS11	-0.113231	5.26321e-55	0
JMJD6	-0.113329	2.84912e-42	0
RRAD	-0.113563	3.09883e-213	0
PYM1	-0.113758	1.34342e-40	0
CTBP1	-0.113927	4.86892e-145	0
NOP56	-0.114088	3.033e-48	0
CDC123	-0.114111	2.74197e-51	0
KPNB1	-0.114221	2.18846e-178	0
TINF2	-0.114235	4.64271e-17	0
ANAPC5	-0.114303	4.43516e-150	0
EIF4A3	-0.114417	1.14939e-22	0
BORCS7	-0.114739	4.14255e-88	0
CZIB	-0.114882	6.48568e-88	0
METAP1	-0.114889	2.50229e-40	0
PTCD2	-0.115296	1.97764e-24	0
HOOK3	-0.115328	1.1333e-145	0
MARCKS	-0.115921	3.82982e-32	0
GSTM4	-0.115975	3.51751e-79	0
AL132855.1	-0.115977	1.76555e-13	0
CXXC5	-0.116012	2.02744e-203	0
NRDC	-0.116063	0	0
GCC2	-0.116342	2.77301e-57	0
HDLBP	-0.116414	0	0
PAK1IP1	-0.116414	5.57366e-19	0
SERPINB1	-0.11657	2.3541e-26	0
CTCF	-0.116595	1.75027e-94	0
SLC39A1	-0.116618	1.76348e-15	0
EIF2S3	-0.116696	3.91675e-83	0
LBX1	-0.116943	3.64206e-33	0
KAT2B	-0.117192	8.49347e-136	0
AKT1S1	-0.117256	8.5397e-79	0
KAT14	-0.117339	2.21405e-38	0
SRM	-0.117801	3.13042e-114	0
CENPX	-0.1182	4.74264e-63	0
ABHD17A	-0.118285	2.80451e-107	0
TPD52L2	-0.118477	9.51704e-51	0
UROD	-0.119294	1.69348e-75	0
LMO1	-0.119506	2.3895e-69	0
MAFA	-0.119724	9.30895e-100	0
FP236383.3	-0.119747	3.92543e-236	0
GPAT3	-0.119935	5.18425e-114	0
RARS	-0.119938	9.03042e-38	0
DCXR	-0.119987	5.23392e-208	0
PEX1	-0.12029	4.61371e-45	0
MIOS	-0.120572	3.60466e-113	0
SRP68	-0.120668	2.27561e-66	0
ETS2	-0.120867	3.04798e-47	0
RAB2A	-0.120964	4.93237e-218	0
C1orf54	-0.121042	1.48779e-19	0
INTS12	-0.121049	1.90424e-27	0
AC005261.1	-0.121051	5.42455e-34	0
AKAP7	-0.12109	2.02855e-101	0
LSM14B	-0.121402	1.25051e-43	0
LRPAP1	-0.12151	1.38906e-104	0
TLN1	-0.121616	1.41698e-147	0
DRG1	-0.12163	2.43671e-121	0
PKP2	-0.121713	6.00197e-18	0
WDR47	-0.12195	2.87197e-57	0
MCM7	-0.122524	2.97607e-27	0
HNRNPR	-0.1227	1.38555e-116	0
C9orf72	-0.122794	1.19662e-26	0
ZDHHC2	-0.122869	8.88784e-62	0
ACYP1	-0.122885	1.87642e-57	0
GTF3C3	-0.122897	3.68232e-51	0
COIL	-0.122954	1.65123e-28	0
PSMB7	-0.122959	6.08215e-175	0
QARS	-0.123295	5.76343e-113	0
PGAM1	-0.123415	2.45201e-27	0
ECPAS	-0.123708	1.01205e-276	0
GSK3A	-0.123905	2.59265e-49	0
PRMT5	-0.124126	9.0244e-27	0
TMX3	-0.124192	5.30309e-34	0
TMEM30A	-0.124463	2.28757e-58	0
NAE1	-0.124541	8.8594e-54	0
PALM2-AKAP2	-0.124679	1.45463e-50	0
ZBTB44	-0.124826	1.3892e-209	0
RAB11FIP5	-0.125064	2.39334e-21	0
LRRC7	-0.125438	6.51487e-22	0
DDX50	-0.125459	5.31166e-60	0
SMTNL2	-0.125563	1.16521e-278	0
UBTF	-0.126065	1.94631e-106	0
DNAJB12	-0.12612	1.44432e-66	0
TPM1	-0.126914	0.0216742	0
C1orf43	-0.126938	2.6855e-228	0
RB1CC1	-0.127034	1.52165e-215	0
LYRM1	-0.127267	3.9147e-53	0
MOB1A	-0.127518	1.31625e-29	0
DIS3L	-0.127721	3.6728e-71	0
MTHFD2	-0.127737	1.86589e-46	0
GTF2F2	-0.127782	9.81322e-111	0
C8orf76	-0.127906	1.10776e-30	0
LINC01634	-0.127966	8.3438e-62	0
C19orf12	-0.127977	6.3209e-86	0
CREB3	-0.127995	2.12092e-21	0
USP22	-0.128326	8.15033e-180	0
ATP6V1B2	-0.128461	2.4691e-54	0
RAP1A	-0.128558	3.23612e-98	0
ADAL	-0.128637	1.50238e-35	0
TAB2	-0.128666	2.99434e-147	0
SYNPO2L	-0.128867	7.80916e-285	0
STT3A	-0.129119	6.3412e-27	0
TXNIP	-0.129254	8.5874e-271	0
ERCC2	-0.12979	1.20433e-16	0
ZYX	-0.13003	1.01276e-59	0
COPS5	-0.130085	2.69672e-182	0
GEMIN7	-0.130177	1.94613e-28	0
XBP1	-0.130231	1.23625e-26	0
KLHL28	-0.130255	3.43315e-40	0
CAB39L	-0.130257	3.14285e-24	0
NQO2	-0.130791	1.64515e-129	0
CCDC141	-0.130888	1.46529e-81	0
PEX2	-0.131077	3.3412e-73	0
TFDP1	-0.131093	3.2239e-64	0
PWWP3B	-0.13124	1.66503e-33	0
NRIP1	-0.131249	1.6204e-212	0
COQ4	-0.131367	2.40211e-52	0
DYRK2	-0.131375	7.48995e-100	0
WDR12	-0.131658	5.52865e-42	0
TSPAN3	-0.131675	7.76832e-221	0
UTP20	-0.13206	6.43127e-47	0
MCCC2	-0.132162	8.50759e-63	0
CNPY2	-0.132237	1.20472e-71	0
PDLIM5	-0.132238	2.53614e-80	0
TAF9B	-0.132381	3.22614e-14	0
SELENON	-0.13243	5.76504e-31	0
UBA1	-0.13246	3.49807e-138	0
TEX261	-0.132851	7.57793e-38	0
UCHL5	-0.1329	7.02338e-83	0
TUT7	-0.13325	9.42575e-64	0
LINC01854	-0.133533	2.01391e-61	0
AP002360.1	-0.133629	3.05617e-20	0
GABARAPL1	-0.133766	5.62311e-73	0
TEN1	-0.133899	7.82688e-14	0
MED29	-0.134511	2.21195e-61	0
TMBIM4	-0.134984	1.66014e-78	0
TMEM205	-0.135009	2.0147e-89	0
NUDT3	-0.135265	1.47614e-185	0
WDR74	-0.135389	4.35156e-38	0
NRBP1	-0.135658	1.35451e-102	0
ROGDI	-0.135769	1.24716e-61	0
PPP1R3B	-0.13609	1.9423e-197	0
SQOR	-0.136543	4.00591e-121	0
APC	-0.136625	1.46204e-124	0
SCAMP3	-0.136859	7.56361e-61	0
ZNF703	-0.137368	8.05973e-151	0
TATDN3	-0.137522	4.1302e-36	0
ATG4C	-0.137524	2.15333e-26	0
HNRNPUL2	-0.137536	5.74341e-96	0
VAMP4	-0.137581	3.6352e-30	0
SRF	-0.137657	2.97992e-93	0
MAF1	-0.137899	2.13045e-244	0
PLEKHA3	-0.137954	1.97008e-30	0
DRAM2	-0.138107	3.5354e-38	0
PRR13	-0.138259	6.96175e-33	0
RBBP5	-0.138326	8.98271e-30	0
MYL9	-0.13855	9.25774e-22	0
MAP2K1	-0.138835	5.22613e-84	0
FERMT2	-0.138934	1.33896e-124	0
LMNB2	-0.139176	1.44895e-95	0
SLC25A6	-0.139202	2.34091e-127	0
L2HGDH	-0.139874	5.67443e-61	0
SEPHS1	-0.140037	3.05765e-45	0
ERLIN2	-0.14012	1.22374e-28	0
EEF1G	-0.140316	2.79988e-113	0
DUSP27	-0.140478	1.60783e-212	0
MRPL48	-0.140482	6.34653e-86	0
MED8	-0.140541	1.27181e-22	0
FARSA	-0.140701	4.42983e-44	0
MCAM	-0.14084	8.01845e-12	0
CSNK2B	-0.140863	1.90385e-181	0
MSH2	-0.140966	2.23088e-32	0
USP46	-0.141071	2.13614e-49	0
XRN2	-0.141235	4.91039e-82	0
TMOD4	-0.141545	8.59267e-272	0
TMEM134	-0.141601	2.33746e-109	0
MRPL38	-0.142112	8.51865e-136	0
NFE2L1	-0.142334	0	0
MPP5	-0.142346	1.236e-115	0
LAPTM4B	-0.142404	1.26045e-194	0
MGST2	-0.142549	2.42218e-101	0
DBNL	-0.142586	4.49145e-77	0
TJP2	-0.142671	2.50402e-37	0
CSNK2A1	-0.142991	7.45841e-163	0
BET1L	-0.143149	1.706e-26	0
CIR1	-0.143165	1.68888e-67	0
HOMER3	-0.143262	1.14318e-127	0
BUB3	-0.143304	5.46731e-45	0
RAB9A	-0.143774	5.18184e-36	0
ABRAXAS2	-0.143789	1.34732e-33	0
TMOD3	-0.143905	9.64671e-91	0
RABGGTB	-0.144046	3.76284e-73	0
YY1	-0.144126	6.17037e-162	0
WDYHV1	-0.144383	2.08295e-14	0
AC002398.2	-0.144454	2.24439e-87	0
LIG4	-0.144486	4.87043e-19	0
CTSD	-0.144578	1.73117e-168	0
PYGM	-0.144665	1.75072e-51	0
DDX49	-0.144787	1.36538e-33	0
RPL7L1	-0.145017	1.63655e-89	0
VPS11	-0.145136	2.69655e-27	0
TNFRSF1A	-0.145169	1.87562e-65	0
ZNF33B	-0.145299	1.06914e-24	0
C6orf120	-0.145654	6.2336e-22	0
ADRB2	-0.145811	8.5481e-25	0
DUSP26	-0.145948	0	0
ABHD14B	-0.14599	2.24642e-18	0
TRUB2	-0.145997	2.87515e-26	0
PRXL2C	-0.146035	3.87443e-14	0
ARF1	-0.146199	1.94868e-181	0
GPN1	-0.146456	5.99195e-18	0
C6orf136	-0.146478	1.30621e-50	0
SAT2	-0.146638	2.28464e-139	0
WASHC4	-0.14677	2.1797e-95	0
NDUFA10	-0.147637	1.83922e-272	0
RRAS	-0.147778	1.55535e-29	0
ZNF576	-0.147813	3.42782e-19	0
EXOC3	-0.147842	9.68401e-102	0
PPP3CB	-0.148067	0	0
RNF103	-0.148265	2.29828e-46	0
BTG2	-0.148686	3.89822e-66	0
PHC1	-0.148767	4.76239e-23	0
RBM17	-0.148955	1.46355e-160	0
RRAGD	-0.149186	5.39677e-266	0
POLR2H	-0.149364	3.4405e-34	0
NOP14	-0.149376	2.10801e-59	0
ZNF778	-0.149398	5.71083e-17	0
BRAP	-0.149569	1.85311e-55	0
WASHC5	-0.149574	1.07215e-35	0
WBP4	-0.149689	3.74445e-129	0
TM9SF3	-0.14979	4.91437e-103	0
RNF126	-0.149868	1.24326e-64	0
DNPH1	-0.14987	2.14906e-139	0
B4GALT3	-0.14989	6.84812e-20	0
RCAN1	-0.150204	1.36843e-31	0
SLC25A5	-0.150685	2.88327e-19	0
RUVBL2	-0.150718	6.92001e-61	0
EEF2	-0.150799	1.7492e-262	0
TMBIM1	-0.150928	2.66253e-103	0
TSG101	-0.150984	4.40755e-94	0
FP236383.4	-0.151082	4.94121e-38	0
SHOC2	-0.151277	4.4077e-83	0
LMCD1	-0.15167	8.44292e-269	0
SMAD5	-0.151816	1.13371e-94	0
BFAR	-0.151916	4.7728e-57	0
FOXN2	-0.152049	7.11617e-39	0
FLNC	-0.152103	4.60624e-156	0
ACOX1	-0.152306	9.64596e-98	0
NDFIP1	-0.152347	5.89385e-125	0
VGLL2	-0.152625	1.69348e-99	0
AL135905.2	-0.152954	3.67204e-55	0
ZNF394	-0.153244	3.29859e-22	0
TEX10	-0.153365	3.40705e-25	0
BIN1	-0.153397	1.50977e-266	0
SURF6	-0.153422	2.39913e-46	0
ARL6IP1	-0.153476	6.62336e-28	0
CLIP4	-0.153537	7.17904e-143	0
HDDC3	-0.153701	1.21915e-17	0
HEBP1	-0.153848	3.39084e-36	0
NNT-AS1	-0.153935	6.66335e-166	0
WDR82	-0.154197	2.34257e-107	0
CCSER2	-0.154256	5.55103e-236	0
PDZD8	-0.15426	3.4544e-53	0
TRMT5	-0.154314	2.38917e-13	0
PRRC1	-0.154371	4.41393e-23	0
PACSIN3	-0.154386	7.38563e-258	0
RAB5B	-0.154539	2.91667e-100	0
DERL1	-0.154567	6.84375e-51	0
TLE1	-0.154655	1.21732e-162	0
MRPL49	-0.154709	2.20364e-12	0
TRIB1	-0.15474	1.96348e-87	0
MASP1	-0.154818	6.20497e-25	0
NIT1	-0.155178	9.02211e-37	0
CTDSP1	-0.155305	2.00581e-65	0
DDX3Y	-0.155464	4.99612e-52	0
HIBADH	-0.155501	6.66721e-158	0
SOCS6	-0.155706	1.01491e-62	0
ZDHHC5	-0.155838	1.70013e-58	0
LRRC2	-0.156147	1.7531e-300	0
BPNT1	-0.156448	7.5539e-19	0
EXOSC9	-0.156975	1.3936e-21	0
KLF5	-0.156979	2.37071e-12	0
HLA-E	-0.157157	1.94255e-36	0
OSER1-DT	-0.157447	3.23503e-29	0
PDCD2L	-0.157495	1.02998e-22	0
SH3KBP1	-0.157778	7.98012e-26	0
CCDC85B	-0.157811	3.83773e-191	0
CEBPZOS	-0.157898	3.37579e-86	0
CUEDC2	-0.157927	5.95302e-126	0
FBXW5	-0.157928	3.22952e-213	0
WDR62	-0.158027	6.07465e-70	0
PRKAR2A	-0.158302	1.4426e-255	0
TMOD1	-0.158321	0	0
ATP6V1D	-0.15867	7.66143e-54	0
ATG2B	-0.15868	4.24793e-73	0
LANCL1	-0.158958	1.19175e-68	0
MAPKAPK2	-0.159335	2.96779e-188	0
EIF2B1	-0.159719	1.19742e-45	0
SIRT2	-0.159744	1.78036e-235	0
ATF1	-0.160071	3.889e-87	0
FAM177A1	-0.160911	1.02936e-55	0
ATG4A	-0.161192	4.23692e-31	0
ARPC4	-0.161284	7.22462e-45	0
AC092164.1	-0.161611	5.0452e-20	0
FAM50A	-0.161965	4.22455e-128	0
RABEP1	-0.161987	5.94233e-233	0
API5	-0.162114	4.19137e-70	0
TMEM33	-0.16212	4.03512e-37	0
LINC02035	-0.162216	4.14131e-34	0
HSPB7	-0.162358	0	0
YPEL3	-0.162425	3.01564e-171	0
HSD11B1-AS1	-0.162426	1.71698e-21	0
NMRK2	-0.162441	0	0
AFF1	-0.162669	2.67236e-287	0
NAB1	-0.162821	8.69616e-23	0
RTF2	-0.162829	4.77436e-117	0
LERFS	-0.162976	2.04668e-17	0
PPP4R2	-0.162994	3.49168e-147	0
VPS35	-0.163023	5.98383e-82	0
DNAJC7	-0.163049	1.87851e-147	0
TARDBP	-0.163233	8.35568e-148	0
TM9SF2	-0.163451	1.38398e-68	0
TFIP11	-0.163948	5.87355e-39	0
ZKSCAN2	-0.164148	1.94416e-15	0
ZNF358	-0.164353	5.81243e-165	0
CCDC106	-0.164503	3.71706e-29	0
FBXO25	-0.164794	1.00051e-51	0
TTC4	-0.164865	1.66509e-51	0
SPG21	-0.164865	9.0812e-43	0
NUP54	-0.164954	5.38816e-55	0
BVES	-0.164973	2.52435e-113	0
TRAPPC11	-0.165038	1.03506e-75	0
BNIP3L	-0.165556	1.07031e-57	0
SUPV3L1	-0.165662	2.79897e-61	0
BBS7	-0.165833	3.73507e-18	0
TSSC4	-0.165926	7.38297e-72	0
MIEF1	-0.166318	6.15648e-23	0
PGPEP1L	-0.166584	1.79737e-63	0
BAG2	-0.166808	1.0919e-59	0
PRKAG1	-0.166953	1.96864e-87	0
SKA2	-0.167021	2.63718e-23	0
TSPAN8	-0.167163	1.49379e-77	0
SCYL2	-0.167251	1.43272e-46	0
CTDNEP1	-0.167264	8.45325e-262	0
YTHDF1	-0.167388	1.46322e-81	0
AMD1	-0.167625	9.20553e-51	0
SHISA4	-0.167798	0	0
PCMTD1	-0.168312	1.09163e-265	0
SERP1	-0.168374	1.21732e-75	0
MYL5	-0.168496	3.0297e-38	0
PSMD14	-0.168561	1.66898e-90	0
DNPEP	-0.168717	7.93868e-63	0
AMMECR1	-0.168992	1.5734e-25	0
CPEB2	-0.16913	3.67493e-35	0
RBBP4	-0.169145	8.85839e-107	0
RRN3	-0.169203	1.65926e-46	0
RAVER2	-0.169252	6.48047e-99	0
EIF4EBP1	-0.169335	4.74534e-100	0
MMAB	-0.170036	1.69575e-70	0
ALYREF	-0.170114	4.67746e-39	0
SLC1A4	-0.17032	5.02614e-109	0
MLF1	-0.170427	1.58825e-151	0
SNAPC3	-0.17044	6.34391e-66	0
[truncated: 78,988 more rows]

## Sheet: Sup.Table3
gene	avg_log2FC	p_val_adj	cluster
DSCAM	2.42397	5.82579e-20	Cells
ABCB1	2.35896	3.86544e-48	Cells
RASGEF1B	2.35067	3.81862e-156	Cells
SLC26A3	2.17063	2.05593e-80	Cells
CSMD1	1.82119	3.38465e-116	Cells
INO80D	1.35588	1.38758e-34	Cells
TTLL3	1.01562	1	Cells
MTRNR2L12	0.994358	0	Cells
AC008443.4	0.983291	1	Cells
BCOR	0.866291	1	Cells
RGN	0.846049	1	Cells
LPP	0.738645	8.31632e-11	Cells
AC105052.4	0.738346	1	Cells
CCDC84	0.728883	1	Cells
DLC1	0.604373	1	Cells
MTRNR2L8	0.546146	1.7758e-06	Cells
MYH7B	0.523726	1	Cells
MALAT1	0.517207	1.50305e-173	Cells
SRRM2	0.51268	7.79676e-07	Cells
AL138963.4	0.484933	1.84529e-07	Cells
LAMA2	0.477894	1	Cells
HMCN2	0.476237	1	Cells
GSE1	0.459775	1	Cells
RUNX1	0.456888	1	Cells
NEAT1	0.454949	4.30664e-29	Cells
FP236383.3	0.441161	1	Cells
EXOSC10	0.438085	1	Cells
AC011287.1	0.437191	1	Cells
MIRLET7BHG	0.432842	1	Cells
PDE4D	0.424026	0.712874	Cells
AR	0.411447	1	Cells
PCDH9	0.406757	1	Cells
AGBL1	0.406466	1	Cells
ZMIZ2	0.401321	1	Cells
ABCA8	0.396974	1	Cells
NOS1	0.389823	1	Cells
ABLIM2	0.387689	1	Cells
SLC35F1	0.386795	1	Cells
DPF3	0.385866	1	Cells
EGFR	0.385756	1	Cells
KLHL29	0.383674	1	Cells
SMOC2	0.380871	1	Cells
AUTS2	0.380008	1	Cells
RORA	0.374258	1	Cells
CADM2	0.373197	1	Cells
PDZD2	0.371421	1	Cells
PFKFB3	0.3668	0.0434973	Cells
PECAM1	0.36559	1	Cells
UNC13C	0.364348	1	Cells
NEGR1	0.362746	1	Cells
PLXDC2	0.359819	1	Cells
TOM1L2	0.358065	1	Cells
LINC01151	0.357936	0.115411	Cells
ESRRG	0.354017	1	Cells
CARNS1	0.352295	1	Cells
AC008014.1	0.349158	0.314852	Cells
NACC2	0.348549	1	Cells
FOXO1	0.347594	1	Cells
FILIP1L	0.347432	1	Cells
IGFN1	0.347383	1	Cells
RC3H1	0.347247	1	Cells
ELMO1	0.346716	1	Cells
LINC01091	0.346573	1	Cells
TMTC1	0.345299	1	Cells
DOCK9	0.344406	1	Cells
PKD1	0.342928	1	Cells
ABCA9	0.339691	1	Cells
KCNMA1	0.339156	1	Cells
PACSIN2	0.338376	1	Cells
MACROD2	0.337589	1	Cells
STARD13	0.337109	1	Cells
CD2BP2	0.336353	1	Cells
ZCCHC7	0.33571	1	Cells
NOTCH3	0.335509	1	Cells
GRAMD4	0.335297	1	Cells
LRP5	0.335105	1	Cells
NEO1	0.333322	1	Cells
RAPGEF1	0.330847	1	Cells
TMLHE	0.329675	1	Cells
MBNL1	0.327624	1	Cells
AC073475.1	0.327061	1	Cells
GLG1	0.326465	1	Cells
TNIK	0.324241	1	Cells
VWA8	0.320718	1	Cells
HSPG2	0.319277	0.00579076	Cells
LDLRAD4	0.318719	1	Cells
LRRC3B	0.318041	1	Cells
DMD	0.316648	0.836689	Cells
IL1RAPL1	0.315913	1	Cells
COL6A3	0.314177	1	Cells
WWOX	0.313418	0.230968	Cells
C15orf41	0.31162	1	Cells
APOD	0.31129	0.965744	Cells
TMEM94	0.31088	1	Cells
MITF	0.310351	1	Cells
GHR	0.308643	1	Cells
EBF1	0.308209	1	Cells
BBS9	0.307764	1	Cells
NFIA	0.307628	1	Cells
COL6A2	0.307317	1	Cells
YPEL2	0.306734	1	Cells
ST3GAL1	0.306413	1	Cells
PTPN14	0.304286	1	Cells
DAAM2	0.303946	1	Cells
PLCB4	0.303693	1	Cells
KCND3	0.301778	0.181659	Cells
TCF4	0.301409	1	Cells
OXNAD1	0.300843	1	Cells
AC107223.1	0.300589	1	Cells
CENPP	0.299097	1	Cells
PFKFB1	0.299016	1	Cells
ULK1	0.297693	1	Cells
RCAN2	0.297563	1	Cells
DIDO1	0.297546	1	Cells
MAPRE2	0.296504	1	Cells
CHSY3	0.292808	1	Cells
RYR3	0.292351	0.263179	Cells
FHIT	0.2921	1	Cells
ABCA10	0.291987	1	Cells
ANKRD17	0.291657	1	Cells
CASZ1	0.291155	0.387575	Cells
SOX13	0.291129	1	Cells
MAU2	0.290974	1	Cells
FHOD3	0.290822	1	Cells
MET	0.289631	1	Cells
ZHX3	0.28928	1	Cells
KALRN	0.289099	1	Cells
KDM6A	0.289064	1	Cells
NEDD4L	0.288664	1	Cells
PALLD	0.287764	1	Cells
SORCS2	0.286143	1	Cells
LARGE1	0.286096	1	Cells
S100A10	0.286056	1	Cells
SUN1	0.285967	1	Cells
ARHGAP6	0.285859	1	Cells
GAB1	0.285822	1	Cells
SLC8A3	0.28574	1	Cells
TSC22D1	0.285176	1	Cells
ATP2B2	0.28514	1	Cells
KCNN2	0.285134	1	Cells
MAST2	0.284916	1	Cells
USP34	0.283913	1	Cells
ZNF423	0.283751	1	Cells
BBX	0.282904	1	Cells
COBLL1	0.282678	1	Cells
DEPTOR	0.282614	1	Cells
CHD2	0.282508	1	Cells
NCOR2	0.282351	1	Cells
ANGPT1	0.281882	1	Cells
GDNF	0.281477	1	Cells
SLC24A3	0.28141	0.61927	Cells
GPC1	0.281375	1	Cells
UBAP2L	0.281021	1	Cells
TPRG1	0.280334	1	Cells
SCRIB	0.279593	1	Cells
AC007563.2	0.279296	0.290307	Cells
EIF4G3	0.277924	1	Cells
DIAPH1	0.277864	1	Cells
PDZRN3	0.277845	0.247853	Cells
SLC29A2	0.275719	1	Cells
STIM1	0.275596	1	Cells
DLGAP4	0.274915	1	Cells
MIR1-1HG	0.274349	0.248402	Cells
RGS12	0.274274	1	Cells
PLCL2	0.274224	1	Cells
CTBP2	0.273757	1	Cells
SNTB1	0.273416	1	Cells
OBSL1	0.273384	1	Cells
SMARCA1	0.27133	1	Cells
CHM	0.271061	1	Cells
SYPL2	0.270099	1	Cells
ALPK3	0.26943	1	Cells
EEF2K	0.268773	1	Cells
CYHR1	0.268739	1	Cells
LANCL1-AS1	0.267298	1	Cells
ZFHX3	0.267212	1	Cells
OSBPL6	0.267184	1	Cells
GPC4	0.267058	1	Cells
SMARCC2	0.266618	1	Cells
CKMT2-AS1	0.266283	1	Cells
GBA2	0.265802	1	Cells
SLC26A6	0.265592	1	Cells
STAG2	0.26413	1	Cells
ACACB	0.26376	1	Cells
PDS5A	0.263025	1	Cells
TTC7B	0.262342	1	Cells
POLE	0.261431	1	Cells
GALNT2	0.261005	1	Cells
DGKD	0.260704	1	Cells
SPTBN1	0.260566	0.687396	Cells
AKT2	0.260421	1	Cells
DOCK4	0.259979	1	Cells
RBM20	0.259669	1	Cells
SRSF9	0.259275	1	Cells
LRRFIP2	0.259141	1	Cells
MYLK4	0.259034	0.00952939	Cells
FBRSL1	0.258985	1	Cells
DYSF	0.258528	1	Cells
SLC37A4	0.2584	1	Cells
NUP98	0.25826	1	Cells
HDAC5	0.256988	1	Cells
CAMK2D	0.256287	1	Cells
ARHGAP29	0.255883	1	Cells
TULP4	0.255503	1	Cells
TOB2	0.255257	1	Cells
EEPD1	0.255133	1	Cells
CRIM1	0.255049	1	Cells
ARID1A	0.254423	1	Cells
SMARCB1	0.254113	1	Cells
ACVR1	0.253498	1	Cells
SLC7A2	0.252953	1	Cells
SSH2	0.252946	1	Cells
EP400	0.252756	1	Cells
DNMT3A	0.252742	1	Cells
TACC2	0.252733	1	Cells
PLEKHM2	0.2517	1	Cells
HIRIP3	0.251117	1	Cells
MYH9	0.250487	1	Cells
SPG7	0.249847	1	Cells
PTPRB	0.249793	1	Cells
GADD45G	0.249553	1	Cells
ZBTB7C	0.249297	1	Cells
NFYC	0.248687	1	Cells
LSM12	0.248351	1	Cells
GADL1	0.247955	1	Cells
VOPP1	0.247942	1	Cells
LUC7L2	0.247139	1	Cells
DGKZ	0.246959	1	Cells
TIMP3	0.246929	1	Cells
SGMS1	0.246772	1	Cells
ATE1	0.246713	1	Cells
SFPQ	0.246698	1	Cells
AGTPBP1	0.245933	1	Cells
CEP350	0.24586	1	Cells
LRRTM4	0.245517	0.000211419	Cells
PRKCQ	0.245108	0.903778	Cells
USP6	0.245099	1	Cells
PPP2R3B	0.244712	1	Cells
RASSF3	0.244689	1	Cells
FRMD3	0.244601	1	Cells
NFATC2	0.24352	1	Cells
LINC02119	0.243442	0.0959714	Cells
BICC1	0.243346	0.00157735	Cells
SON	0.243114	1	Cells
LRRFIP1	0.242432	1	Cells
CSNK1E	0.241909	1	Cells
ANKH	0.24124	1	Cells
FGGY	0.241166	1	Cells
MGLL	0.240919	1	Cells
AC005323.1	0.240555	1	Cells
SGCG	0.23975	1	Cells
LGR5	0.239629	1	Cells
XPO4	0.239574	1	Cells
SEPTIN9	0.239503	1	Cells
BACH1	0.238379	1	Cells
CEP85	0.238316	1	Cells
MTSS2	0.238286	1	Cells
AHDC1	0.23708	1	Cells
TRPC4AP	0.23688	1	Cells
FAM214A	0.236579	1	Cells
TASOR2	0.235605	1	Cells
JAK2	0.235565	1	Cells
MYADML2	0.235449	1	Cells
ACSS2	0.23513	1	Cells
EIF2D	0.234587	0.641365	Cells
WBP1L	0.234529	1	Cells
LRP6	0.234288	1	Cells
TBC1D4	0.233154	1	Cells
IRF2	0.233141	1	Cells
COPA	0.232705	1	Cells
PERM1	0.232582	0.163418	Cells
ARHGEF7	0.231185	1	Cells
OSGEP	0.231108	1	Cells
FOXK1	0.231103	1	Cells
MIB2	0.230607	1	Cells
EPS15	0.230006	1	Cells
LCOR	0.229791	1	Cells
MBP	0.229667	1	Cells
PCBP4	0.229299	1	Cells
STAT3	0.229258	1	Cells
SOX5	0.228989	1	Cells
SKI	0.228683	1	Cells
AKT3	0.228682	1	Cells
CASTOR2	0.228338	1	Cells
FP671120.4	0.227913	0.484727	Cells
CUEDC1	0.227804	1	Cells
ANKRD28	0.227193	1	Cells
DTNA	0.226462	0.541725	Cells
YAP1	0.225768	1	Cells
ZNF385D	0.225699	1	Cells
H6PD	0.224879	1	Cells
FBXL17	0.22457	0.59734	Cells
AL450998.2	0.224461	1	Cells
CLTCL1	0.224312	1	Cells
PPFIA1	0.224091	1	Cells
CNTFR	0.223875	1	Cells
HIVEP2	0.223866	0.395139	Cells
KAZN	0.22383	1	Cells
VPS13A	0.223627	1	Cells
TRIM72	0.223403	1	Cells
PEBP4	0.223219	0.00174732	Cells
FAM241A	0.222839	1	Cells
PTPA	0.222204	1	Cells
C1orf21	0.221785	1	Cells
CAMK2B	0.221214	0.0845182	Cells
RASAL2	0.220679	1	Cells
ZEB1	0.220205	1	Cells
ADGRA3	0.219368	1	Cells
NCAM1	0.219206	1	Cells
VPS13D	0.218619	1	Cells
CLTC	0.218265	1	Cells
LMO7	0.217759	1	Cells
EPS15L1	0.217525	1	Cells
SPEG	0.21742	1	Cells
ABCC9	0.217241	1	Cells
UBE2H	0.216884	1	Cells
BRD2	0.216501	1	Cells
DCTN4	0.216337	1	Cells
TNS2	0.216226	1	Cells
AFF4	0.216088	1	Cells
KCNJ11	0.216086	1	Cells
PTGDS	0.216028	1	Cells
STAT5B	0.21522	1	Cells
COL15A1	0.215211	5.3634e-07	Cells
ITGA7	0.215078	0.495946	Cells
MAPT	0.214918	1	Cells
DECR2	0.214436	1	Cells
PDE8A	0.214208	1	Cells
PPP3R1	0.214199	1	Cells
MACF1	0.214191	1	Cells
AKAP6	0.214127	0.914956	Cells
NPEPPS	0.213709	1	Cells
CLOCK	0.213336	1	Cells
EGFLAM	0.213327	1	Cells
DDI2	0.212955	1	Cells
RAD9A	0.212557	1	Cells
FNDC3B	0.211291	1	Cells
ARHGEF10L	0.210169	1	Cells
DOP1B	0.209847	1	Cells
SAE1	0.20975	1	Cells
DDX46	0.208611	1	Cells
TOMM40	0.207471	1	Cells
CDC37	0.206958	1	Cells
FBLN2	0.206687	1	Cells
PLCB1	0.20662	1	Cells
FLRT2	0.206268	1	Cells
KATNAL1	0.205432	1	Cells
DIP2C	0.205399	0.375762	Cells
STAU2	0.20531	1	Cells
JPH2	0.205249	0.0111775	Cells
CEP85L	0.204998	1	Cells
DLST	0.204684	1	Cells
DPYSL3	0.204124	1	Cells
BRD4	0.203934	1	Cells
TERF2	0.203485	1	Cells
SCN4A	0.203205	1	Cells
ACTB	0.20311	1	Cells
AL670729.3	0.202782	1	Cells
ASH1L	0.201851	1	Cells
JAG2	0.201781	1	Cells
PCBP1-AS1	0.201632	1	Cells
BAZ1B	0.201428	1	Cells
PGM5	0.201347	1	Cells
RNF168	0.200433	1	Cells
CCDC50	0.200409	1	Cells
AP3D1	0.200292	1	Cells
MAP3K4	0.199963	1	Cells
CACNA1S	0.199006	1	Cells
SNAP47	0.198785	1	Cells
TRAK1	0.198713	1	Cells
NKAIN3	0.198709	1	Cells
SYNE1	0.198429	1	Cells
MYOM3	0.198055	0.000665438	Cells
DYM	0.19791	1	Cells
PPP4R3B	0.197863	1	Cells
SORBS1	0.197722	0.00107401	Cells
PROB1	0.197003	1	Cells
SLC12A2	0.196642	1	Cells
TTYH2	0.195722	1	Cells
GMPR	0.195121	1	Cells
THRAP3	0.194906	1	Cells
JAK1	0.194833	0.556586	Cells
PLA2G4C	0.194704	1	Cells
GNAL	0.194571	1	Cells
PRSS45P	0.19442	1	Cells
SMAD4	0.19397	1	Cells
ILRUN	0.193739	1	Cells
DYNC1I2	0.193516	1	Cells
CCDC69	0.192734	1	Cells
SYNE2	0.192396	1	Cells
TP53BP1	0.192007	1	Cells
ZNF516	0.191667	1	Cells
GSN	0.191587	1.57572e-06	Cells
ADGRF5	0.191504	1	Cells
SEC31A	0.190709	1	Cells
SPTB	0.190297	0.0357793	Cells
XPNPEP3	0.190284	1	Cells
LMOD1	0.190215	0.000519512	Cells
ATP2B4	0.189857	1	Cells
CREBBP	0.189374	1	Cells
ART3	0.189278	1	Cells
MYO18A	0.188824	0.0749277	Cells
SLC44A2	0.188668	1	Cells
EPM2A	0.188473	1	Cells
TMEM38B	0.188426	1	Cells
FAM20B	0.187967	1	Cells
DENR	0.187183	1	Cells
UBQLN1	0.187113	1	Cells
ANKRD2	0.186763	1	Cells
DNAJC13	0.186606	1	Cells
NFIC	0.186514	1	Cells
SQSTM1	0.186354	1	Cells
DDX6	0.186203	1	Cells
PAM	0.186101	0.0134107	Cells
STRN	0.185694	1	Cells
AC090403.1	0.185024	0.133079	Cells
TSC22D3	0.184842	1	Cells
ALDOA	0.184803	1.05605e-05	Cells
LRRC20	0.18357	1	Cells
COL28A1	0.183376	1	Cells
FN1	0.183231	0.024657	Cells
SRSF4	0.182388	1	Cells
PPP1R12B	0.18214	0.0601237	Cells
MAPKAPK3	0.182081	1	Cells
UBE3C	0.18192	1	Cells
IFNGR2	0.181884	1	Cells
BRD7	0.181862	0.59566	Cells
PLIN4	0.181444	0.00177883	Cells
BTG1	0.181139	1	Cells
MTUS1	0.180929	1	Cells
SLIT3	0.18055	1	Cells
NRIP1	0.180178	0.358548	Cells
FBN1	0.180122	0.134733	Cells
CDC42EP3	0.180051	1	Cells
PAFAH1B1	0.179927	1	Cells
AMOTL1	0.179725	1	Cells
CD36	0.179313	1	Cells
TLN2	0.179279	0.0333152	Cells
CHP1	0.179238	1	Cells
RGMA	0.178532	0.195912	Cells
NPLOC4	0.178503	1	Cells
RAB3GAP1	0.178297	1	Cells
JDP2	0.178125	1	Cells
BNC2	0.178066	0.0222277	Cells
HDGFL2	0.177671	0.713051	Cells
LDB2	0.17764	1	Cells
CHD7	0.1776	1	Cells
SPOP	0.177228	1	Cells
NLN	0.176928	1	Cells
ANKRD39	0.176606	1	Cells
PITHD1	0.176594	1	Cells
KMT2D	0.176593	0.141096	Cells
NCOR1	0.176411	1	Cells
AHCYL1	0.176312	1	Cells
PRDM2	0.176296	1	Cells
DGLUCY	0.176109	1	Cells
RSU1	0.175515	1	Cells
NEMF	0.175455	1	Cells
EXT2	0.175287	1	Cells
DHRS3	0.175126	1	Cells
ESRRA	0.17474	1	Cells
ZMYM2	0.174607	1	Cells
RBIS	0.174565	1	Cells
ARHGAP35	0.174491	1	Cells
PALM2-AKAP2	0.174456	1	Cells
ANK2	0.174027	1	Cells
RGMB	0.173975	1	Cells
TSPO	0.173657	1	Cells
FAM193B	0.173626	1	Cells
EXOC6	0.173473	1	Cells
ROBO1	0.173336	0.0973468	Cells
KPNA6	0.173079	1	Cells
ATXN7L3B	0.172993	1	Cells
GTF2I	0.172517	1	Cells
PPP2R2A	0.172117	1	Cells
FAM184B	0.171924	1	Cells
WIPI1	0.171648	1	Cells
ANO5	0.171438	0.0703425	Cells
MLXIP	0.171433	1	Cells
BTBD7	0.171191	1	Cells
VPS13C	0.170957	1	Cells
CLASP2	0.170931	1	Cells
CFD	0.170814	5.03301e-06	Cells
ATP2B1	0.169797	1	Cells
SCAF8	0.169091	1	Cells
GPATCH2L	0.16909	1	Cells
NBAS	0.16898	1	Cells
DOK5	0.168977	1	Cells
TEAD1	0.168838	0.373035	Cells
TCEA1	0.168736	0.0983102	Cells
PSME1	0.168515	1	Cells
DNAJB2	0.168499	1	Cells
LANCL2	0.168305	1	Cells
BCL2	0.168238	0.0357201	Cells
DOCK3	0.168128	1	Cells
TARDBP	0.167945	1	Cells
ANOS1	0.167272	1	Cells
DCAF5	0.167156	0.859828	Cells
SH3RF3	0.167017	1	Cells
YTHDF3	0.166619	1	Cells
FSD2	0.166187	1	Cells
SH3PXD2A	0.165816	1	Cells
EML1	0.165598	1	Cells
SLC1A4	0.165498	0.191267	Cells
UBE3A	0.165233	1	Cells
VPS4A	0.165218	0.820791	Cells
MCL1	0.165168	1	Cells
COMT	0.165065	1	Cells
TXNRD2	0.165001	1	Cells
PTP4A3	0.164774	1	Cells
LONP2	0.164292	1	Cells
MT-CYB	0.164249	5.65088e-51	Cells
H1FX	0.164138	1	Cells
TERF2IP	0.16408	1	Cells
VWF	0.164071	0.00667836	Cells
MAOB	0.163813	0.427197	Cells
NAV3	0.163392	0.157981	Cells
CRKL	0.16312	1	Cells
YTHDF2	0.162894	1	Cells
SPSB3	0.162892	1	Cells
NGLY1	0.162842	1	Cells
PRR16	0.162795	1	Cells
PER1	0.162687	1	Cells
RAB1A	0.162605	1	Cells
WBP4	0.162428	1	Cells
ZBTB43	0.162407	1	Cells
MYH11	0.161989	1	Cells
H1F0	0.161313	1	Cells
FOXN3	0.161242	2.85545e-07	Cells
ANK3	0.161223	0.000404768	Cells
COL3A1	0.161212	1	Cells
TMED5	0.161183	1	Cells
FBXO34	0.160649	0.267641	Cells
KCNJ12	0.160594	0.00472448	Cells
DNAJC15	0.16056	1	Cells
CDC27	0.159709	1	Cells
TMEM65	0.159384	1	Cells
TTC33	0.158723	1	Cells
STEAP3	0.158111	1	Cells
STX8	0.158053	1	Cells
GFOD1	0.157905	1	Cells
SAMD4A	0.157776	0.019529	Cells
NXN	0.157587	0.0320859	Cells
SMAP1	0.157388	1	Cells
NFIB	0.157321	1	Cells
HNRNPD	0.157199	1	Cells
TRIM63	0.156767	1	Cells
TMEM185A	0.156631	1	Cells
ZER1	0.156554	1	Cells
H19	0.156317	0.0540919	Cells
CAP2	0.15629	1	Cells
SIRT3	0.156116	1	Cells
MPRIP	0.156107	0.149984	Cells
SCN7A	0.155635	1	Cells
VAPB	0.155622	0.579479	Cells
ASB15	0.155547	1	Cells
IL6ST	0.155545	1	Cells
BTBD2	0.155371	1	Cells
RNF10	0.155309	0.789477	Cells
GALNT1	0.154964	1	Cells
MEF2D	0.154447	0.162709	Cells
AMPD1	0.154443	1	Cells
CDC42BPA	0.154242	1	Cells
ZDHHC2	0.154115	1	Cells
WAC	0.153905	1	Cells
MAPKAPK2	0.153764	0.112227	Cells
TPP2	0.153674	1	Cells
MGMT	0.153557	1	Cells
PPP2R5C	0.153227	1	Cells
CPSF2	0.153127	1	Cells
CDH15	0.15304	1	Cells
NAA15	0.152852	1	Cells
CAPN2	0.152697	1	Cells
GIGYF2	0.15207	1	Cells
TRIP10	0.151695	1	Cells
POLR2A	0.151524	1	Cells
RAB18	0.151487	1	Cells
TRA2B	0.151056	1	Cells
GPAT4	0.151024	1	Cells
AL139383.1	0.151024	1	Cells
DGAT1	0.150991	1	Cells
AKT1S1	0.150954	1	Cells
MZT2A	0.150371	1	Cells
DST	0.150227	1	Cells
SLMAP	0.150063	1	Cells
SUN2	0.149878	1	Cells
GARS	0.149821	1	Cells
PSME4	0.149758	1	Cells
MACROD1	0.149429	1	Cells
WDR33	0.149161	1	Cells
ACYP2	0.149121	0.887816	Cells
PHF20L1	0.148525	1	Cells
DHRS7B	0.148489	1	Cells
P2RX6	0.148272	1	Cells
INPPL1	0.148203	1	Cells
USP53	0.148178	1	Cells
SEC11A	0.14761	0.588728	Cells
RAB7A	0.147515	1	Cells
ERI3	0.147149	1	Cells
INPP5A	0.147125	0.918898	Cells
PLPP7	0.146992	1	Cells
NPEPL1	0.146866	1	Cells
APP	0.146545	1	Cells
MRPL38	0.146182	1	Cells
SRSF10	0.146148	1	Cells
FBXW4	0.146117	1	Cells
VCL	0.146094	1	Cells
HNRNPDL	0.145934	1	Cells
PLEKHO1	0.145703	1	Cells
TTC3	0.145602	0.0544111	Cells
PHIP	0.145281	1	Cells
FRY	0.145234	1	Cells
PURA	0.145152	1	Cells
RARB	0.144687	1	Cells
DHFR	0.14461	1	Cells
PPP2R3A	0.144575	0.000304219	Cells
OPLAH	0.144557	1	Cells
ATXN10	0.144515	1	Cells
OXSR1	0.144406	1	Cells
SCNM1	0.144232	1	Cells
TMED10	0.144078	1	Cells
USP48	0.144077	1	Cells
KBTBD12	0.143992	1	Cells
SERPINB6	0.143842	1	Cells
LPGAT1	0.143617	1	Cells
TRIR	0.14356	1	Cells
SURF4	0.143457	1	Cells
HBP1	0.143164	1	Cells
ALDH1L1	0.14268	0.0383472	Cells
SNHG14	0.142594	3.32282e-08	Cells
PIGS	0.142277	1	Cells
TCERG1	0.142204	1	Cells
RPA1	0.142145	1	Cells
GOSR2	0.142036	1	Cells
CHCHD3	0.14183	0.130642	Cells
LINC00346	0.141587	1	Cells
VCPIP1	0.141435	1	Cells
DNAJC4	0.141428	1	Cells
TMEM233	0.14097	0.552505	Cells
SF1	0.140486	1	Cells
RILPL1	0.140437	1	Cells
TNXB	0.140433	2.25408e-06	Cells
RIC1	0.140303	1	Cells
LIFR	0.139963	1	Cells
HIBADH	0.139776	1	Cells
WTAP	0.139741	1	Cells
PPP3CA	0.139468	0.17392	Cells
ANKRD10	0.139306	1	Cells
EFR3A	0.138876	1	Cells
STAMBP	0.138855	1	Cells
PTPN3	0.138417	1	Cells
GNA12	0.13837	1	Cells
NHLRC2	0.138276	1	Cells
YTHDF1	0.138129	1	Cells
ESYT1	0.138042	1	Cells
DHX36	0.137858	1	Cells
CPTP	0.136983	1	Cells
RCOR3	0.136223	1	Cells
PXN	0.136012	0.0537664	Cells
PRRX1	0.135249	1	Cells
RAPGEF2	0.135097	1	Cells
ZCCHC24	0.134953	0.00711109	Cells
DMAC2	0.134915	1	Cells
WDR41	0.134762	1	Cells
MXRA7	0.134407	1	Cells
FLT1	0.134348	1	Cells
PIK3CB	0.134068	1	Cells
MTX2	0.134058	1	Cells
PAK1	0.133932	1	Cells
RBM8A	0.133914	1	Cells
USP46	0.133814	1	Cells
NR1D2	0.133523	0.0146274	Cells
SYNPO	0.133441	0.0428626	Cells
S100A6	0.133289	1	Cells
LRRC28	0.133265	1	Cells
HNRNPA3	0.133089	1	Cells
ENSA	0.132936	0.531913	Cells
DNAJA4	0.132876	1	Cells
FBXO32	0.132871	0.000257652	Cells
SRSF5	0.132618	1	Cells
KMT2E	0.132502	1	Cells
RHOBTB1	0.131997	1.97065e-09	Cells
DCAF8	0.131832	0.207633	Cells
ANXA5	0.131822	1	Cells
SRL	0.131732	0.0015497	Cells
LINC00486	0.131719	2.42725e-15	Cells
SERGEF	0.131459	1	Cells
TOM1	0.131257	1	Cells
SOS2	0.130979	1	Cells
UBE2I	0.130665	1	Cells
NSRP1	0.130481	1	Cells
ROCK2	0.130273	1	Cells
ANKRD23	0.130176	0.213955	Cells
PDLIM7	0.12982	1	Cells
PCBP2	0.129776	1	Cells
MAP2K4	0.129752	1	Cells
PSMD1	0.129663	1	Cells
TGFBR1	0.129288	1	Cells
ERH	0.128979	1	Cells
2024-03-07	0.128781	1	Cells
GAS6	0.128679	1	Cells
YTHDC1	0.128513	1	Cells
CD99	0.12848	1	Cells
NSA2	0.1284	0.170329	Cells
RNF214	0.128175	1	Cells
WNK2	0.127886	0.00703561	Cells
SEMA6D	0.127718	1	Cells
GRB2	0.127641	1	Cells
PREP	0.127141	0.171851	Cells
MDN1	0.127074	1	Cells
IVD	0.126894	1	Cells
CTSF	0.126859	1	Cells
FEM1C	0.126847	1	Cells
FREM2	0.126514	1	Cells
AC055854.1	0.126166	1	Cells
TP53BP2	0.125938	1	Cells
HRAS	0.1257	0.732994	Cells
ZDHHC5	0.125575	1	Cells
KIF1B	0.125472	0.287298	Cells
SUDS3	0.125459	1	Cells
LTBP4	0.125289	1	Cells
NUDT3	0.125074	0.119111	Cells
LIMCH1	0.12502	0.00248269	Cells
WARS	0.124831	1	Cells
PNPLA8	0.124192	1	Cells
C9orf78	0.123961	1	Cells
MYO1C	0.123819	1	Cells
GYS1	0.123592	0.0179013	Cells
TBC1D17	0.123504	1	Cells
ZNF706	0.123452	1	Cells
UBAC1	0.123335	1	Cells
GOLGB1	0.123276	1	Cells
METTL25	0.123142	1	Cells
GNL1	0.123126	1	Cells
DR1	0.123112	1	Cells
HNRNPA2B1	0.122503	1	Cells
UXS1	0.122312	1	Cells
PPP1R12A	0.122295	1	Cells
FAM49B	0.122155	1	Cells
DHX30	0.121854	1	Cells
SEC14L1	0.121654	1	Cells
MIB1	0.121357	1	Cells
KLHL24	0.12109	1	Cells
PMEPA1	0.120934	1	Cells
DUSP22	0.120851	1	Cells
MT-ATP6	0.120818	2.80259e-42	Cells
MAT2A	0.120782	1	Cells
TMEM143	0.120676	1	Cells
RNF144B	0.120551	0.259526	Cells
ME1	0.120504	1	Cells
BST2	0.120271	1	Cells
RDH13	0.120131	1	Cells
CAVIN1	0.120072	0.00596857	Cells
MED24	0.120045	1	Cells
SORT1	0.120036	0.0305774	Cells
SPPL2A	0.11985	1	Cells
FYCO1	0.119604	4.52551e-06	Cells
EPN2	0.119394	1	Cells
IL13RA1	0.119335	1	Cells
FILIP1	0.119234	0.00550342	Cells
SMARCE1	0.119098	1	Cells
NUDCD3	0.11908	1	Cells
SYMPK	0.119022	1	Cells
TEAD4	0.118527	1	Cells
EFCAB14	0.118468	1	Cells
KIAA0232	0.118425	1	Cells
IDE	0.118412	1	Cells
TFDP1	0.118199	1	Cells
NUCB1	0.118068	1	Cells
CAMSAP2	0.118048	1	Cells
CCAR2	0.118029	1	Cells
LMCD1-AS1	0.11799	1	Cells
KLF13	0.117808	1	Cells
COL4A1	0.117778	0.0198114	Cells
XRN1	0.117361	1	Cells
MSRB3	0.117067	0.00354431	Cells
CLNS1A	0.116669	0.338133	Cells
NSD2	0.11633	1	Cells
CAPZB	0.116244	0.545718	Cells
ARHGAP5	0.116236	1	Cells
DCN	0.116217	4.85776e-05	Cells
QARS	0.116039	1	Cells
DICER1	0.115789	1	Cells
FNDC5	0.115748	0.417096	Cells
ZNF844	0.115542	1	Cells
AC006299.1	0.115449	1	Cells
CYP27A1	0.11539	1	Cells
CRADD	0.115122	1	Cells
FOXJ3	0.114896	0.587277	Cells
MIDN	0.114894	1	Cells
DCTN3	0.114891	1	Cells
MT-CO1	0.114883	5.01112e-83	Cells
TRIP11	0.114064	1	Cells
MRPL35	0.113713	1	Cells
DDX56	0.113698	1	Cells
ACYP1	0.113359	1	Cells
CFDP1	0.113234	1	Cells
ASB2	0.113206	3.17132e-06	Cells
DROSHA	0.113059	1	Cells
SLC40A1	0.112997	1	Cells
DNAJB1	0.112526	1	Cells
ATF7IP	0.112502	0.517253	Cells
UBE2G1	0.112053	0.00128539	Cells
HHATL	0.111785	0.869712	Cells
SAT2	0.111541	1	Cells
CEP68	0.111269	1	Cells
TAF15	0.11124	1	Cells
CALR	0.111195	1	Cells
ZNF655	0.111159	1	Cells
SEC61G	0.111135	1	Cells
STX4	0.110989	1	Cells
COL6A1	0.110962	1	Cells
NFATC1	0.110858	1	Cells
NIBAN1	0.110746	1.49519e-07	Cells
ACTR6	0.110425	1	Cells
SPAG16	0.110166	1	Cells
RAB1B	0.110056	1	Cells
NET1	0.109602	1	Cells
MYH14	0.109306	0.854846	Cells
SLC30A9	0.1093	1	Cells
SEC61B	0.109252	1	Cells
SH2B2	0.10884	1	Cells
TOR1AIP2	0.108534	1	Cells
SRSF1	0.108529	0.526027	Cells
ANP32E	0.108465	1	Cells
MAFA	0.10845	1	Cells
ERBIN	0.108363	0.621284	Cells
SCARB2	0.10836	0.00200379	Cells
SPATS2L	0.107894	0.00774125	Cells
FGFR1OP2	0.107837	1	Cells
ZBTB41	0.107692	1	Cells
NDUFAF4	0.107545	1	Cells
CAMK2G	0.107511	0.176689	Cells
TNKS2	0.107479	0.17064	Cells
RCC1L	0.1074	0.00125504	Cells
EIF2S2	0.107398	1	Cells
USP28	0.107343	1	Cells
AP1S2	0.107336	1	Cells
ASB10	0.107331	1	Cells
RPRD1B	0.107263	1	Cells
ELL2	0.107246	1	Cells
PSMD12	0.107041	1	Cells
ZNRF1	0.106892	0.0882413	Cells
SNX9	0.106515	1	Cells
ATP1B1	0.105931	4.11255e-06	Cells
ZNF710	0.105807	1	Cells
AC011346.1	0.10566	1	Cells
AL049828.1	0.105428	1	Cells
CCDC6	0.10538	1	Cells
CDK5RAP2	0.10492	1	Cells
PPP2R5E	0.104865	1	Cells
GOLIM4	0.104502	1	Cells
A2M	0.104494	1	Cells
EIF3J	0.104458	1	Cells
SUGT1	0.104039	1	Cells
AC002398.2	0.103442	1	Cells
ZMYND11	0.1033	1	Cells
LGR4	0.103153	1	Cells
CPSF6	0.10298	1	Cells
KHDRBS3	0.10276	1	Cells
C11orf58	0.102297	0.00159863	Cells
CD55	0.10222	1	Cells
CLINT1	0.102202	1	Cells
BMS1	0.101925	0.593302	Cells
PIK3CA	0.101862	1	Cells
PIK3R1	0.101742	1	Cells
PDGFRA	0.101734	1	Cells
TMEM201	0.10169	1	Cells
NSD3	0.101391	1	Cells
SLC2A4	0.101293	4.09805e-05	Cells
EIF4E2	0.101212	1	Cells
METTL7A	0.101041	1	Cells
SACS	0.101023	1	Cells
CEP63	0.100807	0.544648	Cells
DAZAP1	0.1004	1	Cells
BRWD1	0.100373	0.630097	Cells
MIR646HG	0.100168	1	Cells
OPTN	-0.100081	8.73447e-25	Cells
AP5M1	-0.100125	1	Cells
POLR3E	-0.100315	1	Cells
LSM7	-0.100621	0.00518588	Cells
RPS10	-0.100731	1	Cells
PCYT1A	-0.100746	0.0267601	Cells
TPM1	-0.100828	1.43692e-67	Cells
COPS2	-0.10124	1.30588e-05	Cells
MARCKS	-0.101514	1	Cells
SYPL1	-0.101527	6.19323e-05	Cells
RPS12	-0.101937	2.969e-36	Cells
SEC23A	-0.10235	1	Cells
GPX4	-0.102416	1.26351e-18	Cells
UCP3	-0.102631	0.00380028	Cells
LACTB	-0.10264	0.641444	Cells
EIF5	-0.102673	2.55124e-14	Cells
SH3BGR	-0.102689	1.96489e-16	Cells
REXO4	-0.102883	1	Cells
TRAP1	-0.102898	4.78125e-07	Cells
PPTC7	-0.102929	0.000120202	Cells
MDM2	-0.102934	0.00768499	Cells
IPO7	-0.103017	4.07901e-12	Cells
ARL6IP5	-0.103125	1.13563e-05	Cells
AIP	-0.103233	1	Cells
EMC2	-0.103413	1	Cells
SYNPO2L	-0.10354	1.83572e-17	Cells
ZFAND6	-0.103625	0.00920803	Cells
MPC1	-0.103689	3.09169e-14	Cells
MRPS17	-0.103809	1	Cells
MTHFD2	-0.103812	0.681047	Cells
OSER1	-0.103854	0.0362149	Cells
EXTL1	-0.103873	1	Cells
SARAF	-0.103919	7.10338e-08	Cells
ZNF331	-0.104035	1	Cells
COQ10A	-0.104173	2.44355e-06	Cells
SLC2A5	-0.104554	1	Cells
CCDC47	-0.104578	4.0567e-09	Cells
B3GNT5	-0.104681	0.714586	Cells
PAIP2B	-0.10479	7.64378e-06	Cells
VAMP5	-0.105251	1.07227e-06	Cells
SLC6A8	-0.105259	8.83119e-11	Cells
MRPS34	-0.105266	0.00175999	Cells
GTF2H5	-0.105353	0.783429	Cells
AMFR	-0.10559	0.0232835	Cells
C11orf74	-0.105684	1	Cells
FAN1	-0.105773	1	Cells
GUCD1	-0.105954	8.81267e-06	Cells
MRPL15	-0.105969	0.0310234	Cells
NIPSNAP2	-0.106084	5.59615e-20	Cells
PSMC6	-0.106126	0.00126425	Cells
ARL5A	-0.10627	1.0295e-07	Cells
PEX19	-0.106283	1	Cells
ATP6V1G1	-0.106486	1.90255e-06	Cells
FDX1	-0.106497	0.0481957	Cells
YIF1A	-0.106587	1	Cells
TRMT1L	-0.10666	0.0138291	Cells
POLDIP2	-0.106754	1.85856e-07	Cells
RER1	-0.1069	0.0647676	Cells
SDHC	-0.106944	2.72672e-06	Cells
RCSD1	-0.106985	1.83444e-09	Cells
CIAO2B	-0.107121	0.000382345	Cells
GPS1	-0.107302	0.0265884	Cells
CHURC1	-0.107343	3.84601e-08	Cells
MRPL47	-0.107398	0.0583507	Cells
BOLA3	-0.107486	7.0141e-05	Cells
PPP1CC	-0.107536	8.83885e-08	Cells
CKMT2	-0.1076	2.55736e-20	Cells
TIMM10	-0.10761	1	Cells
THAP3	-0.107812	1	Cells
MRPL33	-0.107821	1.77717e-17	Cells
NAA38	-0.107822	8.81941e-14	Cells
USP9X	-0.107894	7.09665e-12	Cells
RCHY1	-0.107994	1	Cells
RNF126	-0.108019	1	Cells
HSF1	-0.108172	1.65055e-08	Cells
ZBED1	-0.108344	0.00228913	Cells
GABPB1-IT1	-0.108407	1	Cells
UBE2Q2	-0.108483	1	Cells
FLAD1	-0.108785	1	Cells
EIF2S3	-0.108868	1	Cells
ACHE	-0.108981	0.00251964	Cells
PDE3A	-0.109057	5.08634e-09	Cells
GCDH	-0.109117	1	Cells
DUSP3	-0.109156	1.23425e-16	Cells
GOLGA2	-0.109282	1	Cells
MIF	-0.10935	0.00480554	Cells
ALKBH7	-0.109379	4.37019e-18	Cells
CHMP5	-0.109381	1	Cells
VPS37C	-0.109383	1	Cells
CXCL12	-0.109399	0.00858377	Cells
H2AFV	-0.109569	0.00754263	Cells
C12orf10	-0.109903	1	Cells
GFER	-0.110041	1	Cells
CUL5	-0.110406	1.79783e-12	Cells
PET100	-0.110482	0.68864	Cells
LMOD3	-0.110696	9.57798e-21	Cells
H2AFY	-0.110698	0.00462932	Cells
CRLS1	-0.110729	0.0139619	Cells
BLOC1S2	-0.110761	1	Cells
CNPY2	-0.110809	1	Cells
BMI1	-0.111125	0.0268469	Cells
NTMT1	-0.111245	0.330897	Cells
UQCRC2	-0.111277	4.17618e-13	Cells
FPGS	-0.111333	1	Cells
SNHG8	-0.111353	0.000359496	Cells
RPL3L	-0.111356	3.06325e-20	Cells
PYGM	-0.111473	6.15349e-28	Cells
CSDE1	-0.111544	2.7344e-26	Cells
DDX23	-0.11155	1	Cells
AL451062.1	-0.111711	4.26014e-29	Cells
CTBP1	-0.11187	7.38683e-06	Cells
PSMG4	-0.111877	0.0450047	Cells
KBTBD2	-0.112022	0.073027	Cells
SLC25A20	-0.112063	1	Cells
EIF3K	-0.112177	2.99461e-23	Cells
KIF1BP	-0.112241	0.254687	Cells
RAB5IF	-0.112413	1	Cells
LINC02609	-0.112446	1	Cells
GNB2	-0.112483	0.000137949	Cells
ABCF2	-0.112578	1	Cells
ROMO1	-0.112782	3.10147e-12	Cells
RDX	-0.112842	4.57327e-08	Cells
ZBTB25	-0.112903	1	Cells
STX7	-0.112906	1	Cells
PGM1	-0.112912	1.61471e-22	Cells
ANXA11	-0.113032	2.06745e-07	Cells
PNKD	-0.113051	9.24348e-06	Cells
AC133552.5	-0.113092	1	Cells
GNPAT	-0.113111	0.473592	Cells
RABGGTB	-0.113363	1	Cells
VPS28	-0.113519	3.24126e-06	Cells
NDUFB10	-0.113534	3.89074e-23	Cells
CTR9	-0.113841	1	Cells
RPN2	-0.113894	1	Cells
FKBP3	-0.114058	1.12187e-12	Cells
AGL	-0.114108	4.1341e-29	Cells
KLHL18	-0.114712	0.030296	Cells
RRAGD	-0.114728	2.30604e-13	Cells
FAM78A	-0.11473	1	Cells
QTRT1	-0.115145	1	Cells
LONP1	-0.115167	0.0176177	Cells
MT-ND4	-0.115368	1.86958e-70	Cells
FBXL3	-0.115522	1	Cells
IRF2BP2	-0.115773	0.535513	Cells
PSMB3	-0.115794	1	Cells
CREG1	-0.115826	0.336473	Cells
PRXL2A	-0.115943	1	Cells
NPM1	-0.116023	2.24187e-08	Cells
RILP	-0.11605	0.0433666	Cells
NDUFA11	-0.116191	4.53937e-23	Cells
AL133257.1	-0.116654	1	Cells
SLFN5	-0.116736	0.0715631	Cells
HIGD2A	-0.116764	1.38212e-26	Cells
UBC	-0.116842	3.40308e-22	Cells
PSMD2	-0.117214	4.01258e-16	Cells
MTURN	-0.11722	0.393777	Cells
TMOD1	-0.117279	1.79287e-17	Cells
FLOT1	-0.117394	1	Cells
PHB	-0.117445	0.00779972	Cells
ZNF106	-0.117511	4.94585e-30	Cells
CPT2	-0.11752	1	Cells
NDUFS4	-0.11752	4.23259e-07	Cells
APH1A	-0.117599	1	Cells
STK11	-0.117632	1.68375e-07	Cells
PPP1R2	-0.117772	2.78743e-11	Cells
PDK2	-0.118021	0.000223253	Cells
HERPUD1	-0.118228	0.0242718	Cells
PTGES2	-0.118333	0.344051	Cells
ARF6	-0.118722	1	Cells
SNX5	-0.118781	4.22876e-05	Cells
TMOD3	-0.118791	1	Cells
MBNL1-AS1	-0.118833	2.18754e-11	Cells
RPS7	-0.118872	1.44625e-34	Cells
WASHC5	-0.118902	1	Cells
GREM2	-0.119076	0.815647	Cells
SSR4	-0.11917	3.25645e-05	Cells
AIMP1	-0.119208	0.000204717	Cells
ATP6V0C	-0.119278	2.5185e-11	Cells
DYNC1H1	-0.119785	1.74372e-15	Cells
MTPAP	-0.119827	1	Cells
AC008124.1	-0.119953	1	Cells
DNAJC2	-0.120059	1	Cells
CKAP5	-0.120109	0.0837322	Cells
ARL6IP1	-0.120247	1	Cells
NDUFA1	-0.120435	1.73762e-21	Cells
EPHX1	-0.120526	1	Cells
GRHPR	-0.121055	2.91265e-05	Cells
FIBP	-0.121134	1	Cells
HADHA	-0.1212	2.87475e-16	Cells
CEBPG	-0.121204	4.12966e-08	Cells
PFKFB2	-0.121256	1	Cells
ANKRD40	-0.12131	8.28526e-07	Cells
COX4I1	-0.121343	3.48613e-34	Cells
NEB	-0.121541	8.7876e-168	Cells
RTF2	-0.121547	0.00276754	Cells
BLOC1S1	-0.121651	1.96284e-10	Cells
PEX1	-0.121687	1	Cells
BTBD6	-0.121692	1.71078e-06	Cells
MRPS28	-0.121767	1.51477e-05	Cells
RPUSD4	-0.121866	9.09782e-12	Cells
EIF3L	-0.121934	2.24646e-06	Cells
MRPS9	-0.121955	0.128927	Cells
NEPRO	-0.122046	1	Cells
PFKM	-0.122241	1.27672e-25	Cells
NMRK1	-0.122572	1	Cells
MMAB	-0.122626	1	Cells
CRBN	-0.122711	1	Cells
TMEM106B	-0.122771	3.32046e-06	Cells
JUND	-0.122898	9.51743e-05	Cells
FBXW5	-0.122901	2.71806e-06	Cells
GLRX5	-0.123025	9.99693e-12	Cells
IER3IP1	-0.123047	0.000169969	Cells
NBR1	-0.12332	0.00195199	Cells
YIPF7	-0.123436	0.353799	Cells
POPDC3	-0.123827	0.00444603	Cells
SF3B5	-0.123839	1	Cells
LAMTOR2	-0.124049	0.458156	Cells
BPGM	-0.124195	1	Cells
SMPD1	-0.124248	1	Cells
MRPS33	-0.124253	3.33388e-09	Cells
CHMP2B	-0.124321	0.120472	Cells
C1orf43	-0.124698	3.96916e-10	Cells
PRNP	-0.124825	1	Cells
STARD7	-0.125204	7.19332e-16	Cells
SMYD2	-0.125397	0.000197776	Cells
KHDRBS1	-0.125561	0.017713	Cells
NDUFS5	-0.125721	7.16636e-27	Cells
ZNF703	-0.125827	2.04082e-09	Cells
AIFM1	-0.125846	0.37139	Cells
ARMT1	-0.125953	1	Cells
SDHA	-0.126135	6.35628e-15	Cells
SRPRA	-0.12617	0.00783204	Cells
COPZ1	-0.126212	1	Cells
PPM1A	-0.126262	7.16001e-06	Cells
MRPL52	-0.126283	3.21416e-10	Cells
RIDA	-0.126351	1	Cells
EIF3B	-0.126353	3.44407e-06	Cells
RPL10	-0.126665	1.18913e-43	Cells
NUDT8	-0.126715	0.00739297	Cells
GSTM4	-0.12685	0.165343	Cells
ATPAF1	-0.126861	2.21809e-14	Cells
DNAJC19	-0.127021	3.76825e-13	Cells
DDX24	-0.127185	5.3055e-05	Cells
NDUFB8	-0.127194	5.93651e-10	Cells
MBD4	-0.12722	1	Cells
RRM2B	-0.127279	0.014764	Cells
XIRP2	-0.127575	3.06932e-47	Cells
CCT2	-0.127809	0.0560918	Cells
NABP2	-0.127822	1	Cells
COQ9	-0.127919	4.99137e-07	Cells
COPS3	-0.127978	0.00116202	Cells
NAA50	-0.128044	1.7614e-14	Cells
CDC5L	-0.128104	0.000179829	Cells
MRPS7	-0.128189	0.000243197	Cells
ZDHHC4	-0.128371	1	Cells
FAH	-0.12842	1	Cells
COMMD7	-0.128647	0.0456772	Cells
EIF3I	-0.128722	0.0030206	Cells
MXD4	-0.128725	1	Cells
SNX3	-0.128988	1.87779e-09	Cells
CAV3	-0.129258	9.25109e-09	Cells
MSANTD4	-0.129511	1	Cells
SERF2	-0.129511	1.82572e-16	Cells
B4GALT2	-0.129588	1	Cells
MTIF2	-0.129663	0.0765429	Cells
LINC02762	-0.130082	1	Cells
RAB40B	-0.130126	0.824108	Cells
RALGAPB	-0.130333	0.0282104	Cells
CLDND1	-0.130394	0.0692789	Cells
ATP6V0B	-0.130529	3.57119e-05	Cells
ABTB1	-0.130961	1	Cells
PCMT1	-0.131014	0.000155002	Cells
YPEL5	-0.131091	1	Cells
ZNRD1	-0.131146	1	Cells
ADSSL1	-0.131158	1.24364e-32	Cells
ENDOG	-0.131332	3.87102e-08	Cells
HNRNPK	-0.131386	3.26676e-08	Cells
NDUFB9	-0.131498	5.96798e-32	Cells
BLVRB	-0.13208	2.70506e-05	Cells
PRR34-AS1	-0.132442	0.00138773	Cells
EEF1D	-0.132512	3.84734e-29	Cells
SAR1B	-0.132523	4.24942e-16	Cells
RWDD2B	-0.132598	0.359458	Cells
USP38	-0.132814	1.48151e-05	Cells
PREB	-0.132826	1	Cells
HK1	-0.132883	0.000192891	Cells
PYROXD1	-0.132947	1	Cells
USF2	-0.133008	9.41628e-08	Cells
LDHB	-0.133237	2.26006e-05	Cells
RPAIN	-0.133313	1	Cells
SUMO3	-0.133445	0.0234108	Cells
PTS	-0.133455	0.941928	Cells
EXOC3	-0.133599	0.00369669	Cells
PACS2	-0.133622	0.0031348	Cells
MAP1LC3B	-0.133913	1.28922e-06	Cells
MYBPC1	-0.133967	4.86213e-117	Cells
KIAA1191	-0.133987	0.272293	Cells
SURF1	-0.134047	0.066801	Cells
THUMPD1	-0.134077	1	Cells
PCBD1	-0.134165	0.000231888	Cells
HOXC10	-0.134286	1.01241e-06	Cells
GLUL	-0.134384	5.17131e-21	Cells
ATP5MF	-0.13447	4.09124e-20	Cells
AKR1A1	-0.134963	1	Cells
RSL24D1	-0.135055	3.64273e-06	Cells
CDC123	-0.135309	1	Cells
ZBTB18	-0.135378	7.10061e-05	Cells
ELK4	-0.135499	0.00713309	Cells
IARS	-0.135529	2.10109e-07	Cells
GSTA4	-0.135558	1	Cells
EGLN2	-0.135562	1	Cells
ECHS1	-0.135854	4.91604e-10	Cells
ATP9A	-0.13611	1	Cells
ATP5MD	-0.13632	4.57651e-33	Cells
IMPAD1	-0.136458	0.149706	Cells
RPS27A	-0.136582	2.14754e-36	Cells
MCUR1	-0.136602	1	Cells
C17orf49	-0.1369	1	Cells
ATG4D	-0.13697	0.05236	Cells
MRPL36	-0.13715	0.313874	Cells
FKBP1A	-0.13739	1	Cells
GHITM	-0.137392	3.91936e-13	Cells
TMED7	-0.137412	0.00312967	Cells
MTDH	-0.137575	3.12539e-16	Cells
OST4	-0.137582	1.4784e-23	Cells
CALM3	-0.137619	2.78363e-06	Cells
NDUFC1	-0.138154	1.11921e-27	Cells
MICOS13	-0.138164	3.08741e-16	Cells
CDC37L1	-0.13818	1.07898e-07	Cells
PEX5	-0.13819	1	Cells
PEBP1	-0.138256	6.12728e-18	Cells
ABCF1	-0.138283	5.90905e-05	Cells
GSPT1	-0.138312	3.98998e-08	Cells
SSBP4	-0.138388	1	Cells
IDI1	-0.13846	2.43441e-09	Cells
HSPE1	-0.138506	1.89686e-11	Cells
UQCRH	-0.138585	4.07139e-27	Cells
DNAJA2	-0.138677	5.27029e-06	Cells
NUDCD2	-0.138681	1	Cells
DDB1	-0.138752	1.47344e-09	Cells
NOP56	-0.138983	1	Cells
MPI	-0.139021	1	Cells
LMO2	-0.13906	1	Cells
CCT5	-0.139082	0.00200559	Cells
METTL17	-0.139174	1	Cells
BCKDK	-0.139224	0.00646637	Cells
PLP2	-0.139392	1	Cells
COLGALT2	-0.139548	1	Cells
BTBD1	-0.139604	1.88321e-14	Cells
MALSU1	-0.14002	1.07133e-07	Cells
NDUFA12	-0.140072	1.82268e-25	Cells
LSM2	-0.140209	1	Cells
EIF1AY	-0.140213	0.0628453	Cells
STIP1	-0.140275	0.000286131	Cells
LAMTOR3	-0.140448	1	Cells
TEX261	-0.140586	1	Cells
COQ4	-0.140929	1	Cells
NDUFAF1	-0.141054	1	Cells
WDR45	-0.14117	1	Cells
RPL18A	-0.141205	6.22183e-40	Cells
IRX3	-0.141444	0.374651	Cells
ZNF784	-0.141482	1	Cells
NDUFAB1	-0.141768	1.14972e-20	Cells
UQCRC1	-0.141783	1.42909e-23	Cells
TAF9	-0.141951	1	Cells
MAPRE1	-0.14208	1	Cells
PSMD4	-0.142117	1.35955e-08	Cells
CCNG1	-0.142378	2.69139e-20	Cells
PGRMC2	-0.142431	1	Cells
ETFA	-0.14275	1.05014e-08	Cells
PNRC1	-0.143027	7.49248e-18	Cells
CDV3	-0.143069	6.12966e-20	Cells
KEAP1	-0.143227	6.39458e-08	Cells
METTL9	-0.14326	7.9424e-05	Cells
CCDC28B	-0.143344	0.00073739	Cells
DNAJB12	-0.143502	1	Cells
KPNA4	-0.14356	8.88671e-17	Cells
TBC1D10B	-0.143574	1	Cells
GTF3A	-0.14367	4.72187e-13	Cells
KCNA7	-0.143682	1	Cells
EMC3	-0.143806	0.00383313	Cells
PAIP2	-0.143911	2.16147e-08	Cells
TRIB1	-0.143921	1	Cells
USP8	-0.144148	1	Cells
FKBP4	-0.144201	1	Cells
ZNF511	-0.144375	0.00278282	Cells
EIF1AX	-0.144643	1.90244e-09	Cells
MRPL50	-0.144669	1	Cells
TSR1	-0.144839	0.179905	Cells
TMEM256	-0.144972	0.24976	Cells
COA5	-0.144975	3.30234e-06	Cells
DPM1	-0.145052	0.130288	Cells
PUF60	-0.145075	1	Cells
UNC79	-0.145112	1	Cells
FOXN2	-0.145139	1	Cells
METTL26	-0.145357	4.54046e-09	Cells
GPD1L	-0.145441	1.19386e-06	Cells
UQCC2	-0.145736	8.41261e-17	Cells
ZNF768	-0.14577	0.238262	Cells
ANKLE2	-0.1458	1	Cells
GNL2	-0.145937	1	Cells
AGPAT2	-0.145976	1	Cells
ATOX1	-0.146044	0.424505	Cells
NDUFB7	-0.146093	7.82141e-22	Cells
TTN	-0.146254	0	Cells
PLRG1	-0.146538	1	Cells
RFK	-0.1469	1	Cells
ELOB	-0.1469	8.66418e-37	Cells
OSTC	-0.147167	1	Cells
MPST	-0.147311	1	Cells
DESI1	-0.147322	1	Cells
COA4	-0.147418	0.00838215	Cells
PPIG	-0.147468	0.0163597	Cells
COPE	-0.147475	0.0300913	Cells
MDH1	-0.147479	5.42978e-27	Cells
GGCT	-0.147482	1	Cells
MTLN	-0.147564	1.06745e-39	Cells
ANAPC13	-0.147569	1	Cells
MESP1	-0.147805	1	Cells
BTF3L4	-0.147988	0.314715	Cells
SNRPG	-0.148136	0.0304096	Cells
RPS5	-0.148181	3.54245e-44	Cells
DCPS	-0.148204	1	Cells
MFF	-0.148277	4.26424e-10	Cells
GFM1	-0.148408	0.0263961	Cells
FMC1	-0.148623	1.62269e-07	Cells
SMCO1	-0.148923	6.72561e-05	Cells
LTN1	-0.14907	0.0374372	Cells
RACK1	-0.149677	8.40543e-32	Cells
NME2	-0.149696	7.33018e-23	Cells
AKAP7	-0.149818	0.0502027	Cells
VDAC3	-0.149905	2.67008e-15	Cells
MTFR1L	-0.150035	0.00116852	Cells
MRPS2	-0.150048	1	Cells
RPL32	-0.150164	5.98577e-51	Cells
COPZ2	-0.150167	0.00437638	Cells
LMO4	-0.150184	0.173983	Cells
IDI2	-0.150238	0.00194749	Cells
HSPA1A	-0.150252	8.22501e-07	Cells
NDUFC2	-0.150366	3.64575e-20	Cells
MESD	-0.15056	1	Cells
RPS21	-0.150668	2.29744e-34	Cells
ALAD	-0.150672	1	Cells
RHOB	-0.150993	1	Cells
ALDH5A1	-0.151071	0.00027806	Cells
RBM17	-0.151241	0.0139811	Cells
RPS8	-0.151244	1.50278e-52	Cells
WDR89	-0.151322	1	Cells
NDUFB11	-0.151451	2.58985e-33	Cells
TSG101	-0.151471	0.644534	Cells
COA8	-0.151554	2.96379e-19	Cells
H2AFJ	-0.151662	1	Cells
ATP5PF	-0.151762	2.87634e-27	Cells
ACTN2	-0.15177	5.82038e-50	Cells
NDFIP2	-0.151803	0.00367317	Cells
CALML6	-0.15186	1.21277e-14	Cells
SUMO1	-0.151919	1	Cells
AL356599.1	-0.151946	1	Cells
NRBP1	-0.152006	0.00499892	Cells
LDHA	-0.15205	5.24693e-34	Cells
EIF4G2	-0.152072	6.69081e-28	Cells
PDHX	-0.152117	4.32386e-09	Cells
CALM1	-0.152211	3.74339e-23	Cells
PINK1	-0.152371	1.59007e-19	Cells
PSMA1	-0.152647	9.69432e-06	Cells
WSB2	-0.152781	0.64128	Cells
LINC01563	-0.152999	1	Cells
ARMC1	-0.153206	1	Cells
MZT2B	-0.153404	2.94622e-13	Cells
NDUFA7	-0.15353	7.62923e-20	Cells
TRAPPC5	-0.15357	1.44972e-05	Cells
GAS5	-0.153612	1	Cells
AIMP2	-0.153674	0.00878921	Cells
GTPBP8	-0.153755	1	Cells
CIAO2A	-0.153762	0.00726682	Cells
SNRPA1	-0.153835	1	Cells
ATP5PD	-0.154262	1.05679e-33	Cells
HIST1H2AC	-0.154358	1	Cells
THUMPD3	-0.154825	1	Cells
TSC22D4	-0.154913	1	Cells
C22orf39	-0.154936	2.23309e-05	Cells
SLC41A3	-0.154941	0.690564	Cells
IMMT	-0.155144	1.32014e-12	Cells
KDELR2	-0.155206	1	Cells
MTMR2	-0.155305	1	Cells
ZYG11B	-0.155573	5.19539e-20	Cells
BRD3	-0.155695	0.00348687	Cells
PTCD2	-0.155753	1	Cells
MLX	-0.156022	1	Cells
HEBP2	-0.156065	3.56677e-16	Cells
PPP5C	-0.156095	0.251038	Cells
RPL36	-0.156203	1.76295e-35	Cells
POLR2C	-0.156699	0.154916	Cells
MRPS11	-0.157083	1	Cells
C5orf24	-0.157213	1	Cells
VAMP3	-0.157272	0.200178	Cells
ISOC2	-0.15744	0.000593799	Cells
PLAA	-0.157484	1	Cells
SELENOT	-0.157613	1	Cells
RPS15	-0.157733	1.99819e-37	Cells
C11orf68	-0.157881	1	Cells
SLC25A6	-0.158004	0.0138732	Cells
GLRX	-0.158011	1	Cells
GALNT11	-0.158068	0.0629822	Cells
COX6A2	-0.158083	1.72164e-81	Cells
ATF4	-0.158102	2.21583e-17	Cells
GABPA	-0.15813	1	Cells
NAA10	-0.158243	1	Cells
NDUFS6	-0.158391	5.13407e-16	Cells
IFNAR1	-0.158485	0.126157	Cells
ASB1	-0.158614	0.273277	Cells
DNTTIP2	-0.158623	0.0226472	Cells
SMS	-0.158937	0.34856	Cells
LSM10	-0.159291	2.51669e-05	Cells
MRLN	-0.159508	0.0223614	Cells
TRIM69	-0.159809	1	Cells
ZCRB1	-0.159941	6.68164e-11	Cells
DDX3X	-0.160171	3.61493e-06	Cells
ARL2BP	-0.160352	1	Cells
BRK1	-0.160515	0.0147175	Cells
DCTD	-0.160601	1	Cells
CCT7	-0.161023	2.91776e-05	Cells
TNNI2	-0.161035	2.65208e-72	Cells
NELFB	-0.161133	0.00388316	Cells
CACYBP	-0.161337	5.24912e-09	Cells
SSR3	-0.161419	4.11659e-05	Cells
C1orf122	-0.161477	1	Cells
MEGF9	-0.161588	1	Cells
TSSC4	-0.161869	1	Cells
TPD52L2	-0.16201	1	Cells
RPL12	-0.162224	3.83169e-45	Cells
EBNA1BP2	-0.162408	1	Cells
ATP5MC1	-0.162416	4.55705e-19	Cells
RPP21	-0.162497	0.0785604	Cells
SELENOP	-0.162566	1.85465e-12	Cells
SDHD	-0.162804	1.26056e-07	Cells
RPS4Y1	-0.162971	1.22247e-15	Cells
MIEN1	-0.162981	0.899852	Cells
EXOC5	-0.163103	0.00116821	Cells
POLR2L	-0.16345	1.07825e-25	Cells
AL365259.1	-0.16383	1	Cells
SNAPIN	-0.163874	0.48083	Cells
FBXO3	-0.164002	7.14433e-07	Cells
RHOU	-0.164162	1	Cells
WBP11	-0.164234	0.14327	Cells
MGST3	-0.164289	1.28651e-24	Cells
EIF4G1	-0.164525	3.04464e-18	Cells
SYF2	-0.16456	0.00263079	Cells
PHF10	-0.16481	3.57005e-06	Cells
NDUFV3	-0.164881	2.4723e-21	Cells
HSPA4	-0.165097	3.59005e-06	Cells
ATP2A2	-0.165178	3.90552e-70	Cells
EIF2B5	-0.165195	0.037366	Cells
RANBP1	-0.165572	0.0605637	Cells
TPM3	-0.165673	1.97427e-61	Cells
PRDX1	-0.165694	1.38611e-13	Cells
DRG1	-0.16576	0.0345191	Cells
HJV	-0.165842	3.24788e-14	Cells
NDUFB3	-0.166085	9.54817e-27	Cells
BROX	-0.166277	0.259885	Cells
FAU	-0.166518	1.65129e-46	Cells
CDC26	-0.166573	1	Cells
NUP85	-0.166617	1	Cells
FECH	-0.166684	1	Cells
PSMA2	-0.166896	4.62772e-07	Cells
COQ8A	-0.167732	7.77433e-36	Cells
SYAP1	-0.167747	0.0267688	Cells
PSMB5	-0.16784	1.15752e-07	Cells
SELENOH	-0.167875	1	Cells
ATP5F1E	-0.168067	5.11914e-39	Cells
GTF3C4	-0.168178	1	Cells
EIF4B	-0.168386	4.84707e-25	Cells
PCNP	-0.168387	0.000127996	Cells
ATP5MC2	-0.168404	2.36181e-41	Cells
TMEM160	-0.168518	7.3239e-05	Cells
TIMM21	-0.16855	1	Cells
FBXO30	-0.168731	1	Cells
ENPP4	-0.168775	0.0549532	Cells
RTN4	-0.168819	1.19723e-26	Cells
DUSP23	-0.168983	1	Cells
NDUFA5	-0.169143	4.52375e-07	Cells
ZNHIT3	-0.169149	1	Cells
PGPEP1L	-0.169169	1	Cells
WIPI2	-0.169396	0.314571	Cells
VPS51	-0.169641	1.91785e-07	Cells
AKAP1	-0.169711	2.94774e-05	Cells
SUB1	-0.170009	1.25587e-09	Cells
TUBA4A	-0.170158	8.50536e-22	Cells
UQCR11	-0.170161	4.7393e-42	Cells
MCMBP	-0.170576	0.1764	Cells
YBX3	-0.17061	8.84161e-54	Cells
CIAPIN1	-0.170615	1	Cells
PHPT1	-0.170804	1.3341e-24	Cells
HCFC1R1	-0.170863	4.02585e-19	Cells
ATP6V1D	-0.171159	1	Cells
AKR1C2	-0.17131	1	Cells
TRAPPC8	-0.17167	0.0719771	Cells
PSME3	-0.171764	1	Cells
EMC6	-0.17186	3.41347e-05	Cells
RPS28	-0.172059	3.8988e-51	Cells
HNRNPF	-0.172249	0.00604187	Cells
NKIRAS2	-0.172288	1	Cells
FABP3	-0.17236	3.01536e-27	Cells
PRMT1	-0.172441	9.11195e-09	Cells
FEM1A	-0.172484	4.46518e-26	Cells
PHB2	-0.172646	3.36189e-17	Cells
OTUB1	-0.172759	0.00429921	Cells
MRPL14	-0.172915	2.04086e-12	Cells
GYG1	-0.173344	5.18407e-17	Cells
PPP1CA	-0.173455	9.99812e-05	Cells
MEF2C-AS2	-0.173497	1	Cells
TXN	-0.173527	0.00406597	Cells
SELENOK	-0.173532	3.88285e-05	Cells
COPS4	-0.173631	2.72205e-05	Cells
PELO	-0.173924	1	Cells
KLHL41	-0.174084	7.78326e-46	Cells
DGCR6L	-0.17415	6.9438e-05	Cells
RPS19BP1	-0.174343	6.54358e-07	Cells
EIF1B	-0.174367	0.0627185	Cells
PSMD7	-0.174551	1.24007e-10	Cells
MRPL45	-0.174567	0.00518593	Cells
PARK7	-0.174813	4.23634e-21	Cells
COPS6	-0.174825	5.11641e-05	Cells
EIF3H	-0.174945	1.79244e-20	Cells
TUFM	-0.174945	1.46215e-08	Cells
PPM1G	-0.174951	0.00217493	Cells
MFN2	-0.17509	5.45899e-11	Cells
SSR2	-0.17513	0.604376	Cells
SLC48A1	-0.175243	1	Cells
MLF2	-0.175348	0.000268229	Cells
TSTD2	-0.175418	1	Cells
TIMM44	-0.175468	1	Cells
CPT1B	-0.175529	0.00388035	Cells
HLA-E	-0.175668	0.00105556	Cells
PPP1R14B	-0.175688	2.52044e-14	Cells
DARS	-0.176293	0.000328582	Cells
SHMT1	-0.176588	0.00149411	Cells
PRPF31	-0.176751	1	Cells
RAD21	-0.176839	2.09418e-08	Cells
MRPL37	-0.177018	1.29747e-09	Cells
TSN	-0.1771	0.0132481	Cells
RTCB	-0.177135	1	Cells
NENF	-0.177194	1.00362e-19	Cells
ACADM	-0.177262	5.82308e-18	Cells
GRPEL1	-0.177798	0.0609799	Cells
MRPL16	-0.178301	0.0143539	Cells
MCFD2	-0.178837	0.327173	Cells
TUBB	-0.178851	0.0266646	Cells
ATP6AP1	-0.17908	0.522129	Cells
RXYLT1	-0.179517	1	Cells
CHMP2A	-0.179999	0.0424384	Cells
MYORG	-0.180453	6.40702e-09	Cells
C3orf18	-0.180505	1	Cells
ATP5F1B	-0.180682	4.11638e-36	Cells
MRPL27	-0.180724	0.000637521	Cells
RBM18	-0.180907	0.012818	Cells
AC010680.2	-0.180978	2.30221e-27	Cells
RPL28	-0.181318	2.94292e-47	Cells
SPR	-0.181384	0.00215129	Cells
LMNB2	-0.181857	0.104739	Cells
IMPDH2	-0.182552	0.000199551	Cells
ATP5MC3	-0.18273	1.36154e-31	Cells
HSBP1	-0.182793	0.00179027	Cells
RNF7	-0.182848	8.16367e-12	Cells
KCTD9	-0.182856	1	Cells
BHLHE41	-0.18303	3.60166e-06	Cells
LAPTM4A	-0.183038	0.681908	Cells
ARMC6	-0.183055	1	Cells
RPL37	-0.18321	2.6955e-51	Cells
PPIF	-0.183223	0.0339385	Cells
RCBTB1	-0.183339	1	Cells
CAVIN2	-0.183414	1	Cells
PTP4A2	-0.183477	1.10817e-16	Cells
FAM76A	-0.183499	1	Cells
NDUFA8	-0.183602	3.10404e-06	Cells
TTL	-0.183608	1	Cells
SMIM10L1	-0.183773	1.03638e-09	Cells
PSMB6	-0.183846	3.31503e-16	Cells
ATP6V0D1	-0.183847	0.121015	Cells
HMGN2	-0.184302	3.39423e-06	Cells
TIPRL	-0.184433	0.265681	Cells
SSPN	-0.184941	4.97532e-13	Cells
MDH2	-0.185035	3.56996e-29	Cells
CTNNAL1	-0.185111	0.00256431	Cells
WDR46	-0.185237	1	Cells
ATP6V1E1	-0.18527	0.00602397	Cells
DECR1	-0.185363	1.71941e-09	Cells
ASB8	-0.1854	1.48183e-11	Cells
BTF3	-0.185555	8.71361e-31	Cells
CLPP	-0.185634	0.513636	Cells
IFI27	-0.185766	0.301824	Cells
AK6	-0.186109	0.961605	Cells
STK17A	-0.186183	1	Cells
RPLP1	-0.186235	3.2504e-146	Cells
MAF	-0.186546	4.31053e-12	Cells
HAT1	-0.186704	0.781335	Cells
PLAAT3	-0.186854	0.000235825	Cells
CGRRF1	-0.18689	0.026711	Cells
CRIPT	-0.186892	1	Cells
STBD1	-0.186899	4.07071e-19	Cells
UBALD2	-0.186979	0.141926	Cells
FITM1	-0.187381	1.72477e-24	Cells
BAP1	-0.187445	1	Cells
RUVBL2	-0.187528	0.424983	Cells
ERAL1	-0.187587	1	Cells
PDHA1	-0.18774	1.93587e-10	Cells
ZNF770	-0.187894	0.000621767	Cells
RBX1	-0.188009	3.81837e-11	Cells
PYCR2	-0.188013	1	Cells
RPL39	-0.188023	3.77949e-62	Cells
GTF2A2	-0.188331	0.000130567	Cells
TSPAN3	-0.18834	2.88714e-11	Cells
MICOS10	-0.188452	1.61829e-13	Cells
SCCPDH	-0.188652	3.04169e-08	Cells
MSN	-0.188837	1	Cells
FGD5-AS1	-0.188959	9.63966e-05	Cells
YME1L1	-0.189155	3.89619e-12	Cells
HADH	-0.189355	2.64594e-12	Cells
CITED2	-0.189455	0.122754	Cells
ABHD17A	-0.189675	0.311215	Cells
ALDH3A2	-0.189946	1	Cells
VBP1	-0.190354	1.2904e-07	Cells
MPHOSPH10	-0.190424	0.413616	Cells
TPT1	-0.190455	3.39727e-136	Cells
TRUB2	-0.190457	1	Cells
ATP5MPL	-0.190592	1.93508e-31	Cells
THAP12	-0.190609	1	Cells
RNF187	-0.191127	0.000975041	Cells
DAXX	-0.191687	1	Cells
RPS9	-0.19221	4.43321e-46	Cells
NAMPT	-0.192396	1.99536e-05	Cells
GNG10	-0.192582	1	Cells
DUT	-0.192614	0.0114732	Cells
PAM16	-0.192647	1.67655e-08	Cells
MRPL18	-0.192697	0.0294423	Cells
PFDN5	-0.192856	1.0175e-33	Cells
ATP5MG	-0.192906	4.39716e-41	Cells
AL136038.5	-0.193467	0.780834	Cells
CCT8	-0.193755	2.88492e-06	Cells
TMEM203	-0.193921	1	Cells
NDUFA9	-0.19395	2.1583e-06	Cells
EIF3D	-0.194088	0.732976	Cells
CCDC82	-0.194174	1	Cells
POP7	-0.194326	1	Cells
PDLIM2	-0.194445	0.0010098	Cells
IMP3	-0.195164	1	Cells
KLHL40	-0.195421	1.69563e-09	Cells
HMGB2	-0.195488	0.364862	Cells
PPP1CB	-0.195816	1.63191e-25	Cells
TMEM258	-0.195868	7.48563e-16	Cells
AC106791.1	-0.196044	1	Cells
SMDT1	-0.196109	3.25842e-21	Cells
MRPL41	-0.196252	5.76633e-34	Cells
RPS29	-0.196497	3.94128e-44	Cells
EMD	-0.196571	0.00994493	Cells
FAM162A	-0.196657	5.667e-09	Cells
RPS26	-0.196675	2.80631e-60	Cells
YKT6	-0.196708	1	Cells
RPS24	-0.196798	8.84381e-58	Cells
MYNN	-0.19681	1	Cells
PDCL3	-0.197161	0.658806	Cells
ADSL	-0.197188	8.26286e-21	Cells
ADRM1	-0.197276	0.000526294	Cells
UQCRQ	-0.197359	5.59508e-45	Cells
TOR1AIP1	-0.197421	0.00531058	Cells
LSM4	-0.197693	0.704585	Cells
USP5	-0.197835	0.00961508	Cells
TRIM28	-0.197881	0.00816565	Cells
ANAPC11	-0.198069	7.16111e-27	Cells
CSTB	-0.198189	1	Cells
SYNM	-0.19823	4.17779e-46	Cells
RPL35A	-0.198475	1.66267e-54	Cells
VDAC1	-0.198657	1.63738e-40	Cells
ECI1	-0.198734	2.68483e-17	Cells
FIS1	-0.199048	1.66068e-25	Cells
PARP1	-0.199091	5.26398e-09	Cells
UFC1	-0.199208	0.00018613	Cells
CBR1	-0.199445	1	Cells
CHCHD10	-0.199675	2.19279e-53	Cells
BCCIP	-0.199804	1	Cells
DLAT	-0.199862	1.71336e-08	Cells
C1QBP	-0.199964	2.91213e-12	Cells
SMIM20	-0.200132	5.48571e-06	Cells
ELAC2	-0.200239	1	Cells
HINT1	-0.200319	5.89849e-38	Cells
SCAMP3	-0.200512	1	Cells
PKIA	-0.200609	1.39873e-34	Cells
MRPL51	-0.200789	6.41613e-17	Cells
SERINC1	-0.200842	5.29823e-11	Cells
HMGCL	-0.201116	0.0203424	Cells
DNAJA1	-0.201147	1.10604e-05	Cells
MYL2	-0.201433	7.19275e-215	Cells
ARL1	-0.201467	1	Cells
ARPC1A	-0.201592	1	Cells
AC016876.1	-0.201795	1	Cells
LRRTM3	-0.202121	1	Cells
MED16	-0.202182	1	Cells
IGBP1	-0.202248	1.62274e-05	Cells
PDLIM1	-0.202734	4.97069e-07	Cells
PSMA3	-0.202967	0.00720543	Cells
CENPB	-0.202973	0.232549	Cells
TMEM8B	-0.202985	0.240908	Cells
ACADS	-0.203015	5.67607e-10	Cells
PITRM1	-0.203054	0.000460578	Cells
PHYH	-0.203076	9.50206e-19	Cells
CLPX	-0.203352	0.00126122	Cells
DHX15	-0.203808	7.0195e-06	Cells
DEXI	-0.203903	5.39813e-10	Cells
HOXC-AS1	-0.203935	1	Cells
RPS14	-0.204054	8.91768e-55	Cells
FDPS	-0.204223	1	Cells
ECH1	-0.204423	1.12287e-17	Cells
RGP1	-0.204425	1	Cells
ZRANB1	-0.204617	3.03799e-07	Cells
SGCB	-0.204681	1.87622e-15	Cells
MRPS24	-0.205516	2.63211e-24	Cells
FTSJ3	-0.205525	1	Cells
PSMA7	-0.205761	4.88568e-29	Cells
TCP1	-0.205775	0.000876541	Cells
RSL1D1	-0.205873	1.91698e-11	Cells
SLC38A1	-0.206098	1	Cells
PSMB1	-0.206227	1.63362e-11	Cells
GYPC	-0.206259	8.33819e-21	Cells
LSMEM2	-0.206292	1	Cells
POMP	-0.20649	1.12031e-10	Cells
SNRPD2	-0.206626	1.94817e-09	Cells
ZNF181	-0.206704	1	Cells
ESD	-0.206942	0.052732	Cells
SNRPE	-0.207173	0.575481	Cells
FTCDNL1	-0.207196	1	Cells
PPP1R3C	-0.207346	1.16118e-31	Cells
COX11	-0.207443	0.0119909	Cells
COX7C	-0.207501	5.08017e-63	Cells
IL17D	-0.207593	4.57495e-07	Cells
AC100810.1	-0.207718	1	Cells
COX6C	-0.207769	1.97365e-38	Cells
TBL3	-0.208219	1	Cells
TRAPPC1	-0.208492	0.276608	Cells
ATRAID	-0.208535	7.84835e-05	Cells
RPLP0	-0.20901	1.03129e-57	Cells
KIF5B	-0.209216	1.81633e-14	Cells
UFD1	-0.20936	0.0114848	Cells
MRPS10	-0.209422	0.0297284	Cells
MRPL10	-0.209616	1	Cells
KLHL34	-0.209813	1	Cells
AC005323.2	-0.210011	7.82376e-28	Cells
NUDT4	-0.210246	2.34413e-10	Cells
SPCS3	-0.210306	0.00485244	Cells
VAMP4	-0.210349	1	Cells
PPCS	-0.210356	0.43613	Cells
MCRIP2	-0.210429	4.70842e-12	Cells
MRPL34	-0.21062	2.21066e-16	Cells
SETD7	-0.210973	8.5512e-14	Cells
RIOK3	-0.211255	6.53129e-07	Cells
CCDC167	-0.211316	1	Cells
LAMTOR5	-0.211444	2.3343e-08	Cells
HSPB1	-0.211459	6.76567e-45	Cells
TPRKB	-0.211491	0.457376	Cells
ECI2	-0.211585	5.01821e-09	Cells
ATP5PB	-0.211618	1.75947e-18	Cells
AC024610.2	-0.211672	1	Cells
IPO5	-0.211906	4.26829e-13	Cells
COPRS	-0.211916	1	Cells
FAM200B	-0.212286	0.278188	Cells
SOD2	-0.212587	1.33608e-18	Cells
PRPF4	-0.212634	1	Cells
DCAF12	-0.21276	1	Cells
RPL24	-0.212913	2.79358e-58	Cells
LSM3	-0.212917	0.00045152	Cells
HSPA9	-0.213193	2.05954e-18	Cells
RPL18	-0.214211	5.43629e-47	Cells
TIMMDC1	-0.214371	1.35485e-05	Cells
MRPS30	-0.215124	3.19749e-05	Cells
XAB2	-0.215703	1	Cells
MRPS27	-0.216344	0.446162	Cells
EIF4EBP2	-0.216438	2.83036e-09	Cells
NR2F6	-0.216456	0.00230692	Cells
LRRC47	-0.216478	2.81674e-10	Cells
B2M	-0.216559	2.58051e-16	Cells
GPN3	-0.216908	0.165998	Cells
RWDD4	-0.219099	0.000910065	Cells
RPL30	-0.219335	1.72561e-91	Cells
PSMA6	-0.21983	1.34094e-10	Cells
THAP11	-0.219953	0.405993	Cells
TIMM8B	-0.22012	3.71545e-20	Cells
RPS2	-0.220232	1.98324e-55	Cells
CRNDE	-0.220371	1	Cells
JPT1	-0.220661	1	Cells
DLD	-0.220671	6.74739e-14	Cells
CTSB	-0.221553	0.0520041	Cells
SNHG16	-0.221642	1.39567e-14	Cells
ARAP1	-0.222034	1	Cells
RPS19	-0.222067	1.00023e-53	Cells
NGRN	-0.222148	1.08382e-12	Cells
MMADHC	-0.222234	1.49945e-07	Cells
NDUFAF8	-0.222316	1.59108e-10	Cells
TMEM109	-0.222382	0.0143928	Cells
SPTY2D1	-0.22239	1	Cells
POLD4	-0.222822	0.000467356	Cells
UXT	-0.222955	2.56845e-05	Cells
TOMM7	-0.223455	2.76562e-63	Cells
NT5C1A	-0.223476	1	Cells
LYRM7	-0.223655	0.00410562	Cells
QDPR	-0.223711	0.000351142	Cells
PLN	-0.224824	3.46275e-22	Cells
BCL2L12	-0.224878	1	Cells
NDUFV1	-0.224931	5.49444e-22	Cells
LONRF2	-0.225057	0.00890212	Cells
HEXIM1	-0.225084	1	Cells
TRMT112	-0.2251	1.11418e-08	Cells
TALDO1	-0.22537	0.000149894	Cells
RPL7A	-0.225394	5.64375e-59	Cells
RPL26L1	-0.225397	1	Cells
CCDC126	-0.22541	1	Cells
CUTC	-0.22592	1.53995e-16	Cells
ALDH9A1	-0.225939	0.0055638	Cells
GABARAP	-0.226134	2.03257e-26	Cells
MRPL9	-0.226401	0.0609772	Cells
AP2S1	-0.226789	0.000120708	Cells
MRPL57	-0.226933	9.54801e-12	Cells
AZIN1	-0.227085	0.0810561	Cells
C12orf73	-0.22736	0.0004475	Cells
NANOS1	-0.227364	0.000204346	Cells
FOXO4	-0.227506	1	Cells
ARL14EP	-0.227519	1	Cells
CISD1	-0.227679	9.12243e-11	Cells
NDUFA6	-0.227896	1.15233e-39	Cells
RPS6	-0.22795	2.07749e-53	Cells
KARS	-0.227984	4.48061e-08	Cells
HNRNPA0	-0.228086	9.34709e-06	Cells
ZNF460	-0.228265	1	Cells
COA6	-0.228278	2.15847e-05	Cells
ACAA2	-0.228385	1	Cells
SMIM41	-0.228627	1	Cells
COMMD6	-0.228944	2.07262e-12	Cells
APIP	-0.229205	2.37567e-08	Cells
AMZ2	-0.229258	0.143382	Cells
COMMD5	-0.229585	1	Cells
ALDH2	-0.229623	6.11817e-12	Cells
ST13	-0.229624	2.45058e-32	Cells
HEATR3	-0.229805	0.12039	Cells
CS	-0.230175	5.85697e-22	Cells
FUNDC2	-0.230204	1.01078e-20	Cells
RPL19	-0.230387	2.18928e-71	Cells
COX14	-0.23049	1.35617e-17	Cells
RNF11	-0.230602	6.47134e-10	Cells
LGALSL	-0.231049	0.000569365	Cells
CDKN2AIPNL	-0.23188	0.000131529	Cells
RNF31	-0.232303	1	Cells
NOP9	-0.232602	1	Cells
POLL	-0.232613	1	Cells
EMC4	-0.232619	3.95649e-05	Cells
MRPS36	-0.23262	4.47276e-09	Cells
GID4	-0.232701	0.102889	Cells
POLRMT	-0.233084	0.0908891	Cells
RABAC1	-0.233302	0.289728	Cells
SCRN3	-0.233351	1	Cells
NDUFAF3	-0.233937	3.11415e-09	Cells
TRIAP1	-0.234303	1	Cells
MT-ND1	-0.234377	9.98867e-205	Cells
CYB5A	-0.234396	1	Cells
EIF1	-0.235364	1.36992e-57	Cells
BRCC3	-0.235608	1	Cells
COX7B	-0.235693	2.74948e-53	Cells
ALKBH3	-0.235711	1	Cells
DDX49	-0.235931	0.0357625	Cells
PRDX6	-0.236089	9.89005e-30	Cells
TRPT1	-0.23618	2.61983e-15	Cells
RAB11A	-0.23625	1	Cells
GATM	-0.236299	4.72046e-11	Cells
RPS3A	-0.236334	5.95004e-71	Cells
DCUN1D5	-0.236446	1.93312e-05	Cells
TARS	-0.236466	1	Cells
BOD1	-0.236534	9.50318e-05	Cells
TIMM17A	-0.236833	1.75112e-06	Cells
NCOA4	-0.236973	8.79386e-10	Cells
BNIP2	-0.237116	3.73041e-07	Cells
CCDC127	-0.237145	0.342783	Cells
FBXL15	-0.237496	1	Cells
LIN7B	-0.23753	3.97067e-09	Cells
UBL5	-0.237566	5.55193e-25	Cells
STOM	-0.237572	1	Cells
SYNGR2	-0.237894	2.4685e-10	Cells
LINC01405	-0.237941	1.30204e-56	Cells
RPL5	-0.238355	1.21481e-48	Cells
MYH7	-0.238604	4.92419e-279	Cells
AC068700.1	-0.239382	0.0246751	Cells
CZIB	-0.23945	1	Cells
MGAT4B	-0.239511	1	Cells
HAX1	-0.239644	4.73882e-09	Cells
ACOX1	-0.239725	0.0559353	Cells
RTRAF	-0.239845	2.20759e-09	Cells
GSTZ1	-0.240077	0.351278	Cells
EID1	-0.240389	1.20236e-13	Cells
NORAD	-0.240394	8.25728e-23	Cells
RPS15A	-0.240692	2.73397e-111	Cells
SHMT2	-0.241148	1	Cells
NAA20	-0.241291	1	Cells
CPSF1	-0.241485	1	Cells
SLC25A4	-0.241704	2.20508e-57	Cells
SLC25A11	-0.241783	1.05022e-15	Cells
PPP1R16A	-0.241811	1.406e-14	Cells
RPS25	-0.241836	5.82858e-100	Cells
POLR2I	-0.242077	1.45553e-23	Cells
RP9	-0.242183	8.75434e-06	Cells
AC018521.5	-0.242257	6.69595e-07	Cells
AQP4	-0.242323	1.13214e-17	Cells
BZW2	-0.242503	2.63249e-15	Cells
MRPL46	-0.242581	0.000823554	Cells
NUDT22	-0.242698	1	Cells
TUBB4B	-0.242701	1.2284e-06	Cells
CELSR2	-0.242907	1	Cells
NOP10	-0.242955	5.19697e-12	Cells
CDKN1B	-0.242962	3.65773e-08	Cells
MAP2K1	-0.243265	8.51531e-05	Cells
AHCY	-0.243611	0.596185	Cells
C10orf143	-0.243807	1	Cells
ARPC5L	-0.243838	1.43274e-05	Cells
RAB9A	-0.243928	1	Cells
SNHG7	-0.244206	5.24498e-11	Cells
TPRA1	-0.244277	1	Cells
COX5A	-0.244516	6.43205e-59	Cells
ZFPM1	-0.244601	0.000928143	Cells
CHCHD1	-0.244974	1.4655e-06	Cells
SLC25A3	-0.245081	3.11986e-44	Cells
PPID	-0.245131	0.00790465	Cells
RPSA	-0.24514	5.9424e-40	Cells
MYL12A	-0.246361	2.02315e-64	Cells
SUCLG1	-0.246366	5.38239e-13	Cells
TSTD1	-0.246476	1	Cells
TST	-0.246895	1	Cells
FASTKD5	-0.247024	1	Cells
ACOT8	-0.247297	1	Cells
RELA	-0.248687	0.886273	Cells
SNU13	-0.248759	3.1911e-16	Cells
PNPLA4	-0.248917	0.144084	Cells
PITPNA-AS1	-0.248985	1	Cells
DDA1	-0.24917	1	Cells
GOT1	-0.249844	2.938e-22	Cells
SNHG6	-0.249998	4.77754e-33	Cells
DBT	-0.250232	1	Cells
ITGAE	-0.25066	0.199068	Cells
BCL7B	-0.250793	0.00437251	Cells
H3F3A	-0.250846	1.17747e-29	Cells
UQCR10	-0.251084	1.07975e-56	Cells
PPP2CA	-0.251544	1.25436e-06	Cells
C6orf120	-0.252231	1	Cells
ABCE1	-0.252539	0.0491492	Cells
TMEM222	-0.252589	1	Cells
CCNI	-0.252819	2.92553e-19	Cells
OBSCN-AS1	-0.25304	1	Cells
MRFAP1	-0.253044	1.91485e-14	Cells
RPS4X	-0.253068	6.6706e-65	Cells
UBE2Q1	-0.253751	1	Cells
POMGNT2	-0.254054	1	Cells
DBNDD2	-0.254168	6.855e-12	Cells
PPP1R7	-0.254436	0.00620349	Cells
PRUNE1	-0.254922	0.0238116	Cells
RNASEH2C	-0.255462	1	Cells
FYTTD1	-0.255677	2.93932e-14	Cells
EIF4A1	-0.255837	1	Cells
SRF	-0.256195	0.00070526	Cells
ATP5PO	-0.256201	2.11316e-48	Cells
ATP5F1A	-0.256791	2.38631e-45	Cells
PRKAR1A	-0.257311	1.91094e-13	Cells
HINT3	-0.257826	4.91139e-09	Cells
CA2	-0.258035	0.001606	Cells
TTN-AS1	-0.258685	3.32905e-132	Cells
RPL36A	-0.2588	5.84821e-52	Cells
CAT	-0.258838	0.00155253	Cells
RPL36AL	-0.259224	5.53164e-45	Cells
LAMTOR1	-0.259324	4.80258e-05	Cells
MRPS22	-0.26013	0.00170303	Cells
DNAJC24	-0.260195	1	Cells
NDRG1	-0.260216	1	Cells
SRP9	-0.260244	1.5288e-11	Cells
RPL23A	-0.260616	2.89532e-59	Cells
PRADC1	-0.260981	0.0304892	Cells
OXA1L	-0.261092	2.71269e-06	Cells
NDUFB2	-0.262082	8.64044e-61	Cells
RPL17	-0.262159	4.13314e-45	Cells
LSMEM1	-0.262463	1	Cells
TMEM147	-0.262476	0.0907121	Cells
RRAGA	-0.262528	0.00112361	Cells
SCYL3	-0.262605	1	Cells
ENDOD1	-0.262876	1.04873e-08	Cells
NDUFS3	-0.262948	5.61411e-15	Cells
RPS13	-0.262964	4.4411e-114	Cells
EIF3F	-0.263105	2.35625e-22	Cells
MTMR9	-0.263165	1	Cells
BLVRA	-0.263287	0.00430222	Cells
RPS3	-0.263484	7.19706e-68	Cells
TXNDC17	-0.263644	0.00270067	Cells
PIGP	-0.263907	0.00708116	Cells
ANXA2	-0.264061	1	Cells
ACO2	-0.264187	8.96471e-23	Cells
SMIM19	-0.264398	1.72807e-05	Cells
SATB1	-0.264793	8.95429e-09	Cells
AMOT	-0.264817	1.50097e-10	Cells
NDUFB6	-0.265077	1.04807e-22	Cells
MAGED2	-0.265108	0.0627967	Cells
MRPL43	-0.26623	9.86875e-09	Cells
COL1A2	-0.266358	1.89834e-05	Cells
MB	-0.266494	7.89465e-213	Cells
SERBP1	-0.266789	1.17984e-38	Cells
COA3	-0.266824	1.09363e-08	Cells
PHAX	-0.267114	0.302127	Cells
MYL1	-0.267202	1.72385e-236	Cells
RGS10	-0.267543	0.326511	Cells
ATPAF2	-0.267735	1	Cells
NKIRAS1	-0.268266	1	Cells
MVB12A	-0.268529	1	Cells
SLC25A46	-0.26888	1.12459e-07	Cells
LSM1	-0.269012	1	Cells
EIF3A	-0.269231	8.77442e-29	Cells
TMSB4X	-0.269528	1.45166e-06	Cells
TMEM14C	-0.269626	5.49476e-07	Cells
HSPB6	-0.270762	2.11024e-52	Cells
ICMT	-0.270851	0.125358	Cells
FDX2	-0.270899	1	Cells
DDIT4	-0.271931	0.00039746	Cells
NDUFA2	-0.272232	7.95411e-27	Cells
[truncated: 2,645 more rows]

## Sheet: Sup.Table4
gene	avg_log2FC	p_val_adj	cluster
HIST2H2AC	2.76167	0.000147444	Filtered
HBB	2.0827	3.50976e-200	Filtered
LINC01405	1.8981	1.46215e-199	Filtered
COX17	1.73584	6.04216e-08	Filtered
HIST1H4C	1.66666	1	Filtered
HIST1H1E	1.64931	1	Filtered
RPL23	1.64735	4.74899e-42	Filtered
AL451062.1	1.63349	6.81133e-35	Filtered
NDUFA1	1.59094	4.28841e-50	Filtered
TMSB4X	1.58399	0.713366	Filtered
COMMD6	1.58097	1	Filtered
ATP5F1E	1.56548	3.48375e-140	Filtered
RPL39	1.53527	0	Filtered
COX6C	1.5349	2.52707e-69	Filtered
COX7B	1.52549	7.95343e-92	Filtered
RPL38	1.50962	0	Filtered
RPL36A	1.50327	3.53223e-68	Filtered
COX7A1	1.50134	0	Filtered
COX6A2	1.47798	0	Filtered
UQCRQ	1.4716	8.08674e-115	Filtered
ATP5MD	1.47067	1.0436e-34	Filtered
RPL26	1.46003	1.19997e-207	Filtered
RPS28	1.45885	0	Filtered
NDUFA4	1.45295	1.21365e-213	Filtered
RPS21	1.45258	1.25275e-302	Filtered
RPL36AL	1.44515	0.247836	Filtered
RPL37A	1.43851	0	Filtered
RPL35A	1.43056	1.42792e-110	Filtered
COX8A	1.39325	2.36912e-56	Filtered
RPL36	1.38851	4.21239e-110	Filtered
RPS24	1.38769	0	Filtered
NDUFB3	1.38527	0.0320125	Filtered
COX7C	1.38375	2.83922e-266	Filtered
ELOB	1.38209	5.10215e-27	Filtered
RPS26	1.38205	1.27061e-159	Filtered
MTLN	1.37712	9.42806e-54	Filtered
POLR2I	1.3684	1	Filtered
ATP5MPL	1.36363	7.81559e-05	Filtered
RPL31	1.36229	2.30577e-25	Filtered
UQCR10	1.35726	1.32238e-48	Filtered
RPS20	1.35601	9.69497e-48	Filtered
RPL37	1.35493	0	Filtered
ROMO1	1.35154	1	Filtered
OST4	1.34726	1	Filtered
UQCR11	1.34704	1.82544e-159	Filtered
NDUFA3	1.33865	0.00182427	Filtered
RPS27	1.33672	0	Filtered
POLR2L	1.32909	0.000452397	Filtered
NDUFS5	1.32735	1.31144e-17	Filtered
RPL41	1.32376	0	Filtered
NDUFB2	1.317	6.82314e-29	Filtered
ATP5IF1	1.30035	1.06484e-09	Filtered
RPS25	1.2999	0	Filtered
ATP5ME	1.29211	4.94872e-15	Filtered
RPS27A	1.29061	2.01703e-70	Filtered
RPS23	1.28762	0	Filtered
MT-ATP8	1.28066	5.87839e-45	Filtered
RPL27A	1.28	1.46655e-63	Filtered
FAU	1.27414	1.64612e-111	Filtered
RPL34	1.27175	4.82657e-151	Filtered
STRIT1	1.26465	3.12822e-31	Filtered
RPLP1	1.26055	0	Filtered
TOMM7	1.25795	8.13671e-153	Filtered
RPL12	1.24569	1.69474e-156	Filtered
GNG5	1.2446	1	Filtered
MT2A	1.24347	1	Filtered
ATP5PF	1.2384	3.39857e-14	Filtered
ATP5MG	1.23212	5.81354e-09	Filtered
NDUFB11	1.22398	3.87773e-10	Filtered
MT1X	1.20991	3.12676e-15	Filtered
RPLP2	1.20388	1.50783e-105	Filtered
RPS12	1.20146	1.08783e-250	Filtered
NDUFB4	1.19628	0.049313	Filtered
COX6B1	1.19571	3.84002e-34	Filtered
UBA52	1.18477	2.66868e-67	Filtered
UQCRB	1.18135	3.71778e-114	Filtered
MRPL41	1.17722	1	Filtered
SNHG6	1.16179	0.00205278	Filtered
RPS15	1.16042	9.26916e-207	Filtered
RPL30	1.15493	2.54972e-293	Filtered
LGALS1	1.15472	3.30455e-07	Filtered
RPS15A	1.15157	0	Filtered
RPL24	1.15155	2.62359e-49	Filtered
RPL28	1.14358	3.34052e-59	Filtered
YEATS4	1.13678	1	Filtered
KRTCAP2	1.13101	1	Filtered
MRPS36	1.12768	1	Filtered
RPS11	1.12576	2.04176e-22	Filtered
RPL35	1.12461	1.67587e-156	Filtered
AL627171.2	1.12081	1.09978e-07	Filtered
RPS8	1.12005	2.6682e-189	Filtered
KIF22	1.1121	1	Filtered
TAF13	1.10185	1	Filtered
ATP5PD	1.09831	1	Filtered
RPL27	1.09711	6.19956e-65	Filtered
COX5B	1.08217	1.55757e-99	Filtered
RPL32	1.08189	1.52417e-292	Filtered
RPS29	1.07509	8.93481e-164	Filtered
SNHG8	1.06541	1	Filtered
CACYBP	1.0646	1	Filtered
DNAJB9	1.05724	1	Filtered
RPS16	1.05247	1.63825e-76	Filtered
RPS18	1.04199	4.84085e-216	Filtered
SNRPG	1.03904	1	Filtered
SMIM4	1.03374	0.0372571	Filtered
HSPE1	1.03288	1	Filtered
RPS13	1.03217	8.7775e-201	Filtered
TMSB10	1.02113	1	Filtered
PET100	1.02093	0.0688186	Filtered
RPS14	1.01461	1.55351e-87	Filtered
MRPL17	1.01224	1	Filtered
C15orf61	1.00301	1	Filtered
GHITM	1.00232	1	Filtered
NDUFA13	0.995502	0.22268	Filtered
COX14	0.993702	0.0431231	Filtered
RPS19	0.993399	5.09706e-48	Filtered
SNHG5	0.989482	0.0443053	Filtered
RPL17	0.987308	1	Filtered
AC010642.2	0.984442	1	Filtered
NOP10	0.982756	1	Filtered
PDCD5	0.98126	0.283171	Filtered
NDUFV3	0.975811	1	Filtered
ATP5PB	0.972324	0.0106237	Filtered
RPL23A	0.972107	4.26548e-68	Filtered
RBIS	0.969715	0.620548	Filtered
RPS7	0.94612	1.13224e-07	Filtered
TNNC1	0.945121	0	Filtered
ZSCAN16-AS1	0.943511	0.0571564	Filtered
CHURC1	0.941587	0.0536592	Filtered
AC073896.2	0.939494	0.0103177	Filtered
NDUFB7	0.938671	1	Filtered
CHCHD1	0.932496	1	Filtered
DPM3	0.930371	1	Filtered
IARS2	0.929223	0.599174	Filtered
RPL13A	0.928388	7.93319e-120	Filtered
MRPL36	0.92448	1	Filtered
IER3IP1	0.9234	1	Filtered
MRPS18C	0.919614	1	Filtered
TMEM126A	0.909963	1	Filtered
RPL26L1	0.9085	1	Filtered
NSA2	0.906965	5.59018e-07	Filtered
COX4I1	0.903944	5.69547e-15	Filtered
ZNF622	0.903726	1	Filtered
S100A1	0.90298	0.0312874	Filtered
MDH1	0.902124	1	Filtered
MRLN	0.898167	1.92215e-06	Filtered
RPL7	0.895015	0.209677	Filtered
CFL2	0.889787	1	Filtered
TRAPPC2B	0.888361	1	Filtered
GFER	0.886502	1	Filtered
MICOS13	0.885708	1	Filtered
SBDS	0.883468	1	Filtered
AL162231.1	0.883035	1	Filtered
AL096870.8	0.880647	1	Filtered
RNF7	0.877538	1	Filtered
LAMTOR2	0.877482	1	Filtered
SMIM30	0.877196	0.0106225	Filtered
MESP1	0.875981	1	Filtered
PYURF	0.872633	1	Filtered
MYL2	0.870627	0	Filtered
FAM162A	0.869753	0.284372	Filtered
COA4	0.868491	1	Filtered
SRP14	0.867998	1	Filtered
NDUFB9	0.86754	2.59751e-06	Filtered
LAMTOR5	0.863564	1	Filtered
MRPL51	0.863555	1	Filtered
HIGD1A	0.863235	0.0125892	Filtered
H2AFZ	0.861664	0.0499791	Filtered
ANAPC11	0.860318	1	Filtered
COX5A	0.860315	0.00455723	Filtered
TP53TG1	0.859143	1	Filtered
EEF1B2	0.858883	6.09249e-34	Filtered
USE1	0.856588	1	Filtered
RPP21	0.855688	1	Filtered
MICOS10	0.854248	0.613453	Filtered
TCP1	0.85344	0.016446	Filtered
NOL7	0.851292	0.946465	Filtered
CA3	0.850503	3.08085e-143	Filtered
NUDCD2	0.842435	1	Filtered
SEPHS2	0.840963	1	Filtered
PLN	0.840564	1	Filtered
GRPEL1	0.840014	1	Filtered
DDT	0.836888	0.0281152	Filtered
RPL18	0.8328	0.000940831	Filtered
SF3B5	0.830621	1	Filtered
DBI	0.829633	1	Filtered
LAMTOR4	0.824805	0.0896363	Filtered
NDUFAF4	0.824401	1	Filtered
VBP1	0.821977	1	Filtered
BAG1	0.820535	0.0422494	Filtered
NDUFS6	0.819514	1	Filtered
ARMCX1	0.818757	1	Filtered
FXYD1	0.81687	0.491995	Filtered
MZT2B	0.815199	1	Filtered
RPL22	0.81408	0.000506836	Filtered
RSL24D1	0.812855	0.0847584	Filtered
ATP5MC2	0.811724	0.000478722	Filtered
SPTY2D1OS	0.81165	1	Filtered
CMAS	0.810315	1	Filtered
GTF2H5	0.809922	1.68638e-06	Filtered
BNIP3	0.808217	1	Filtered
UXT	0.807779	1	Filtered
FTH1	0.807432	4.54703e-144	Filtered
RCN2	0.806606	1	Filtered
NDUFB10	0.805373	0.0122008	Filtered
SMDT1	0.804069	0.00637887	Filtered
RELA-DT	0.802027	1	Filtered
GABARAPL2	0.797365	0.302281	Filtered
RPL11	0.794763	2.08595e-10	Filtered
RPS3A	0.79189	2.30702e-46	Filtered
SMIM19	0.791086	1	Filtered
IPO5	0.791084	4.58849e-07	Filtered
MYL12A	0.789879	9.15872e-17	Filtered
SNRPD1	0.788951	0.880138	Filtered
TAF9	0.786716	1	Filtered
MRPL34	0.786387	0.551648	Filtered
CBX3	0.783178	0.00229835	Filtered
LSM7	0.780961	1	Filtered
RBX1	0.779636	0.000405576	Filtered
RPL13	0.778771	1.1989e-171	Filtered
RPL21	0.778085	1.00605e-45	Filtered
NDUFAB1	0.777093	0.00601716	Filtered
TPT1	0.776363	0	Filtered
MORF4L1	0.775216	1.75263e-07	Filtered
SSR4	0.771898	1	Filtered
TOMM6	0.769249	0.361194	Filtered
FH	0.765006	0.000425186	Filtered
CIAO2B	0.761666	0.650755	Filtered
HTATSF1	0.760984	0.534451	Filtered
NUDT8	0.760543	1	Filtered
DPH3	0.760341	0.287539	Filtered
CISD3	0.759376	0.139974	Filtered
CISD1	0.758072	8.04705e-06	Filtered
SMIM27	0.75798	1	Filtered
TMEM160	0.75768	1	Filtered
EMC6	0.756939	0.175369	Filtered
NORAD	0.75654	0.00822839	Filtered
RNF181	0.756054	2.51354e-05	Filtered
PRR34-AS1	0.753678	4.36391e-07	Filtered
SELENOM	0.748862	1	Filtered
PPCS	0.748696	0.570398	Filtered
C4orf3	0.748668	0.915274	Filtered
IFIT1	0.747268	1	Filtered
C1QBP	0.746813	1	Filtered
MPC1	0.746213	1.61731e-05	Filtered
UQCRFS1	0.743844	1	Filtered
SNAPC5	0.743385	1	Filtered
HINT3	0.742877	1.72197e-05	Filtered
SMIM15	0.742383	1	Filtered
CHMP2B	0.741477	0.0158766	Filtered
CYCS	0.740322	0.00120533	Filtered
RPL19	0.739882	1.04495e-59	Filtered
MPC2	0.739855	3.91899e-05	Filtered
H3F3A	0.739199	4.16509e-05	Filtered
ELOC	0.737202	1.66071e-07	Filtered
TOMM22	0.736808	1	Filtered
COA3	0.736262	0.212416	Filtered
BZW1	0.735918	0.759496	Filtered
HSPB3	0.735715	0.000498238	Filtered
THOC7	0.733085	0.0365817	Filtered
RPS27L	0.732254	5.72701e-06	Filtered
MRPS14	0.731897	1	Filtered
TPRKB	0.731674	0.0649921	Filtered
FUNDC1	0.731317	1	Filtered
AKIRIN1	0.728457	0.592142	Filtered
SELENOS	0.728209	0.00630174	Filtered
RABAC1	0.726947	1	Filtered
PAM16	0.726896	6.60307e-07	Filtered
RPL10A	0.726342	1	Filtered
KLHL18	0.726156	2.48834e-08	Filtered
RPL10	0.726063	8.84639e-107	Filtered
GTF3C6	0.724405	0.00209105	Filtered
DYNLL2	0.72429	0.191639	Filtered
SMPX	0.724041	0.0122171	Filtered
CCDC47	0.722422	5.89987e-08	Filtered
HSBP1	0.721577	0.000672221	Filtered
SLC25A4	0.721093	5.65178e-13	Filtered
CCNQ	0.720844	1	Filtered
MZT1	0.717911	1	Filtered
ARPC5L	0.71769	1	Filtered
RWDD1	0.716177	0.000225954	Filtered
SEM1	0.715695	1.90155e-06	Filtered
GLRX5	0.714586	0.0261594	Filtered
ANP32E	0.714566	1	Filtered
LMAN2	0.713615	1	Filtered
GTF2A2	0.712935	1	Filtered
RNASEK	0.712722	0.0416135	Filtered
SMIM10L1	0.712151	0.00921871	Filtered
MTMR6	0.711968	1	Filtered
POMP	0.711094	1.41616e-08	Filtered
TRAPPC5	0.710455	0.0085679	Filtered
UFC1	0.710392	1	Filtered
PNPLA4	0.710017	0.773006	Filtered
SLBP	0.709765	1	Filtered
EIF4EBP3	0.709258	1	Filtered
FGD5-AS1	0.708908	0.00581309	Filtered
ISCU	0.707964	6.39471e-05	Filtered
MRPL11	0.706096	0.103493	Filtered
PRDX3	0.70521	7.41759e-06	Filtered
EIF1AY	0.704289	1.04563e-08	Filtered
DMAC2L	0.703833	0.0226106	Filtered
SF3B6	0.703793	0.857944	Filtered
RPS5	0.702372	7.67702e-08	Filtered
GAS5	0.701503	0.0309516	Filtered
SELENOK	0.701165	0.00221642	Filtered
FDX1	0.700997	0.942439	Filtered
ATP5F1A	0.700584	1	Filtered
FKBP3	0.699857	3.64857e-15	Filtered
FAM200B	0.699781	1	Filtered
METTL5	0.697846	0.118495	Filtered
KRT10	0.697164	0.00140208	Filtered
HSPA5	0.694931	0.000815574	Filtered
MIR4458HG	0.694045	1	Filtered
MRPL20	0.691415	2.53026e-08	Filtered
TMEM14C	0.688954	0.000662436	Filtered
GCLM	0.68826	0.0192482	Filtered
RPL14	0.688204	5.08921e-12	Filtered
BLOC1S1	0.687025	3.2644e-10	Filtered
C12orf73	0.686887	0.0804185	Filtered
TMED2	0.686054	0.609321	Filtered
TPM3	0.684136	1.90655e-148	Filtered
COX16	0.683793	1.08011e-06	Filtered
JPT1	0.682648	1	Filtered
MGST3	0.681912	4.24688e-11	Filtered
HNRNPAB	0.679181	0.00261344	Filtered
BBIP1	0.678612	1	Filtered
ZNF593	0.678187	0.0876187	Filtered
ANGPTL1	0.677382	1	Filtered
TCEAL1	0.675601	1	Filtered
RPL18A	0.675289	1.76311e-75	Filtered
SCOC	0.674853	1	Filtered
ATP6V1F	0.674355	0.00307979	Filtered
OSGIN2	0.672817	1	Filtered
CDC26	0.670099	1	Filtered
MRPL16	0.669995	0.629743	Filtered
MED7	0.667795	1	Filtered
MRPL14	0.664791	2.33836e-07	Filtered
TIMM13	0.664079	7.46865e-05	Filtered
CANX	0.663651	0.00014574	Filtered
EIF2S2	0.663649	2.23637e-11	Filtered
NINJ1	0.663208	1	Filtered
MRPL58	0.662567	0.000108645	Filtered
MYH7	0.660462	0	Filtered
RPL6	0.65876	1	Filtered
PDHB	0.658248	0.00177388	Filtered
NPM1	0.655816	6.49581e-07	Filtered
COX20	0.655771	0.0734615	Filtered
PHYH	0.655724	9.05356e-15	Filtered
NDUFAF3	0.655479	0.0490942	Filtered
TST	0.655125	0.00645205	Filtered
TMED7	0.654792	0.921523	Filtered
GSTO1	0.654214	0.506456	Filtered
SPCS3	0.653041	1	Filtered
MRPL27	0.652506	3.47524e-05	Filtered
PPP1R14B	0.652479	0.00147315	Filtered
AP2S1	0.651762	0.0248991	Filtered
ZBTB18	0.651679	2.36533e-05	Filtered
PPP1CC	0.650685	1.52554e-07	Filtered
MRPL40	0.647993	3.42798e-05	Filtered
PCBD1	0.647796	0.0154954	Filtered
GPN3	0.64747	1	Filtered
DCTPP1	0.646193	1	Filtered
ISCA1	0.645558	4.66064e-05	Filtered
PSMD7	0.64535	3.34036e-15	Filtered
MRPS21	0.642984	0.110409	Filtered
GATM	0.642227	8.16216e-11	Filtered
C17orf49	0.642057	1	Filtered
CYP51A1	0.641564	1	Filtered
CHCHD10	0.640966	4.47976e-21	Filtered
AKR1C2	0.640849	1	Filtered
MRPL46	0.640838	1	Filtered
RDH14	0.640355	1	Filtered
PRNP	0.639873	0.00422946	Filtered
CDV3	0.63835	0.000874532	Filtered
ALKBH7	0.636398	3.31664e-05	Filtered
SUMO3	0.63639	6.44407e-05	Filtered
CRYAB	0.635549	2.76907e-49	Filtered
SRP9	0.635116	4.33715e-08	Filtered
PSMA4	0.63438	2.87874e-13	Filtered
HADHB	0.634212	1.0632e-11	Filtered
GLRX2	0.634183	1	Filtered
FAM229B	0.633646	1	Filtered
RBBP7	0.632882	6.73312e-07	Filtered
AK3	0.630282	1.75653e-10	Filtered
RPP25L	0.627818	0.0171877	Filtered
RTRAF	0.627556	4.63413e-08	Filtered
ETHE1	0.626037	0.048142	Filtered
VDAC2	0.625363	1.32602e-05	Filtered
PSMA7	0.625361	2.17524e-09	Filtered
DNAJA2	0.624651	0.00444122	Filtered
SKP1	0.62448	3.03513e-13	Filtered
LACTB	0.624428	1	Filtered
PSMA6	0.62348	1.07884e-08	Filtered
RPS6	0.621755	0.367875	Filtered
LMOD2	0.61998	1	Filtered
RPL7A	0.618259	1.27425e-09	Filtered
APEH	0.618087	2.39377e-07	Filtered
HSD17B10	0.618013	1	Filtered
SPRYD7	0.616724	0.000133376	Filtered
CUTA	0.616355	7.29927e-06	Filtered
ETFB	0.615329	2.04279e-09	Filtered
TDP2	0.61344	0.193641	Filtered
RPL29	0.612073	1.16218e-66	Filtered
EIF3K	0.611873	0.000101409	Filtered
ZNF181	0.61092	0.0156945	Filtered
ATOX1	0.61069	0.012725	Filtered
TIMM21	0.610546	0.0532725	Filtered
POLE4	0.610413	0.0411834	Filtered
PPP1R16A	0.609618	6.42134e-08	Filtered
RPS4X	0.609103	1	Filtered
PXMP2	0.609067	0.621192	Filtered
EIF1B	0.608066	0.0826599	Filtered
ENY2	0.607838	0.000351711	Filtered
SMIM20	0.607709	0.531845	Filtered
SERBP1	0.606694	5.78387e-17	Filtered
GABARAP	0.606277	1.67173e-05	Filtered
CWC15	0.605308	2.65333e-05	Filtered
MYL1	0.604602	1.3503e-271	Filtered
MT-CO1	0.602409	0	Filtered
RPL9	0.601362	1	Filtered
SGSM1	0.600638	1	Filtered
TIMM10	0.600498	0.586185	Filtered
MRPS15	0.599246	4.43164e-08	Filtered
EIF1AX	0.59864	3.8945e-09	Filtered
GLO1	0.598183	7.07062e-12	Filtered
HINT2	0.597815	0.0944046	Filtered
ARL1	0.597358	0.00250089	Filtered
DNAJB4	0.597248	1.49278e-07	Filtered
POLR2J	0.595581	1.32102e-09	Filtered
NDUFV2	0.59521	1.08236e-11	Filtered
URB1-AS1	0.595047	1	Filtered
PSMB6	0.594624	8.58853e-10	Filtered
PPDPF	0.594497	0.000667143	Filtered
CSTB	0.594419	1	Filtered
HSP90AA1	0.593941	4.33514e-07	Filtered
SLN	0.593275	8.08998e-119	Filtered
YWHAB	0.592705	2.67757e-07	Filtered
HSPA9	0.592359	4.2781e-10	Filtered
SNHG19	0.59156	1	Filtered
ECHS1	0.591388	2.33288e-07	Filtered
PCBP1	0.591293	2.10776e-11	Filtered
SOD1	0.590833	3.84626e-05	Filtered
PPDPFL	0.590194	6.76502e-07	Filtered
METTL26	0.589198	0.00021383	Filtered
AMZ2	0.589157	0.670328	Filtered
NDUFS8	0.587918	1.05621e-08	Filtered
EMC7	0.587356	0.0047356	Filtered
SIVA1	0.587278	3.39975e-12	Filtered
ATP6V1G1	0.586823	1	Filtered
DNTTIP2	0.586098	0.00150316	Filtered
GPX4	0.585327	3.10771e-08	Filtered
FUCA1	0.585321	1	Filtered
VAMP5	0.585156	6.91625e-06	Filtered
HNRNPH2	0.584306	1	Filtered
RPS9	0.583898	0.00839028	Filtered
CCT4	0.582963	4.9364e-06	Filtered
CDKN1B	0.582711	1.0298e-05	Filtered
PPP1CB	0.581708	2.39214e-18	Filtered
HSPD1	0.581247	3.76916e-07	Filtered
ENDOG	0.580754	2.3342e-05	Filtered
CDKN1C	0.579869	1	Filtered
TAF7	0.579042	1.24275e-13	Filtered
MRFAP1	0.579034	7.35385e-06	Filtered
TMX4	0.57814	5.84611e-09	Filtered
ATP5F1D	0.576603	2.14735e-19	Filtered
WDR83OS	0.576586	0.000171214	Filtered
MRPS24	0.576482	4.93538e-06	Filtered
TSPYL1	0.576194	2.43636e-10	Filtered
FAAP20	0.575604	0.00374436	Filtered
GLTP	0.575445	0.139156	Filtered
MOAP1	0.575115	1	Filtered
SYF2	0.575073	0.00138328	Filtered
ATP5F1B	0.573967	0.140855	Filtered
KIF1BP	0.573271	1.11825e-05	Filtered
MYL6B	0.573198	1	Filtered
TMEM167A	0.573146	1	Filtered
REEP5	0.571682	1.02307e-11	Filtered
CBX1	0.571604	0.0457076	Filtered
YBX3	0.571372	4.23494e-82	Filtered
BTF3	0.570936	5.83493e-06	Filtered
SLC35B1	0.570933	0.00384137	Filtered
CNBP	0.570725	5.81809e-07	Filtered
NDUFS7	0.569723	4.39925e-07	Filtered
FAM136A	0.568339	1	Filtered
TNNI1	0.567874	6.32811e-160	Filtered
LGALSL	0.566205	1	Filtered
ATP5F1C	0.566004	2.21836e-15	Filtered
CHRAC1	0.565718	0.0134944	Filtered
ZCRB1	0.565594	1.65006e-05	Filtered
NDUFA5	0.565281	1.89515e-11	Filtered
EIF4A2	0.565076	8.26068e-21	Filtered
EIF2S1	0.564932	9.6719e-05	Filtered
FABP3	0.564648	0.00273929	Filtered
EIF1	0.564379	4.62252e-08	Filtered
ECI2	0.564317	2.24453e-13	Filtered
PDCD2	0.563582	1	Filtered
SUB1	0.562861	1.29871e-10	Filtered
PSMC1	0.561672	3.78407e-15	Filtered
CDKN2AIPNL	0.561122	9.23504e-05	Filtered
MYL3	0.560602	1.98019e-32	Filtered
FHL1	0.560179	5.03667e-100	Filtered
GSTP1	0.559045	1.00178e-10	Filtered
EID1	0.557306	5.61795e-07	Filtered
DEXI	0.557212	9.23973e-08	Filtered
GGCT	0.557126	0.649366	Filtered
MAT2B	0.5571	0.0138661	Filtered
PIN4	0.556971	0.000343386	Filtered
TRIM52-AS1	0.556807	0.0125662	Filtered
DLD	0.55643	3.75731e-09	Filtered
TARS	0.556295	0.00967163	Filtered
RPSA	0.555706	0.000814967	Filtered
EIF5A	0.555089	9.44268e-10	Filtered
MRPL2	0.554309	0.000831739	Filtered
HERPUD1	0.55352	3.02219e-08	Filtered
SUCLA2	0.553519	3.09523e-12	Filtered
MRPS22	0.553453	0.000196565	Filtered
NHP2	0.552787	3.06113e-08	Filtered
SSR3	0.552151	0.11092	Filtered
RPS2	0.551314	4.65557e-15	Filtered
GOLGA7	0.551209	0.0260226	Filtered
LYSMD2	0.550572	1	Filtered
ADI1	0.548275	6.97659e-11	Filtered
SERINC1	0.546401	1.93721e-12	Filtered
ETFA	0.54573	6.60788e-15	Filtered
RFXANK	0.545584	0.000139259	Filtered
SELENOP	0.544463	5.43849e-09	Filtered
SRSF8	0.544442	1	Filtered
DDX1	0.544412	1.19064e-18	Filtered
KLHL34	0.544355	1	Filtered
FAM210B	0.544061	0.000292772	Filtered
TCAP	0.544028	2.76805e-148	Filtered
MT-ND4	0.543206	1.96371e-261	Filtered
ST13	0.542992	8.79878e-18	Filtered
FITM1	0.541057	7.63418e-06	Filtered
MAP1LC3B	0.541027	1.44635e-08	Filtered
PRADC1	0.539346	0.0260207	Filtered
MT-ND3	0.538056	1.80023e-167	Filtered
CAMLG	0.537267	0.000454796	Filtered
TMEM159	0.536617	0.001107	Filtered
TMF1	0.536202	0.00482771	Filtered
DCTN3	0.535782	0.000169383	Filtered
PAIP1	0.535445	7.15825e-10	Filtered
PARK7	0.535385	9.06708e-13	Filtered
AKR1B1	0.53468	1.31719e-16	Filtered
BX284668.5	0.53468	1	Filtered
MSRB2	0.534676	8.97663e-12	Filtered
TNNI3	0.534192	1	Filtered
EIF3J	0.534089	9.53464e-23	Filtered
MRGBP	0.533979	1	Filtered
PRSS56	0.53304	1	Filtered
PFDN2	0.533028	7.04637e-08	Filtered
GIHCG	0.532659	1	Filtered
CDC37L1	0.532529	1.33881e-08	Filtered
NUTF2	0.531867	0.000137846	Filtered
BLVRB	0.530732	2.04852e-11	Filtered
SLC25A3	0.530607	0.0430773	Filtered
ANXA5	0.529975	0.000353571	Filtered
DAD1	0.529369	2.84588e-08	Filtered
PDCL3	0.528074	0.593116	Filtered
RNF141	0.52756	0.00054505	Filtered
MYL12B	0.527205	9.66631e-09	Filtered
ACAT1	0.527188	1.38296e-22	Filtered
THAP11	0.526985	0.936932	Filtered
CTNNAL1	0.526982	1	Filtered
DUT	0.52695	6.76398e-09	Filtered
SNRPB2	0.52664	0.0129149	Filtered
HPRT1	0.52512	1	Filtered
NEDD8	0.524538	6.2433e-12	Filtered
TRAPPC2L	0.523945	9.72951e-06	Filtered
DNAJC21	0.523657	3.94278e-09	Filtered
PRDX2	0.523338	5.23067e-09	Filtered
BROX	0.521858	0.128189	Filtered
PFDN6	0.521737	1	Filtered
GDE1	0.521498	0.0359016	Filtered
IDI1	0.521429	1.25248e-15	Filtered
ANAPC13	0.521417	0.00988744	Filtered
PPP1R2	0.521043	3.40855e-19	Filtered
AURKAIP1	0.520449	1.98561e-10	Filtered
MT-ND2	0.519167	3.38193e-122	Filtered
ZNF32	0.519117	0.000896436	Filtered
ATXN7L3B	0.519043	0.000133813	Filtered
KIF5B	0.518465	4.46689e-15	Filtered
CMC2	0.518441	2.59883e-05	Filtered
CHMP2A	0.518428	2.38872e-05	Filtered
STBD1	0.518374	2.84029e-15	Filtered
SPCS1	0.518311	0.000174927	Filtered
CD63	0.517584	1.01249e-09	Filtered
NDN	0.517503	0.733785	Filtered
LEO1	0.517412	0.000272818	Filtered
NOLC1	0.517144	0.00217984	Filtered
RAB5IF	0.515809	0.000270732	Filtered
ARPC3	0.5156	0.933519	Filtered
VDAC3	0.514466	2.19837e-24	Filtered
MRPS34	0.514444	6.43024e-05	Filtered
COPS4	0.514102	6.21981e-06	Filtered
RPS3	0.514086	1	Filtered
NAXE	0.513225	0.101781	Filtered
MYH2	0.513048	0	Filtered
ZNF614	0.513015	1	Filtered
GTF2B	0.512743	0.0332508	Filtered
NOL11	0.511932	4.82632e-06	Filtered
SURF1	0.511646	6.04281e-05	Filtered
PRKAB2	0.511126	8.45482e-09	Filtered
DRAP1	0.510836	0.000659939	Filtered
PSMD10	0.510741	1	Filtered
EIF3A	0.510293	1.27705e-20	Filtered
PLA2G12A	0.508474	5.15136e-07	Filtered
MYL5	0.508039	0.00109357	Filtered
MRPS35	0.507999	9.934e-07	Filtered
KLHDC2	0.506572	4.80201e-09	Filtered
C12orf45	0.506206	1	Filtered
TRPT1	0.505652	2.26593e-12	Filtered
RRP15	0.505592	2.63855e-08	Filtered
DUSP28	0.505193	1.76625e-05	Filtered
MCFD2	0.505121	8.36082e-08	Filtered
POLR2K	0.50391	1	Filtered
SEPTIN10	0.50386	0.000990131	Filtered
EMC9	0.502971	7.95969e-08	Filtered
MMADHC	0.502476	1.64857e-11	Filtered
IL32	0.502363	0.000284649	Filtered
APRT	0.501856	1	Filtered
CAPZA2	0.501638	3.66203e-27	Filtered
TOMM20	0.501016	4.33187e-15	Filtered
ECH1	0.500758	2.02759e-16	Filtered
RAN	0.499874	3.4371e-07	Filtered
RRS1	0.499381	1	Filtered
GNAS	0.499148	0.0146462	Filtered
TNNT1	0.497757	9.73776e-194	Filtered
HCFC1R1	0.497015	4.66457e-08	Filtered
LINC01003	0.495805	1	Filtered
NGRN	0.495719	1.71158e-12	Filtered
CCT5	0.495393	2.22822e-06	Filtered
MT-ND1	0.494549	6.77993e-189	Filtered
TALDO1	0.49436	1.34677e-05	Filtered
RPL8	0.494303	0.00135612	Filtered
C5orf24	0.492872	4.00963e-07	Filtered
FUNDC2	0.492605	2.17149e-16	Filtered
SSB	0.491771	2.41139e-06	Filtered
H1F0	0.489776	2.15115e-06	Filtered
ACADM	0.488522	6.33807e-21	Filtered
CCDC107	0.48778	0.0159243	Filtered
DNAJC8	0.486874	5.7903e-05	Filtered
MTFR1L	0.486808	2.64378e-13	Filtered
PRDX1	0.48663	2.15688e-10	Filtered
LMO2	0.486212	0.246231	Filtered
OTUD6B-AS1	0.485653	0.00364133	Filtered
BECN1	0.485136	1.04034e-05	Filtered
ADSSL1	0.484844	2.05353e-05	Filtered
PBDC1	0.482895	1	Filtered
MRPL43	0.482673	1.81194e-08	Filtered
SNRPC	0.48185	7.25669e-09	Filtered
COPZ1	0.480893	0.00104577	Filtered
PEBP1	0.479875	2.48056e-16	Filtered
AL136038.5	0.478228	1	Filtered
ACP1	0.478132	0.000113091	Filtered
NDUFS1	0.477837	1.60298e-23	Filtered
CALM1	0.477408	3.57832e-14	Filtered
GET4	0.476721	1	Filtered
PRXL2A	0.476685	5.03208e-09	Filtered
ABCE1	0.475996	0.208156	Filtered
COMMD2	0.475721	0.429998	Filtered
MT-CO3	0.475363	8.24789e-204	Filtered
PIGP	0.47484	1	Filtered
RNF11	0.473762	1.11591e-18	Filtered
ZNF511	0.473475	0.00259654	Filtered
KLHL41	0.473365	1.60802e-41	Filtered
PRDX6	0.473195	8.50041e-17	Filtered
SELENOW	0.472985	7.49267e-15	Filtered
PSMD12	0.470041	7.80653e-18	Filtered
SSBP1	0.469926	4.70555e-13	Filtered
MED10	0.469364	0.328441	Filtered
DHRS7	0.468409	1.89449e-10	Filtered
PSMB5	0.466847	1.04894e-10	Filtered
SNX3	0.466106	4.09228e-13	Filtered
TIPRL	0.466046	1	Filtered
ZNF330	0.465963	2.52655e-05	Filtered
MALSU1	0.465653	9.25205e-16	Filtered
THAP5	0.465358	0.162535	Filtered
NDUFB5	0.46533	2.27266e-15	Filtered
DDX24	0.465317	2.15096e-19	Filtered
UGP2	0.465087	9.9442e-23	Filtered
AHSA1	0.465086	1.42797e-07	Filtered
POLR2F	0.465027	1.89617e-06	Filtered
THAP12	0.46387	0.408673	Filtered
PEX19	0.463823	1.61486e-07	Filtered
RAB4A	0.463421	1.33394e-07	Filtered
CIAO2A	0.463287	8.83768e-09	Filtered
SNHG7	0.46257	0.103145	Filtered
ATPAF1	0.462559	2.13258e-14	Filtered
PA2G4	0.461967	8.62354e-15	Filtered
PNRC2	0.461168	0.0725265	Filtered
SEC61B	0.460827	0.00242622	Filtered
NIPSNAP3B	0.460514	2.44224e-05	Filtered
MRPS18B	0.460402	1.39924e-12	Filtered
PDK4	0.460052	0.344848	Filtered
MRPL12	0.459855	1.03305e-07	Filtered
HSP90AB1	0.459454	0.0582672	Filtered
KIAA1143	0.459331	0.00155088	Filtered
GSDMC	0.459172	1	Filtered
POLR2G	0.459011	1	Filtered
SOD2	0.458908	1.18188e-17	Filtered
TMEM134	0.458456	1	Filtered
TRMT6	0.457849	1	Filtered
MYLPF	0.457598	1.48376e-222	Filtered
FIS1	0.456187	1.00078e-11	Filtered
DLAT	0.455637	2.33705e-16	Filtered
MTRF1L	0.455331	0.00190203	Filtered
ILF2	0.454948	0.645358	Filtered
ANAPC15	0.454279	0.000327036	Filtered
HOXA10	0.453498	1.75647e-05	Filtered
GUK1	0.452912	0.000945511	Filtered
GTPBP8	0.452212	0.00775061	Filtered
NDUFS3	0.451826	1.32249e-09	Filtered
DSTN	0.451816	8.71398e-07	Filtered
PDHA1	0.451323	2.69199e-18	Filtered
ADO	0.451175	1	Filtered
SWI5	0.450438	0.778801	Filtered
PSMA2	0.449528	1.29915e-08	Filtered
GPNMB	0.449494	1	Filtered
EXOSC1	0.448943	1	Filtered
UQCRC1	0.448894	1.79939e-25	Filtered
PLAAT3	0.448813	1.55913e-11	Filtered
PWWP3B	0.447882	4.7302e-05	Filtered
STOML2	0.447646	4.14205e-08	Filtered
HCCS	0.44708	0.00628832	Filtered
COPS7A	0.446013	0.000138133	Filtered
LRIF1	0.445743	0.00286376	Filtered
ALAS1	0.445026	0.00383562	Filtered
PSMD6	0.444985	6.39643e-08	Filtered
DCN	0.444544	0.0705389	Filtered
LSM4	0.444215	0.000664251	Filtered
NDUFS4	0.444171	1.49556e-30	Filtered
ALYREF	0.443779	1	Filtered
LACTB2	0.443704	0.620047	Filtered
ZNF770	0.443653	1.75263e-06	Filtered
NDUFA8	0.442457	9.7919e-15	Filtered
UBL7	0.442181	0.0183475	Filtered
COPS2	0.441768	9.25407e-10	Filtered
ITGAE	0.441439	0.0008915	Filtered
ICAM3	0.440362	1	Filtered
PSMD2	0.439966	2.93706e-23	Filtered
IFRD2	0.43987	0.0108775	Filtered
CCDC90B	0.439497	5.82147e-07	Filtered
ANTKMT	0.437227	0.422519	Filtered
CA2	0.437222	2.90879e-06	Filtered
SCAND1	0.436735	6.81635e-08	Filtered
EIF3F	0.436658	1.28475e-19	Filtered
ATP6V0C	0.435153	5.27551e-17	Filtered
MORN2	0.435042	1	Filtered
REX1BD	0.434837	4.37766e-19	Filtered
PDAP1	0.434235	3.01532e-09	Filtered
TRMT10C	0.434151	0.0723074	Filtered
PPA1	0.433799	0.00182579	Filtered
NUDT14	0.433707	0.00823816	Filtered
MB	0.433229	1.54725e-128	Filtered
RWDD2B	0.433109	2.59711e-06	Filtered
ENPP4	0.432728	0.209067	Filtered
NIFK	0.432588	1	Filtered
ZMAT2	0.431776	1.41944e-09	Filtered
TRAPPC6A	0.430932	1	Filtered
PFDN4	0.430925	4.33025e-06	Filtered
ISCA2	0.429455	0.0493924	Filtered
SSR2	0.428293	0.00344116	Filtered
EIF5	0.427982	1.14199e-22	Filtered
ZNRD2	0.42778	1	Filtered
TMEM106B	0.427717	1.92513e-18	Filtered
AC022706.1	0.427463	0.53735	Filtered
C1D	0.426376	1.26793e-11	Filtered
PSMA5	0.426345	1.13634e-10	Filtered
GABPB1-IT1	0.424587	0.117452	Filtered
ATRAID	0.423741	3.43908e-09	Filtered
UBE2D1	0.423306	2.56034e-23	Filtered
GADD45GIP1	0.422927	1.64133e-13	Filtered
AC036176.1	0.422817	1	Filtered
CST3	0.422797	7.51712e-16	Filtered
BRI3	0.422626	1.23939e-18	Filtered
COA5	0.422242	3.97e-17	Filtered
GFM1	0.421814	3.83739e-13	Filtered
RRAGA	0.421039	0.000174434	Filtered
NCOA4	0.4198	1.29576e-10	Filtered
WSB2	0.419719	2.43009e-05	Filtered
FAM76A	0.419291	0.000587671	Filtered
C18orf32	0.418892	3.418e-05	Filtered
ACY1	0.417094	1	Filtered
PPIA	0.416966	2.31775e-05	Filtered
HSPB6	0.41689	0.0673769	Filtered
C22orf39	0.416883	6.50778e-06	Filtered
RPL5	0.416751	0.000182362	Filtered
TP53RK	0.416482	1	Filtered
MT-ND4L	0.41519	1.35297e-87	Filtered
CCT2	0.415077	2.39025e-05	Filtered
TACO1	0.414933	0.000184111	Filtered
NARS	0.414716	2.34972e-10	Filtered
BPGM	0.413673	0.101745	Filtered
DEK	0.413622	2.77804e-26	Filtered
FAM98B	0.412824	0.185754	Filtered
SNRNP27	0.412522	4.19365e-17	Filtered
SMNDC1	0.41245	0.00107781	Filtered
SURF2	0.412286	1	Filtered
HADHA	0.412204	2.24346e-19	Filtered
GTF3C4	0.411452	0.630083	Filtered
RPS4Y1	0.410535	7.84706e-11	Filtered
SNRPA	0.409623	1	Filtered
NUDT6	0.408948	1	Filtered
TMEM141	0.407331	0.600824	Filtered
ZDHHC4	0.406873	0.00677136	Filtered
SUPT4H1	0.40681	0.625589	Filtered
MT-CYB	0.406444	7.13438e-114	Filtered
SEC11C	0.405892	0.208301	Filtered
G0S2	0.405883	5.73934e-12	Filtered
DANCR	0.405806	0.0215478	Filtered
H2AFJ	0.405315	0.450571	Filtered
METTL9	0.405082	5.3211e-11	Filtered
FTL	0.405016	7.25254e-16	Filtered
SNU13	0.404121	6.37574e-12	Filtered
PEA15	0.404099	1	Filtered
AIP	0.403571	0.511716	Filtered
MZT2A	0.403554	0.00466246	Filtered
IMPACT	0.402642	0.153107	Filtered
POLR1E	0.402166	1	Filtered
RPF2	0.401972	6.33003e-06	Filtered
HSPH1	0.401849	3.63223e-08	Filtered
MCM4	0.40176	1	Filtered
SNAP29	0.401705	0.00584426	Filtered
CYC1	0.40169	5.68018e-18	Filtered
SLC25A46	0.401548	3.46791e-11	Filtered
PRDX5	0.400977	1.43198e-14	Filtered
ITM2B	0.400541	1.56734e-21	Filtered
RAB13	0.400202	1	Filtered
TARSL2	0.400018	2.14225e-13	Filtered
CENPX	0.399996	0.0595965	Filtered
GOT1	0.398964	9.03022e-29	Filtered
EIF1AD	0.397994	1	Filtered
TUSC2	0.39735	0.00175063	Filtered
RIOK1	0.39519	1	Filtered
SARAF	0.394797	9.40144e-07	Filtered
FYTTD1	0.394072	1.91832e-14	Filtered
UBC	0.393351	8.89935e-15	Filtered
IDH3B	0.393197	6.20812e-15	Filtered
METTL21A	0.393193	1	Filtered
ATMIN	0.39294	0.125421	Filtered
EIF3M	0.392707	3.93881e-13	Filtered
EIF3B	0.392596	2.28992e-13	Filtered
IPO7	0.392494	2.81595e-21	Filtered
TMEM223	0.39208	1	Filtered
GRSF1	0.391662	7.03751e-26	Filtered
SELENOH	0.391186	4.87283e-11	Filtered
FAM3C	0.390585	0.029218	Filtered
HSPA14.1	0.390581	2.51295e-05	Filtered
TXNL4A	0.38973	2.09836e-12	Filtered
HSP90B1	0.38939	3.68716e-08	Filtered
SVBP	0.388872	0.0385484	Filtered
FIBP	0.388848	0.000212611	Filtered
EMC3	0.388013	2.11449e-20	Filtered
BTBD1	0.387811	1.45373e-21	Filtered
SCNM1	0.387304	2.7405e-11	Filtered
LIN7B	0.386714	9.26227e-07	Filtered
DENND10	0.386679	0.0026044	Filtered
CASQ2	0.386547	3.62506e-07	Filtered
DYNLL1	0.386521	2.38821e-05	Filtered
MRPL35	0.386337	0.00862542	Filtered
TCEAL4	0.386053	1.2679e-13	Filtered
ICMT	0.385366	0.00118979	Filtered
MSL3	0.385026	9.20371e-05	Filtered
SAP18	0.384821	7.66386e-11	Filtered
PIGH	0.384746	1	Filtered
BCKDK	0.38474	0.000649316	Filtered
TFAM	0.384058	1	Filtered
H3F3B	0.384051	4.68451e-19	Filtered
RP9	0.383496	1.02335e-05	Filtered
TIMM17A	0.383207	7.00645e-18	Filtered
COQ3	0.382817	0.00116966	Filtered
ZNHIT1	0.381941	4.32434e-09	Filtered
UBQLN2	0.381732	9.093e-08	Filtered
STRAP	0.3817	1.64905e-11	Filtered
HDDC2	0.380896	1.33576e-08	Filtered
SUGT1	0.380331	6.79224e-15	Filtered
TUFM	0.380196	5.48013e-11	Filtered
EDF1	0.379812	8.48542e-14	Filtered
LYRM7	0.379802	3.17563e-10	Filtered
PDLIM1	0.379627	2.50502e-06	Filtered
GFPT1	0.37957	0.00112993	Filtered
RILP	0.379207	1.08081e-10	Filtered
SLC25A11	0.379127	7.92292e-21	Filtered
ACBD5	0.377839	0.000422906	Filtered
TMEM18	0.377648	0.000122374	Filtered
LRPPRC	0.3773	2.03915e-22	Filtered
BRK1	0.376676	0.0244016	Filtered
HPF1	0.376518	0.262614	Filtered
MYOZ2	0.376488	6.76369e-06	Filtered
SERPING1	0.376357	1	Filtered
BEX3	0.375365	1	Filtered
JTB	0.375196	6.11001e-14	Filtered
C4orf54	0.374706	2.71487e-23	Filtered
ATP6V0B	0.373641	3.81053e-19	Filtered
KRR1	0.373037	4.30642e-13	Filtered
PPIC	0.371695	0.0125828	Filtered
LMOD3	0.371588	1.0239e-31	Filtered
BMI1	0.370701	0.00171249	Filtered
CAVIN4	0.369978	2.76621e-21	Filtered
PDLIM2	0.368934	0.000268572	Filtered
NEPRO	0.368904	0.000300447	Filtered
C1orf122	0.36875	2.2944e-05	Filtered
SH3GLB1	0.368645	7.76759e-32	Filtered
ADH5	0.368243	0.00123016	Filtered
VEGFB	0.368086	2.35783e-16	Filtered
ETFRF1	0.368075	2.51155e-09	Filtered
BNIP2	0.366449	1.28996e-10	Filtered
MT-ND5	0.365892	1.88347e-69	Filtered
NCL	0.36553	1.51361e-19	Filtered
ADIRF	0.365218	1	Filtered
GSTM3	0.364915	0.00012437	Filtered
LSM10	0.364777	7.24958e-11	Filtered
TSN	0.364763	1.15063e-08	Filtered
ZNF518B	0.364688	0.87563	Filtered
UTP15	0.364191	0.00345436	Filtered
TMEM99	0.364146	0.0380429	Filtered
RRM2B	0.363645	2.05655e-05	Filtered
BUD23	0.362296	6.93946e-06	Filtered
C11orf74	0.362016	2.06285e-05	Filtered
HEXIM1	0.361972	0.00574068	Filtered
MDH2	0.361622	9.76e-16	Filtered
VTI1B	0.361181	5.21226e-08	Filtered
PSMC6	0.360748	4.2857e-10	Filtered
CDK2AP1	0.360527	0.000872952	Filtered
PHF10	0.359955	2.68659e-19	Filtered
TRMT112	0.359532	4.41618e-08	Filtered
HSPA4	0.359213	1.41905e-05	Filtered
ASF1A	0.358896	0.0729676	Filtered
IFNAR1	0.358738	2.28507e-12	Filtered
MAPRE1	0.358297	0.0144139	Filtered
YWHAH	0.357223	0.00469499	Filtered
SMARCA5	0.357083	1.31185e-11	Filtered
OXLD1	0.356789	0.700215	Filtered
POLR1D	0.356422	6.06654e-15	Filtered
CCT8	0.356267	1.07208e-11	Filtered
NAMPT	0.35617	1.50484e-14	Filtered
HSPB1	0.356161	0.000171523	Filtered
ITGB1BP1	0.356037	0.00496672	Filtered
ARMT1	0.355361	0.00134572	Filtered
MAPKAPK5-AS1	0.354975	0.0043605	Filtered
POLR3GL	0.354931	5.85325e-07	Filtered
C5orf15	0.354275	0.0110235	Filtered
TAF10	0.35388	9.5269e-09	Filtered
DNPH1	0.353867	1.55559e-09	Filtered
SATB1	0.353427	3.17657e-19	Filtered
MRPL54	0.353363	4.47594e-07	Filtered
DENR	0.35299	3.83422e-05	Filtered
AAMDC	0.352698	4.29536e-38	Filtered
COMMD3	0.35253	0.000324266	Filtered
TNNC2	0.352438	3.02373e-150	Filtered
PXMP4	0.352123	1	Filtered
GOT2	0.351947	3.2536e-29	Filtered
TOMM70	0.351641	4.40911e-20	Filtered
MED11	0.351624	1	Filtered
ZNF395	0.350711	1	Filtered
PRDX4	0.350649	1	Filtered
RAMAC	0.350242	0.409801	Filtered
RPAIN	0.349714	1.77883e-09	Filtered
PKIA	0.349208	7.28076e-27	Filtered
MED8	0.349154	0.542773	Filtered
BHLHE41	0.34757	2.95326e-18	Filtered
TTC1	0.346943	6.98352e-16	Filtered
RIOK3	0.346645	7.61518e-21	Filtered
OPTN	0.345403	1.03101e-26	Filtered
MOCS2	0.344729	2.09003e-13	Filtered
DYNC1LI1	0.343833	4.20933e-09	Filtered
HMBS	0.343774	0.0443609	Filtered
AC100810.1	0.343613	1	Filtered
RMDN1	0.343382	2.3082e-05	Filtered
SDHB	0.343218	1.17455e-23	Filtered
RNF139	0.343164	0.0594043	Filtered
DHRS7C	0.342647	6.5048e-23	Filtered
ANKRD35	0.341769	1	Filtered
SEC62	0.341681	1.33585e-20	Filtered
DBNDD2	0.340811	4.50498e-14	Filtered
APIP	0.340556	1.61728e-12	Filtered
DYNLT1	0.339734	8.6702e-08	Filtered
COMTD1	0.339725	0.00251584	Filtered
EIF3H	0.339507	2.15401e-28	Filtered
CSTF2T	0.339402	0.00170388	Filtered
TCEA3	0.339137	7.08279e-24	Filtered
APOO	0.338324	0.00101369	Filtered
OAZ1	0.337836	4.88715e-19	Filtered
PSMC5	0.337493	5.51776e-16	Filtered
NIPSNAP2	0.337186	2.23097e-42	Filtered
FAM207A	0.336683	0.00257816	Filtered
KARS	0.336279	1.18267e-11	Filtered
MFN2	0.336036	5.55515e-28	Filtered
ARL6IP5	0.335904	1.56743e-30	Filtered
NABP2	0.335286	1	Filtered
CAVIN3	0.334565	1	Filtered
PNRC1	0.333932	1.08704e-20	Filtered
COPS3	0.333525	1.78246e-23	Filtered
DDB1	0.333494	2.41157e-18	Filtered
MT-ATP6	0.333424	5.71038e-91	Filtered
USP16	0.333329	3.05619e-18	Filtered
NAP1L1	0.33284	1.88497e-25	Filtered
RSL1D1	0.332369	1.2087e-13	Filtered
TPM2	0.332344	1.81466e-103	Filtered
ZFAS1	0.332278	1.06758e-05	Filtered
CLPP	0.332273	2.73611e-10	Filtered
NES	0.331943	0.547309	Filtered
BRF2	0.330647	0.00645619	Filtered
CCDC127	0.330273	0.000426286	Filtered
SYAP1	0.329316	7.51039e-10	Filtered
MRPL18	0.329061	4.01845e-06	Filtered
RPS19BP1	0.32848	1.74154e-11	Filtered
TOB1	0.328332	4.36024e-23	Filtered
DMRT2	0.328123	0.0823765	Filtered
AL118516.1	0.328101	1	Filtered
PAIP2	0.327586	1.14702e-27	Filtered
ACAA2	0.327405	1	Filtered
ALDH6A1	0.327272	4.19141e-11	Filtered
SHISA2	0.326288	0.000132413	Filtered
ACTN2	0.326231	3.82161e-15	Filtered
FAM122A	0.325161	1	Filtered
POLD4	0.324792	3.20776e-09	Filtered
LAPTM4A	0.324594	5.51457e-12	Filtered
IMPDH2	0.324403	3.821e-14	Filtered
AIMP1	0.324277	4.50243e-16	Filtered
ESD	0.324173	2.19025e-17	Filtered
CFL1	0.324156	1.767e-09	Filtered
NUCKS1	0.323636	1.18615e-38	Filtered
HSPA2	0.323604	1.98538e-06	Filtered
SPTSSA	0.323563	0.0347678	Filtered
C9orf78	0.323534	0.00146625	Filtered
GEMIN7	0.323278	1	Filtered
LINP1	0.322509	0.0558036	Filtered
WBP11	0.322387	0.000342978	Filtered
ODC1	0.322106	1.60889e-07	Filtered
CENPV	0.32175	7.00889e-05	Filtered
LARP7	0.321225	1.87355e-12	Filtered
VIM	0.320796	1	Filtered
PLIN2	0.320111	4.42742e-17	Filtered
TRIR	0.319595	4.8458e-13	Filtered
ASNSD1	0.319142	9.76973e-05	Filtered
DHRS4L2	0.318464	0.000990998	Filtered
METAP2	0.318304	2.2993e-30	Filtered
BZW2	0.318269	1.75452e-26	Filtered
RBM7	0.317423	0.0302737	Filtered
LYRM2	0.317197	6.71998e-06	Filtered
MRPL4	0.317072	7.13514e-10	Filtered
DNAJC15	0.316837	1.31037e-18	Filtered
MRPL44	0.316831	0.12224	Filtered
HAUS6	0.316771	0.0111272	Filtered
EIF2A	0.316538	2.94388e-10	Filtered
AL137246.2	0.316498	8.39543e-08	Filtered
NDUFB8	0.315569	7.29478e-30	Filtered
MT-CO2	0.315305	7.29895e-81	Filtered
PNPO	0.315283	0.604397	Filtered
PNKD	0.314644	6.89758e-10	Filtered
FAM174A	0.312808	9.649e-06	Filtered
FAM98A	0.312646	1.04899e-07	Filtered
DHX40	0.312267	1.05226e-06	Filtered
TSEN15	0.31226	3.39808e-17	Filtered
TMOD4	0.312052	2.1549e-25	Filtered
LDHA	0.311869	0.185976	Filtered
UTP11	0.311779	1.13071e-33	Filtered
CUL2	0.311245	2.3799e-14	Filtered
EIF4G2	0.309049	1.06232e-41	Filtered
MMGT1	0.309049	0.0252734	Filtered
BLOC1S2	0.308599	0.800264	Filtered
TIMM17B	0.308043	6.06544e-11	Filtered
PSMC2	0.307336	7.55827e-14	Filtered
HSD17B12	0.306928	1.43504e-05	Filtered
RANGRF	0.306751	1	Filtered
ARF5	0.306546	2.31912e-05	Filtered
ERLEC1	0.305853	2.23977e-07	Filtered
TNIP2	0.30551	1	Filtered
HNRNPA0	0.305087	1.29668e-08	Filtered
MRPL30	0.304897	0.000188671	Filtered
SRP19	0.304859	2.59283e-08	Filtered
LSM2	0.304005	1	Filtered
CCT6A	0.303852	4.6181e-17	Filtered
SERAC1	0.303564	0.0512785	Filtered
EMC4	0.302775	2.48027e-09	Filtered
AKTIP	0.302455	9.75889e-14	Filtered
VPS4A	0.301475	1.00475e-08	Filtered
FXR1	0.301	3.3253e-40	Filtered
DNAJA3	0.300868	5.17903e-14	Filtered
FAM76B	0.300781	0.0440195	Filtered
TM2D2	0.300384	1	Filtered
XIRP2	0.300336	2.43466e-37	Filtered
MRPS7	0.299898	5.43718e-16	Filtered
GSPT1	0.299853	6.11849e-23	Filtered
GSTZ1	0.299784	1.24236e-05	Filtered
SMCO1	0.298562	2.1257e-15	Filtered
PSMB3	0.298561	9.83492e-17	Filtered
PHB2	0.297871	2.07377e-19	Filtered
MYOT	0.297829	1	Filtered
ZNF688	0.29758	0.0131104	Filtered
MTCH2	0.296652	3.89907e-13	Filtered
UBXN1	0.296574	5.68845e-18	Filtered
ATP2A1-AS1	0.296332	8.75539e-07	Filtered
SPX	0.295274	1	Filtered
YIPF3	0.295138	8.67635e-08	Filtered
TFG	0.294994	2.54533e-11	Filtered
CIPC	0.294696	1.00886e-28	Filtered
MRPL32	0.293646	2.08592e-06	Filtered
ENO1	0.293612	5.93065e-11	Filtered
ALDH1A1	0.293358	3.69845e-08	Filtered
SRM	0.29321	2.60579e-08	Filtered
EIF4E3	0.293067	5.19888e-13	Filtered
NET1	0.292723	7.10011e-05	Filtered
ATP2A2	0.292716	3.53542e-36	Filtered
NTAN1	0.292674	0.295433	Filtered
CEBPZ	0.292526	3.2268e-13	Filtered
MRPL47	0.292241	1.74096e-07	Filtered
PDP1	0.291836	3.08846e-14	Filtered
CNIH4	0.291419	7.63741e-05	Filtered
FBL	0.291152	3.21038e-07	Filtered
CYB5R1	0.290513	3.22537e-30	Filtered
UBL4A	0.289973	4.81709e-07	Filtered
PSMD8	0.289921	1.42123e-29	Filtered
CRYL1	0.289713	2.14749e-06	Filtered
TSC22D4	0.289623	0.00731635	Filtered
SNRNP25	0.289007	1.61464e-06	Filtered
TMEM9B	0.288271	0.00532541	Filtered
ALDH5A1	0.287916	4.76513e-08	Filtered
DGCR6L	0.287224	1.14739e-08	Filtered
SLC25A38	0.286989	0.00130137	Filtered
AC007114.1	0.286381	0.132344	Filtered
PSMB4	0.285978	3.96861e-18	Filtered
ARL6IP4	0.285819	2.75055e-34	Filtered
TPMT	0.285217	0.0179748	Filtered
DCTN6	0.284831	1	Filtered
ANP32B	0.284285	9.49129e-11	Filtered
RNF5	0.284181	0.00215398	Filtered
PDIA6	0.283984	0.000166482	Filtered
AC010226.1	0.282899	2.14046e-05	Filtered
TPM1	0.282476	9.4788e-100	Filtered
C12orf10	0.281998	0.69974	Filtered
TFB2M	0.281908	0.000199617	Filtered
TIMMDC1	0.281713	9.28918e-14	Filtered
MRPL24	0.281629	4.69888e-06	Filtered
ACTR6	0.281345	1	Filtered
CNIH1	0.28126	7.65387e-06	Filtered
CCNDBP1	0.280325	0.000248063	Filtered
MSANTD4	0.280115	0.0205794	Filtered
PSMB1	0.280066	3.41994e-34	Filtered
PINK1	0.279852	2.81557e-28	Filtered
SGCB	0.279313	1.40947e-39	Filtered
PHYHD1	0.279234	1	Filtered
CCDC28B	0.279146	5.59718e-20	Filtered
HDAC2	0.279101	3.81885e-15	Filtered
SLITRK4	0.278873	0.0033538	Filtered
SLC2A8	0.277753	0.00454954	Filtered
DYNLRB1	0.277706	2.40784e-16	Filtered
NTPCR	0.276737	5.8375e-18	Filtered
ETF1	0.276347	1.75101e-15	Filtered
NFU1	0.276319	8.68791e-16	Filtered
MRPS12	0.274682	6.33093e-07	Filtered
YIF1A	0.273998	0.00273889	Filtered
PFN2	0.273957	3.08749e-20	Filtered
UBE2M	0.273945	3.55622e-10	Filtered
TSR2	0.273813	1	Filtered
PPIB	0.273355	1	Filtered
IDH2	0.273057	3.29048e-27	Filtered
RGS10	0.272443	2.02408e-05	Filtered
CKLF	0.272392	1	Filtered
GUF1	0.272006	7.73082e-12	Filtered
ADRM1	0.271949	1.15878e-10	Filtered
MCRIP2	0.271912	9.20513e-17	Filtered
TMEM203	0.271805	1	Filtered
COPS8	0.271754	5.62518e-18	Filtered
POLR3D	0.271605	0.083055	Filtered
STIP1	0.271327	4.31942e-15	Filtered
ARPC5	0.270939	1	Filtered
RMND5A	0.270808	5.31318e-33	Filtered
SYNJ2BP	0.270486	2.87397e-08	Filtered
NOSIP	0.270383	4.5086e-36	Filtered
AKT1S1	0.269811	3.534e-07	Filtered
RPA2	0.269163	1.64325e-09	Filtered
HSDL2	0.269051	1.03716e-30	Filtered
FAM210A	0.268894	3.60919e-15	Filtered
NUDC	0.268402	2.06624e-22	Filtered
CINP	0.267187	0.00449194	Filtered
STAT1	0.266571	0.000122001	Filtered
FECH	0.266229	6.67527e-07	Filtered
HSPB2	0.266116	7.56695e-21	Filtered
EIF4A3	0.265376	1.54773e-06	Filtered
EEF1D	0.265277	1.34758e-14	Filtered
EPRS	0.265194	1.30209e-21	Filtered
HIKESHI	0.264894	2.82635e-21	Filtered
POLR2B	0.264812	6.44912e-22	Filtered
KPNA4	0.264716	4.77899e-42	Filtered
UBLCP1	0.264205	1	Filtered
PGRMC2	0.263053	4.5209e-12	Filtered
BOD1	0.262514	1.96892e-12	Filtered
TMEM147	0.262486	6.02689e-05	Filtered
CTSH	0.261325	1	Filtered
RBM8A	0.261169	4.22705e-17	Filtered
RAD21	0.260871	2.44958e-20	Filtered
IFITM3	0.260587	1	Filtered
NCAPH2	0.260275	0.256665	Filtered
TMEM60	0.260144	1	Filtered
APOBEC2	0.260072	1.76454e-32	Filtered
NMRK2	0.259713	1.43138e-20	Filtered
METRN	0.259656	2.20385e-06	Filtered
PAFAH1B3	0.25924	0.251381	Filtered
PARP1	0.259058	1.37957e-20	Filtered
HSPA1A	0.258106	4.35703e-29	Filtered
TCEA1	0.257692	4.67142e-24	Filtered
PLEKHA3	0.257539	2.06719e-08	Filtered
ETFDH	0.257213	1.04301e-17	Filtered
CALU	0.257134	1.29976e-10	Filtered
CCDC43	0.256518	5.32931e-14	Filtered
HOXA7	0.256402	0.0378318	Filtered
NDUFS2	0.256249	4.70025e-42	Filtered
BOLA1	0.256171	1	Filtered
USP38	0.254812	1.44011e-18	Filtered
DAZAP2	0.25438	7.213e-07	Filtered
ARL2	0.253918	1.83685e-08	Filtered
SUCLG1	0.253376	1.86625e-29	Filtered
TXNDC5	0.252779	1	Filtered
SRI	0.252297	0.212058	Filtered
ACKR3	0.252208	1	Filtered
TIMM50	0.251747	1.41836e-07	Filtered
C14orf119	0.251731	1	Filtered
ANXA7	0.25086	4.32272e-28	Filtered
DDA1	0.250319	0.018576	Filtered
ACTA1	0.250117	1.11577e-55	Filtered
E2F8	0.249889	0.115626	Filtered
GYPC	0.249795	6.90235e-33	Filtered
ACSL4	0.24875	1	Filtered
FAM50B	0.248456	0.0195254	Filtered
YWHAG	0.247965	2.46983e-40	Filtered
RANBP1	0.247954	4.65997e-05	Filtered
FOXJ2	0.247877	5.34719e-07	Filtered
BORCS7	0.247568	2.98499e-11	Filtered
OMA1	0.247204	3.78111e-08	Filtered
NELFE	0.24712	1	Filtered
GPS1	0.247053	4.49446e-14	Filtered
SLC35B2	0.246878	0.0504501	Filtered
KANSL1-AS1	0.246799	1	Filtered
MYOZ1	0.246772	0.173732	Filtered
YWHAE	0.246565	1.87963e-54	Filtered
MRPL15	0.246308	2.32478e-21	Filtered
PGK1	0.245891	8.77773e-40	Filtered
ENO3	0.245782	6.61253e-58	Filtered
RACK1	0.245759	0.000295276	Filtered
SNAPIN	0.245726	1.23304e-10	Filtered
VAPA	0.245274	4.63226e-35	Filtered
NT5C3A	0.244886	7.6386e-16	Filtered
PDRG1	0.244708	0.165241	Filtered
DYNC1H1	0.244288	6.84556e-33	Filtered
ABRA	0.244245	3.72174e-25	Filtered
AIDA	0.244215	0.0166707	Filtered
H2AFV	0.244052	4.65047e-26	Filtered
ARF4	0.244046	1.75159e-05	Filtered
CHMP4B	0.243503	1.35826e-14	Filtered
TBCB	0.243139	0.892132	Filtered
KIAA1586	0.243114	1	Filtered
BANF1	0.242954	9.0718e-22	Filtered
ARL3	0.242342	0.0123356	Filtered
TBCC	0.24229	1	Filtered
HSF1	0.242272	7.62682e-32	Filtered
PLP2	0.241625	0.0119231	Filtered
NUPR1	0.241476	2.90625e-17	Filtered
ATIC	0.241329	0.00759825	Filtered
PSAP	0.241026	9.71245e-44	Filtered
PDHX	0.240571	7.6576e-31	Filtered
LYPLA1	0.240551	1.12277e-14	Filtered
FAM204A	0.240542	1.44648e-13	Filtered
HMGA1	0.239872	6.76323e-10	Filtered
NME6	0.239424	0.00173629	Filtered
MTIF3	0.23934	1.11095e-20	Filtered
RDX	0.239226	2.57731e-43	Filtered
C11orf58	0.239169	2.24199e-39	Filtered
TMEM219	0.238433	6.4719e-12	Filtered
MAD1L1	0.237964	2.15219e-39	Filtered
UNG	0.237338	1	Filtered
NDUFA9	0.237262	2.44362e-24	Filtered
THOC5	0.236158	0.000209708	Filtered
SRP54	0.236093	1.66986e-13	Filtered
MRPS30	0.235939	6.83895e-14	Filtered
PTGES3L	0.235791	1.65079e-10	Filtered
COX11	0.235117	2.85233e-14	Filtered
PRKAR1A	0.234282	2.30667e-22	Filtered
CCT3	0.233965	2.78569e-17	Filtered
PPIL1	0.233769	0.622525	Filtered
NUDT22	0.233519	1.70743e-05	Filtered
EBAG9	0.233229	2.74914e-11	Filtered
C16orf87	0.233088	8.85434e-12	Filtered
PIGS	0.232625	1	Filtered
ECI1	0.232286	8.30773e-32	Filtered
PSMD13	0.232146	5.17946e-18	Filtered
EXOSC4	0.232128	0.980655	Filtered
CTSF	0.231947	3.35494e-09	Filtered
CARNMT1	0.231791	2.83985e-06	Filtered
MRPS18A	0.231768	6.37092e-08	Filtered
CHMP3	0.231552	8.00207e-13	Filtered
C6orf120	0.231373	0.131953	Filtered
RHOC	0.230954	1	Filtered
ZFPM1	0.230744	1	Filtered
EIF3I	0.230528	1.47773e-13	Filtered
CCDC85B	0.229013	4.57546e-13	Filtered
LIG4	0.229004	5.35115e-05	Filtered
PTMA	0.228847	3.49144e-38	Filtered
TIMM22	0.228699	0.000193697	Filtered
SSNA1	0.228612	1.54874e-07	Filtered
TMEM120A	0.228249	0.840775	Filtered
PTGES3	0.227916	8.21244e-36	Filtered
PPP1R3C	0.227796	1.72297e-40	Filtered
UFSP2	0.226018	1.67218e-12	Filtered
BLVRA	0.226007	2.71457e-08	Filtered
ZNF106	0.225552	3.10324e-11	Filtered
XRCC5	0.224703	9.59462e-31	Filtered
MTIF2	0.224668	1.452e-08	Filtered
WDR46	0.224381	0.0293783	Filtered
MAP6D1	0.223994	3.93385e-10	Filtered
ZNF629	0.223975	0.775763	Filtered
TSPO	0.223788	0.039773	Filtered
CRAT	0.22329	2.43043e-17	Filtered
ATP6V1E1	0.221612	4.23422e-17	Filtered
TMEM263	0.221524	0.00600738	Filtered
NOC3L	0.221328	0.000902805	Filtered
AFG3L2	0.221043	1.3821e-40	Filtered
PSMA3	0.220462	4.6769e-18	Filtered
AQP4	0.220373	1.34222e-30	Filtered
CSDE1	0.219373	7.04915e-22	Filtered
HSBP1L1	0.219011	0.00283206	Filtered
SUMO2	0.218992	2.33877e-22	Filtered
ZNF639	0.218932	1.78725e-06	Filtered
GORASP2	0.218435	3.47621e-07	Filtered
SQSTM1	0.217856	1.75945e-51	Filtered
MRM2	0.217775	0.0618543	Filtered
NKAPD1	0.217535	0.0276282	Filtered
UROS	0.216263	2.54915e-11	Filtered
RHOA	0.215926	1.52659e-34	Filtered
TAX1BP1	0.215606	9.42853e-41	Filtered
TTC32	0.21512	1	Filtered
MRM3	0.214958	0.00925113	Filtered
MTURN	0.21454	0.017641	Filtered
MCAT	0.214314	0.146455	Filtered
LMO1	0.213763	6.73984e-08	Filtered
RHOD	0.213727	0.00364154	Filtered
TNFSF10	0.213509	1	Filtered
DCUN1D5	0.213455	1.41342e-12	Filtered
PGAM2	0.212914	9.41152e-11	Filtered
VPS29	0.212766	1.46611e-19	Filtered
PSMC3	0.212279	1.16161e-26	Filtered
POLE3	0.211719	0.00180164	Filtered
IFI27L1	0.211664	0.0943755	Filtered
IMMT	0.211602	4.24616e-32	Filtered
PTPN11	0.211564	1.06111e-25	Filtered
MRPS23	0.211458	8.56601e-13	Filtered
TMEM47	0.211081	8.54037e-06	Filtered
ARPP19	0.210641	7.89553e-42	Filtered
TMEM59	0.209961	5.85635e-21	Filtered
DYRK4	0.209738	1	Filtered
SLU7	0.20963	0.00334143	Filtered
THAP9	0.209548	0.000130405	Filtered
COQ2	0.208915	6.14948e-06	Filtered
IDI2-AS1	0.208756	0.110301	Filtered
SMS	0.208692	0.000159693	Filtered
RBMXL1	0.208211	0.0492268	Filtered
ZFPL1	0.208011	1	Filtered
DDX3Y	0.207735	1.09385e-08	Filtered
ZNRD1	0.206506	0.323938	Filtered
POLR3K	0.206317	0.404377	Filtered
TXNL1	0.206262	1.13458e-40	Filtered
SLC40A1	0.205874	5.1688e-05	Filtered
GSTK1	0.205458	2.10128e-25	Filtered
MRPL38	0.205356	1.76982e-19	Filtered
HOXC9	0.205222	2.13031e-07	Filtered
MPND	0.204789	0.0497233	Filtered
SDHAF4	0.204538	0.000948279	Filtered
VTA1	0.203889	1.71201e-14	Filtered
AGMAT	0.203274	1.32556e-23	Filtered
ZFAND5	0.203193	1.96575e-46	Filtered
IGIP	0.203054	0.0582302	Filtered
ERH	0.202817	0.0117635	Filtered
ZNHIT3	0.202254	2.06816e-12	Filtered
SNHG29	0.201749	1.38733e-11	Filtered
EIF3D	0.201742	1.86931e-08	Filtered
C2orf74	0.201679	0.0723065	Filtered
PRPS1	0.20153	0.001807	Filtered
PTGES2	0.200875	5.40174e-10	Filtered
GTF2A1	0.200762	2.59478e-07	Filtered
ERVK3-1	0.20064	5.13708e-09	Filtered
TSSC4	0.200627	0.00209362	Filtered
PDIA3	0.200303	5.89977e-10	Filtered
ACADSB	0.200125	2.46123e-10	Filtered
TMEM52	0.199989	5.0296e-40	Filtered
SYPL1	0.199245	1.25943e-33	Filtered
CDC5L	0.19922	2.53613e-20	Filtered
PDCD2L	0.199033	0.20554	Filtered
TRUB2	0.198944	2.55319e-06	Filtered
AP1AR	0.19804	0.188281	Filtered
LSM8	0.197407	2.08728e-12	Filtered
HES1	0.197225	1	Filtered
NFXL1	0.196621	9.36197e-05	Filtered
MRPS16	0.196427	1.63109e-09	Filtered
ZNF22	0.195948	0.733209	Filtered
DCTD	0.195559	0.540135	Filtered
PSMD4	0.19499	3.07379e-34	Filtered
MRPL55	0.194657	2.11132e-06	Filtered
IK	0.194617	3.1742e-09	Filtered
MORF4L2	0.194384	1.16323e-34	Filtered
HMGN4	0.193964	0.690224	Filtered
MYL6	0.19385	1.49463e-35	Filtered
ABCF2	0.193587	3.45751e-10	Filtered
PHAX	0.193053	0.000479642	Filtered
MID1IP1	0.192881	9.04072e-18	Filtered
AC024610.2	0.192839	9.16048e-09	Filtered
ATP23	0.192318	0.653876	Filtered
CLPX	0.192315	2.54031e-16	Filtered
TMEM9	0.191834	0.00119857	Filtered
GID4	0.191748	3.31552e-06	Filtered
TUBB4B	0.191689	1.35132e-20	Filtered
SERPINA5	0.191338	1	Filtered
TWF2	0.191174	3.88063e-27	Filtered
HSPA1B	0.19112	4.03979e-10	Filtered
FRG1	0.190828	1.30575e-07	Filtered
COPS6	0.190483	1.5454e-17	Filtered
TTN	0.190255	1.12389e-167	Filtered
PPIF	0.189892	1.71659e-10	Filtered
ATP6V0E1	0.188878	5.6946e-19	Filtered
EIF4B	0.188836	1.85668e-38	Filtered
LSM6	0.188716	0.000156066	Filtered
EEF1E1	0.188416	0.205858	Filtered
GRHPR	0.188366	2.64589e-15	Filtered
INTS12	0.188105	0.00049884	Filtered
RAB18	0.187773	8.6671e-13	Filtered
MRPL3	0.186868	1.31945e-16	Filtered
ADAM9	0.186594	1.36656e-10	Filtered
MPG	0.186542	4.14952e-19	Filtered
RAB21	0.186392	1.52406e-32	Filtered
ACAP1	0.186268	0.0207242	Filtered
FLII	0.186194	6.80235e-34	Filtered
TUBA4A	0.186007	7.25298e-44	Filtered
DNAJA1	0.185964	8.31251e-18	Filtered
PSMG4	0.185913	6.96183e-18	Filtered
TMED5	0.185772	2.51729e-18	Filtered
GLUD1	0.185755	0.000135231	Filtered
ING2	0.185731	1	Filtered
SMPD1	0.18544	2.28359e-10	Filtered
RTL8C	0.184006	6.94624e-12	Filtered
RRM1	0.183957	1.00646e-05	Filtered
PLPBP	0.182575	1.72617e-06	Filtered
FBXO3	0.182543	3.35136e-27	Filtered
PSMC4	0.182466	2.57403e-07	Filtered
RTN4	0.182279	7.33641e-57	Filtered
LIN7C	0.181982	0.000175471	Filtered
BX664615.2	0.181953	1	Filtered
LINC02762	0.181417	0.000217126	Filtered
KCTD9	0.181042	3.28491e-06	Filtered
TIMM29	0.180873	0.00864388	Filtered
MRPL9	0.180854	1.34502e-06	Filtered
SDHAF3	0.180788	1	Filtered
CALM3	0.180785	4.34393e-26	Filtered
PAF1	0.180662	2.13607e-07	Filtered
DDIT4L	0.180564	4.5071e-35	Filtered
PSMA1	0.180218	1.33623e-19	Filtered
SLC4A1AP	0.179989	2.11315e-07	Filtered
DTX3L	0.179969	1	Filtered
SRRD	0.179835	4.26655e-08	Filtered
PRPF4	0.179826	0.192872	Filtered
SDCBP	0.179244	0.0282856	Filtered
PPP1R11	0.17894	1	Filtered
TMEM109	0.1789	4.55369e-14	Filtered
ITGB1	0.178859	3.93971e-33	Filtered
TRMT1L	0.178706	2.12435e-14	Filtered
ACO2	0.178414	6.75174e-53	Filtered
MRPS10	0.178358	1.33131e-15	Filtered
RAB12	0.177062	7.98009e-38	Filtered
PABPC4	0.176948	9.90604e-55	Filtered
MMUT	0.176195	9.59325e-07	Filtered
SELENOT	0.175737	1.84331e-13	Filtered
C1orf131	0.175643	0.820626	Filtered
KCTD12	0.175519	1	Filtered
CPT2	0.175245	1	Filtered
L3MBTL2	0.17477	4.17877e-07	Filtered
RBM18	0.17444	2.17585e-12	Filtered
COQ8A	0.174363	1.17905e-33	Filtered
ALDH9A1	0.173949	1.49868e-18	Filtered
TXNDC9	0.173624	2.84146e-05	Filtered
LSMEM1	0.173292	3.72795e-26	Filtered
PPP1R27	0.173242	1.02983e-39	Filtered
DGCR6	0.172775	2.69647e-15	Filtered
HADH	0.172479	8.03404e-43	Filtered
NR2F6	0.172133	7.81485e-11	Filtered
DUSP3	0.171758	3.66015e-44	Filtered
MAGED2	0.171712	0.00252496	Filtered
TPI1	0.171711	4.8171e-08	Filtered
EIF5B	0.171684	1.63947e-38	Filtered
AL450998.2	0.171656	4.76425e-05	Filtered
AASDHPPT	0.171585	2.81869e-10	Filtered
SCAMP3	0.170866	1.6656e-09	Filtered
APEX1	0.170863	7.00583e-12	Filtered
TMEM11	0.170773	1.5559e-20	Filtered
STX4	0.170595	0.0355889	Filtered
NTMT1	0.170207	2.55155e-14	Filtered
ELOF1	0.169861	1	Filtered
ELK1	0.169689	1	Filtered
NBR1	0.168571	7.30771e-26	Filtered
CD320	0.168466	0.0155897	Filtered
PCMT1	0.168108	1.36782e-24	Filtered
SNRPD3	0.167505	1.22798e-12	Filtered
HLA-B	0.16749	0.544126	Filtered
PAIP2B	0.166744	1.66556e-13	Filtered
GYG1	0.166634	1.00092e-44	Filtered
HNRNPK	0.165986	3.20615e-49	Filtered
REST	0.165522	4.1641e-06	Filtered
C18orf21	0.165124	7.51073e-06	Filtered
DR1	0.165105	1.69128e-10	Filtered
GPT2	0.164752	2.516e-18	Filtered
CCT7	0.164413	1.20515e-20	Filtered
TRAPPC1	0.163735	4.60148e-11	Filtered
POPDC3	0.163407	9.81902e-26	Filtered
CCDC59	0.162949	4.75832e-13	Filtered
STUB1	0.161932	2.12757e-26	Filtered
POLR2C	0.161843	1.46125e-08	Filtered
CEBPG	0.161785	8.57383e-16	Filtered
SCP2	0.161611	7.48688e-39	Filtered
VPS28	0.161396	7.8141e-18	Filtered
NUDT4	0.161392	6.70179e-20	Filtered
AC078846.1	0.161335	1	Filtered
PRR13	0.161177	0.16564	Filtered
HMGN2	0.161044	5.63109e-36	Filtered
SLFN5	0.160415	9.8563e-12	Filtered
AP002360.1	0.160388	1	Filtered
LTV1	0.159401	0.000409755	Filtered
HDDC3	0.159328	1	Filtered
AK1	0.158999	4.11799e-08	Filtered
PGM1	0.158797	2.33554e-21	Filtered
USP13	0.158712	1.47774e-41	Filtered
CRNDE	0.158284	5.97513e-05	Filtered
PGD	0.158011	1	Filtered
WDFY3-AS2	0.158001	1	Filtered
HIST2H2BE	0.15796	1.68073e-05	Filtered
CHMP1B	0.157525	0.00114078	Filtered
HLA-A	0.156609	0.0812829	Filtered
ISOC2	0.156171	2.48063e-12	Filtered
MCM6	0.156114	0.0308423	Filtered
ALG3	0.155608	1	Filtered
DCAF6	0.155441	9.69492e-56	Filtered
ARMCX3	0.153774	0.00031138	Filtered
CAST	0.153285	4.61837e-53	Filtered
EIF2B5	0.152894	2.05286e-12	Filtered
GNL3	0.15279	1.95774e-10	Filtered
REXO2	0.152451	4.15784e-11	Filtered
SDHA	0.15184	7.65001e-56	Filtered
CTBS	0.151571	0.0429302	Filtered
HES6	0.15125	0.794718	Filtered
THYN1	0.151156	0.00186309	Filtered
IMP4	0.150547	1.79692e-06	Filtered
UFD1	0.150519	2.5288e-14	Filtered
NDUFV1	0.150344	6.51993e-55	Filtered
AC005520.2	0.149998	1	Filtered
MRFAP1L1	0.149965	1.25536e-06	Filtered
HNRNPA1	0.149961	9.47899e-31	Filtered
VCP	0.14963	6.49132e-55	Filtered
CEBPB	0.149264	9.90086e-35	Filtered
TSTA3	0.149253	0.0134581	Filtered
C16orf72	0.149209	2.38401e-12	Filtered
GLUL	0.148956	3.76729e-50	Filtered
SNHG16	0.148939	1.18403e-29	Filtered
PRPH2	0.148297	1	Filtered
HNRNPH3	0.148174	4.26193e-20	Filtered
SEC23A	0.147892	2.8987e-17	Filtered
NDUFAF7	0.14734	2.40464e-05	Filtered
COX15	0.146843	6.58384e-13	Filtered
PARP3	0.146682	0.010234	Filtered
TMEM237	0.146301	0.000103215	Filtered
MPHOSPH10	0.14627	6.11218e-11	Filtered
CAT	0.146145	5.10569e-18	Filtered
OXSM	0.145831	0.218028	Filtered
CTSZ	0.14578	0.212642	Filtered
FBXL3	0.14573	1.7014e-07	Filtered
RHEB	0.14531	9.26156e-26	Filtered
WDR61	0.14491	3.27168e-09	Filtered
ARG2	0.144552	8.71632e-08	Filtered
RIDA	0.144408	1.97118e-07	Filtered
PLEKHF2	0.1444	1.38532e-05	Filtered
PITX1	0.144244	1	Filtered
OSER1	0.143748	1.26312e-16	Filtered
ARL5A	0.143497	4.71154e-25	Filtered
MIS12	0.143135	0.142522	Filtered
GSN	0.143064	1	Filtered
CELSR2	0.143055	2.08629e-05	Filtered
PIGX	0.143036	4.65996e-05	Filtered
SETD7	0.142913	2.12523e-37	Filtered
SSRP1	0.142742	6.59762e-10	Filtered
MRPL37	0.142227	9.67165e-19	Filtered
UAP1	0.142215	1.18476e-05	Filtered
APPL1	0.14163	1.86585e-37	Filtered
YME1L1	0.141573	5.57855e-37	Filtered
IPO4	0.141221	1	Filtered
PRMT5	0.14105	1.56352e-05	Filtered
XRCC6	0.140982	3.04081e-27	Filtered
RBMX2	0.140854	1	Filtered
MRPS11	0.140293	1.50581e-06	Filtered
PRMT1	0.139732	1.17982e-39	Filtered
FAM217B	0.139499	1.38838e-07	Filtered
PGM2L1	0.139367	2.31917e-06	Filtered
LRRC39	0.138746	5.99832e-59	Filtered
MBD4	0.138703	1.69999e-07	Filtered
GARS	0.138379	2.75668e-07	Filtered
RAB9B	0.138321	0.0145383	Filtered
RAD23A	0.138225	9.19144e-18	Filtered
RAC1	0.137771	1.00919e-38	Filtered
CLTA	0.137141	1.14799e-18	Filtered
TM6SF1	0.136976	1.3865e-09	Filtered
ZC3H15	0.136476	3.57502e-22	Filtered
NAE1	0.135202	1.7873e-11	Filtered
LRRC47	0.135017	7.82821e-22	Filtered
TPR	0.134856	6.24366e-34	Filtered
MAPK9	0.134835	1.35099e-07	Filtered
UBE2B	0.134549	4.05159e-60	Filtered
DECR1	0.134535	3.04445e-23	Filtered
OGFRL1	0.134385	1.12795e-08	Filtered
SLC25A30	0.134305	2.96831e-16	Filtered
ATXN7L3	0.134146	0.174117	Filtered
AP1S2	0.134031	2.36144e-21	Filtered
HAX1	0.134014	9.18317e-21	Filtered
CUL3	0.133573	2.95332e-43	Filtered
YPEL5	0.133561	4.54382e-11	Filtered
GSTM1	0.132982	1	Filtered
FBXO45	0.132823	6.25663e-07	Filtered
BCAP29	0.132809	1.82829e-16	Filtered
DPY30	0.132069	3.44257e-08	Filtered
AGGF1	0.131905	1.8913e-12	Filtered
NADK2	0.131745	1.20064e-10	Filtered
FBP2	0.131679	1.46157e-54	Filtered
RALBP1	0.131675	1.78132e-11	Filtered
CARD19	0.131568	0.0743065	Filtered
ANKRD37	0.130904	6.63243e-06	Filtered
RASL10B	0.130852	0.0082396	Filtered
ARV1	0.130452	8.67721e-09	Filtered
DCXR	0.130201	1.40702e-23	Filtered
DDX42	0.130034	1.47772e-17	Filtered
CLTB	0.129623	6.84248e-33	Filtered
SSU72	0.12961	1.4376e-36	Filtered
LONRF2	0.129452	1.6622e-09	Filtered
NSMCE1	0.129277	4.30331e-08	Filtered
VPS51	0.129097	4.26368e-25	Filtered
FLAD1	0.128819	1.97377e-09	Filtered
KDELR2	0.128585	3.44889e-05	Filtered
PMVK	0.12784	1.03557e-07	Filtered
GGCX	0.126899	1.9635e-09	Filtered
G3BP1	0.126127	1.84556e-42	Filtered
LINC01634	0.126004	2.1168e-06	Filtered
IMP3	0.125811	3.32666e-06	Filtered
RTL6	0.125779	1	Filtered
XBP1	0.124804	0.000779694	Filtered
UQCRC2	0.124143	1.01636e-56	Filtered
UBA5	0.123954	6.68284e-08	Filtered
MSTN	0.122537	3.65157e-05	Filtered
SERINC2	0.122301	1.29964e-06	Filtered
RTCB	0.122213	1.60494e-09	Filtered
SMYD2	0.122209	2.8103e-29	Filtered
CISD2	0.121864	0.000165659	Filtered
RBM15-AS1	0.121774	0.00496176	Filtered
OXA1L	0.121635	1.68673e-24	Filtered
ARL16	0.121556	1	Filtered
SMIM41	0.121036	2.13324e-07	Filtered
PPP1R7	0.120931	8.63361e-16	Filtered
REXO4	0.120744	2.63311e-06	Filtered
DERL2	0.119939	0.0112384	Filtered
SLC25A5	0.119618	1	Filtered
TMED10	0.119256	8.34503e-22	Filtered
TLE5	0.11905	4.90602e-63	Filtered
RNF187	0.118948	9.75368e-19	Filtered
SERTAD1	0.118904	0.623341	Filtered
RAD23B	0.117811	5.75846e-45	Filtered
PITRM1	0.117378	5.44665e-20	Filtered
ZNF25	0.117049	6.54578e-17	Filtered
RNASEH2C	0.116309	0.000207806	Filtered
MRPL49	0.116292	1	Filtered
MRPL13	0.116232	1.19976e-15	Filtered
TMCO1	0.116224	4.05052e-13	Filtered
CASQ1	0.116131	1.29251e-10	Filtered
CKM	0.115998	7.55585e-11	Filtered
HIST1H2AC	0.115679	0.000100726	Filtered
CSTF1	0.115349	0.000387729	Filtered
LMO4	0.115333	8.43579e-22	Filtered
RANBP2	0.115075	7.66554e-37	Filtered
RBMS3-AS3	0.114831	2.82869e-07	Filtered
ADAL	0.114666	8.77803e-11	Filtered
PPM1G	0.114414	2.94896e-12	Filtered
ARL2BP	0.114085	1.24278e-06	Filtered
COMMD7	0.113958	6.97945e-11	Filtered
CYB5A	0.113899	0.749969	Filtered
MRPS31	0.113712	7.2803e-28	Filtered
EIF3E	0.112872	1.1602e-36	Filtered
RPL3	0.112842	2.47826e-10	Filtered
GOLT1B	0.112748	5.69943e-06	Filtered
AZIN1	0.112433	2.07879e-17	Filtered
HIRIP3	0.11184	6.93568e-06	Filtered
CCNG1	0.11167	4.20166e-27	Filtered
METTL23	0.11163	0.0195796	Filtered
SCARB2	0.111574	4.33034e-36	Filtered
STMP1	0.11107	4.48586e-30	Filtered
PHLDB2	0.110804	1	Filtered
GRTP1-AS1	0.10965	1	Filtered
RPN1	0.109206	1.20743e-10	Filtered
TMUB1	0.109098	4.2024e-05	Filtered
TADA2B	0.108732	3.25589e-17	Filtered
MAGED1	0.108711	2.40575e-12	Filtered
ZNF777	0.108682	0.00266453	Filtered
ATG4A	0.108382	9.0658e-09	Filtered
PSME2	0.108023	0.000717495	Filtered
GSTM4	0.107381	2.00263e-16	Filtered
POP4	0.106857	0.00137745	Filtered
SAP30L	0.106798	1	Filtered
GNL2	0.106405	7.80973e-08	Filtered
FAHD1	0.106241	0.0292981	Filtered
TPRG1L	0.106227	2.06481e-10	Filtered
ZFAND1	0.106194	2.96651e-07	Filtered
AIMP2	0.105999	4.58742e-34	Filtered
GRWD1	0.10549	0.0461997	Filtered
IFT57	0.104658	1	Filtered
ANKRD1	0.104513	4.86277e-19	Filtered
LSM1	0.104205	1.25797e-08	Filtered
TLCD4	0.104192	4.80218e-24	Filtered
ZFP90	0.103496	3.81547e-10	Filtered
MAF1	0.103449	5.21476e-25	Filtered
CD81	0.103201	2.12937e-10	Filtered
HRC	0.103171	2.85033e-54	Filtered
TIMM9	0.103078	8.75294e-15	Filtered
NAA50	0.102928	9.66234e-51	Filtered
KLF9	0.102896	1.4548e-40	Filtered
PGP	0.102153	1.8654e-18	Filtered
HRAS	0.102005	2.05547e-15	Filtered
DDX21	0.101753	2.23026e-10	Filtered
AKAP7	0.101734	2.34955e-22	Filtered
MRPS6	0.101487	3.10701e-20	Filtered
SIKE1	0.100818	1.82899e-08	Filtered
CCNI	0.100672	1.33439e-39	Filtered
CPT1B	0.10009	1.25799e-21	Filtered
ARL8A	0.100013	5.07809e-08	Filtered
LAMTOR1	-0.100968	2.36705e-23	Filtered
MED29	-0.100969	9.72239e-11	Filtered
SERPINE2	-0.101331	0.00802834	Filtered
MTHFS	-0.101422	1.39525e-09	Filtered
RRP1B	-0.101447	9.58569e-11	Filtered
NUDT21	-0.101503	2.55734e-11	Filtered
PSMB7	-0.10167	1.4503e-63	Filtered
SERPINF1	-0.101924	5.12808e-54	Filtered
DMAC2	-0.102056	2.07024e-08	Filtered
YTHDF2	-0.102563	1.09113e-25	Filtered
NEXN	-0.102583	7.91842e-52	Filtered
CITED2	-0.102885	1.74946e-14	Filtered
TBX1	-0.10295	3.37097e-35	Filtered
PROX1	-0.103028	5.22968e-09	Filtered
GZF1	-0.103453	0.000424798	Filtered
JUND	-0.103483	1.51002e-31	Filtered
SAT2	-0.103588	9.18271e-38	Filtered
FBXL5	-0.103664	1.78253e-41	Filtered
GTPBP10	-0.10379	3.71798e-14	Filtered
ARL6IP1	-0.10391	0.00159747	Filtered
RRP36	-0.104037	4.39447e-29	Filtered
SCYL2	-0.104318	1.11798e-15	Filtered
ERCC1	-0.104875	5.82556e-18	Filtered
GALC	-0.104939	3.64916e-10	Filtered
KCTD2	-0.10537	2.11959e-07	Filtered
KPNB1	-0.105573	2.86969e-50	Filtered
TFRC	-0.106035	5.45117e-40	Filtered
PYROXD2	-0.106071	9.1121e-05	Filtered
CAV3	-0.106141	2.13629e-49	Filtered
VPS4B	-0.106649	1.95916e-14	Filtered
CKAP5	-0.10686	3.87758e-53	Filtered
HLTF	-0.106928	4.28176e-09	Filtered
BCS1L	-0.107059	0.000343905	Filtered
OTUD1	-0.107068	3.04389e-06	Filtered
SLC2A5	-0.107156	1.65884e-18	Filtered
TMEM205	-0.107251	1.08183e-26	Filtered
SCHIP1	-0.10842	1.95335e-12	Filtered
QARS	-0.10843	7.61998e-36	Filtered
CDNF	-0.108632	2.75259e-17	Filtered
NMD3	-0.108865	7.09989e-07	Filtered
NUDT16	-0.109116	9.48757e-06	Filtered
MED31	-0.109411	1	Filtered
AP2A1	-0.109516	2.50203e-18	Filtered
NOP56	-0.109768	2.93176e-15	Filtered
GNAI1	-0.109924	0.000609027	Filtered
LIG3	-0.110228	2.04479e-11	Filtered
ENSA	-0.110249	2.1591e-39	Filtered
MAGI2-AS3	-0.110344	2.10759e-05	Filtered
CHMP4A	-0.110712	0.00162586	Filtered
SYNC	-0.110832	8.28654e-36	Filtered
CXorf40A	-0.110885	0.00074905	Filtered
MTCH1	-0.111343	7.18923e-15	Filtered
CA14	-0.111839	3.66487e-06	Filtered
COQ10A	-0.111916	4.04189e-61	Filtered
TFIP11	-0.112234	2.33877e-05	Filtered
AKT1	-0.112476	2.72994e-08	Filtered
MRE11	-0.112512	3.44133e-06	Filtered
STARD7	-0.113123	5.13226e-83	Filtered
ERAL1	-0.113226	1.01796e-07	Filtered
VEZF1	-0.113556	1.57778e-36	Filtered
ERAP1	-0.113998	7.36357e-07	Filtered
PLEKHJ1	-0.114327	6.9291e-16	Filtered
LRPAP1	-0.114366	2.22265e-24	Filtered
FXR2	-0.115106	2.68301e-24	Filtered
TMA16	-0.115173	4.63324e-05	Filtered
IFITM1	-0.115735	1	Filtered
JSRP1	-0.115749	9.32632e-85	Filtered
TMTC4	-0.116614	0.00228376	Filtered
ZNF747	-0.117011	4.66055e-06	Filtered
AMFR	-0.117179	4.04025e-33	Filtered
DUSP1	-0.117353	1.00125e-10	Filtered
MRPL45	-0.117612	1.24881e-24	Filtered
MRTO4	-0.118094	1	Filtered
KLF5	-0.118284	0.216602	Filtered
RITA1	-0.119274	9.34284e-11	Filtered
ASAH1	-0.119497	1.39421e-36	Filtered
NUDT19	-0.119814	2.08574e-28	Filtered
AHCY	-0.119822	4.34296e-07	Filtered
IMMP1L	-0.120788	1.73555e-30	Filtered
WASL	-0.121098	1.43766e-38	Filtered
GPR180	-0.122001	0.00904981	Filtered
PNPLA8	-0.122214	1.56895e-17	Filtered
DES	-0.122409	0.00381095	Filtered
PCYT2	-0.122957	0.00301899	Filtered
SPATA24	-0.123389	1	Filtered
SPCS2	-0.123453	1.40382e-29	Filtered
UCHL3	-0.123646	2.06782e-23	Filtered
PRKRA	-0.123675	4.37154e-30	Filtered
LARP6	-0.12419	0.00630633	Filtered
MRPL1	-0.124751	4.51272e-25	Filtered
TECR	-0.125086	1.15836e-77	Filtered
DNPEP	-0.125133	1.33376e-11	Filtered
TMEM106C	-0.125413	0.212606	Filtered
PLAA	-0.125422	1.1294e-15	Filtered
DHX16	-0.12544	3.45037e-15	Filtered
HNRNPDL	-0.125682	9.97187e-78	Filtered
PLGRKT	-0.125709	5.3408e-23	Filtered
SNRPN	-0.126174	2.01257e-33	Filtered
JMJD8	-0.126278	1	Filtered
YIPF7	-0.12665	8.84947e-44	Filtered
CDH5	-0.126811	1	Filtered
ARMC1	-0.126898	3.83583e-20	Filtered
ATP6V0E2	-0.127248	4.2768e-06	Filtered
PPP1R3B	-0.127492	2.36297e-57	Filtered
NDUFAF6	-0.127598	4.47946e-29	Filtered
BEST1	-0.127773	2.19419e-09	Filtered
CPSF2	-0.128388	7.18496e-20	Filtered
EIF2S3	-0.128482	1.29617e-22	Filtered
PACSIN3	-0.128514	3.51288e-70	Filtered
SUPT7L	-0.128797	1.38919e-14	Filtered
EPN1	-0.129074	3.08469e-38	Filtered
MCM3	-0.129356	0.0583977	Filtered
VCPIP1	-0.129553	5.24856e-15	Filtered
SEL1L	-0.129686	1.5835e-22	Filtered
RNF10	-0.12983	2.33769e-72	Filtered
FAM114A2	-0.130339	5.36673e-06	Filtered
MRS2	-0.130884	1.05561e-33	Filtered
UTP14A	-0.131216	0.000354548	Filtered
TRIP4	-0.131301	1.99713e-05	Filtered
CHERP	-0.131491	5.96372e-07	Filtered
CTSL	-0.132208	3.67947e-11	Filtered
HAGH	-0.132362	3.19725e-36	Filtered
P4HB	-0.132776	1.201e-38	Filtered
RARS	-0.132918	1.51215e-17	Filtered
EIF2B1	-0.133868	1.31516e-15	Filtered
PRPF31	-0.133965	1.97829e-11	Filtered
DBP	-0.133972	8.83593e-13	Filtered
NR1D1	-0.13418	2.65563e-11	Filtered
SOCS6	-0.134391	1.43411e-21	Filtered
MRPL19	-0.134448	2.49557e-57	Filtered
HBEGF	-0.134593	1.81358e-07	Filtered
MSH2	-0.134707	4.83477e-09	Filtered
ZNF302	-0.134778	1.51467e-23	Filtered
OLA1	-0.134856	1.97923e-53	Filtered
DHX38	-0.134902	3.65283e-18	Filtered
EEA1	-0.135002	6.64488e-76	Filtered
ELK4	-0.13504	2.40944e-20	Filtered
PPIG	-0.135103	4.74243e-43	Filtered
NUP58	-0.135196	3.14487e-27	Filtered
PIGT	-0.135717	2.46603e-07	Filtered
HERC6	-0.136718	0.0509528	Filtered
UXS1	-0.137196	2.08848e-09	Filtered
DPP8	-0.137406	1.61102e-36	Filtered
TIGD1	-0.137483	2.24946e-05	Filtered
AGTPBP1	-0.138001	1.66688e-30	Filtered
JOSD2	-0.138047	6.05722e-09	Filtered
DPCD	-0.138228	0.0584644	Filtered
PEX1	-0.138478	6.6765e-21	Filtered
CS	-0.138479	5.67777e-91	Filtered
BET1L	-0.138738	1.42155e-08	Filtered
LINC02609	-0.138936	0.00565943	Filtered
ANXA3	-0.138973	1	Filtered
ZFP36L2	-0.139053	2.76047e-05	Filtered
LTA4H	-0.139216	2.68541e-11	Filtered
TMBIM4	-0.13922	9.56003e-16	Filtered
ZBTB25	-0.140033	2.21265e-21	Filtered
PQBP1	-0.14029	4.08561e-15	Filtered
CD9	-0.140412	0.00228883	Filtered
RPS10	-0.140488	2.32195e-94	Filtered
ALKBH8	-0.1405	1.41349e-06	Filtered
SLC38A2	-0.140966	3.4889e-57	Filtered
AL080250.1	-0.141004	2.39683e-09	Filtered
SSBP4	-0.141297	3.82803e-07	Filtered
SPART	-0.141449	6.12509e-28	Filtered
TAGLN2	-0.141473	2.96445e-06	Filtered
ANXA2	-0.141623	3.84181e-06	Filtered
TMEM150A	-0.141646	4.3825e-10	Filtered
UBE2D3	-0.141772	4.82978e-83	Filtered
MUS81	-0.141989	1.57168e-08	Filtered
OXSR1	-0.142001	2.80338e-27	Filtered
AKAP12	-0.142228	0.163642	Filtered
SPATA7	-0.143117	0.00130562	Filtered
PRPF8	-0.143526	1.47687e-62	Filtered
ZNF358	-0.143563	8.01032e-37	Filtered
SLC25A53	-0.143703	5.62079e-11	Filtered
MBNL1-AS1	-0.143835	2.68507e-65	Filtered
RPUSD3	-0.143853	4.7616e-10	Filtered
DOHH	-0.143964	1	Filtered
STRADB	-0.144006	2.87966e-23	Filtered
CRYBG3	-0.144261	2.22847e-36	Filtered
MCRIP1	-0.1445	5.771e-09	Filtered
SAMM50	-0.144537	1.54193e-63	Filtered
KPNA3	-0.144775	4.65222e-86	Filtered
USP11	-0.144796	4.55026e-10	Filtered
KLHDC3	-0.144908	2.35902e-57	Filtered
TOMM40L	-0.145018	2.0139e-12	Filtered
TBL3	-0.145236	8.73402e-08	Filtered
ALKBH4	-0.145265	0.0498789	Filtered
SCN1B	-0.14561	1.28211e-65	Filtered
MEGF9	-0.14587	4.94019e-13	Filtered
SYNCRIP	-0.145982	4.11516e-59	Filtered
SGTA	-0.146118	9.16859e-24	Filtered
SQOR	-0.14631	5.67035e-31	Filtered
TOR1AIP2	-0.146607	1.90293e-22	Filtered
ZNF92	-0.146807	0.00222643	Filtered
GOLGA5	-0.146981	6.7159e-13	Filtered
PRKAG1	-0.146994	6.57865e-16	Filtered
PPP1CA	-0.14722	1.45132e-26	Filtered
ZFYVE21	-0.147307	0.000225363	Filtered
CLCC1	-0.148143	7.95407e-15	Filtered
AGPAT5	-0.14823	1.15336e-05	Filtered
PYGM	-0.148682	2.17642e-14	Filtered
CMC1	-0.148878	1.58701e-24	Filtered
CCDC69	-0.148918	1.17107e-72	Filtered
CANT1	-0.149322	1	Filtered
CEP57	-0.149485	3.77348e-16	Filtered
SLC25A23	-0.149589	5.49263e-22	Filtered
TXNRD1	-0.149744	1.6234e-58	Filtered
ZNF768	-0.149938	1.7658e-11	Filtered
MPLKIP	-0.150496	2.40488e-06	Filtered
ATG101	-0.150898	3.90218e-06	Filtered
GPR155	-0.151041	8.0583e-15	Filtered
ZNF672	-0.151109	5.18807e-12	Filtered
MOSPD1	-0.151179	1.23313e-08	Filtered
TRIM69	-0.151397	4.7717e-07	Filtered
OIP5-AS1	-0.151739	5.38719e-75	Filtered
MTX3	-0.151752	1.3735e-11	Filtered
COA7	-0.152109	3.38656e-08	Filtered
PDIA4	-0.152167	1	Filtered
COQ9	-0.152255	5.86283e-75	Filtered
BET1	-0.152379	1.72061e-08	Filtered
UGDH-AS1	-0.152766	1.95489e-11	Filtered
CLU	-0.153461	1	Filtered
GKAP1	-0.153618	4.40653e-45	Filtered
GUCD1	-0.153873	3.9796e-27	Filtered
ZBTB38	-0.154119	6.43445e-34	Filtered
HMGCL	-0.154154	2.50392e-22	Filtered
PECAM1	-0.154337	1	Filtered
INTS13	-0.154567	8.5793e-11	Filtered
TMEM150C	-0.154805	0.0019618	Filtered
SNX2	-0.154931	1.61109e-18	Filtered
JRKL	-0.155058	0.000221524	Filtered
POLR2H	-0.155515	0.00163928	Filtered
HK1	-0.155853	1.91767e-44	Filtered
CSNK2A2	-0.1561	2.15699e-14	Filtered
TOPORS	-0.156342	4.67023e-13	Filtered
BMS1	-0.156508	1.08022e-34	Filtered
OAT	-0.156868	2.9339e-16	Filtered
PAK2	-0.156927	3.50657e-33	Filtered
TSPAN3	-0.157012	1.22329e-67	Filtered
KAT2B	-0.157346	6.28547e-39	Filtered
CCDC141	-0.157826	4.00095e-20	Filtered
NDRG2	-0.157936	2.67172e-110	Filtered
VPS26A	-0.158485	2.8315e-14	Filtered
BRD3	-0.158949	8.24449e-24	Filtered
CENPB	-0.159335	9.78169e-07	Filtered
UBA1	-0.159599	4.32325e-33	Filtered
RECK	-0.160074	0.156821	Filtered
COQ6	-0.160306	7.21467e-09	Filtered
CYHR1	-0.160753	1.26066e-24	Filtered
RPUSD2	-0.16083	0.00294033	Filtered
DHX37	-0.161586	0.000233692	Filtered
JKAMP	-0.161849	2.54294e-19	Filtered
MDFIC	-0.162282	7.75677e-23	Filtered
DIS3	-0.162466	1.82592e-13	Filtered
PPP4R2	-0.162586	9.96852e-46	Filtered
THUMPD3	-0.162837	9.23141e-12	Filtered
2024-03-05	-0.162988	2.75837e-24	Filtered
SERINC3	-0.163679	1.49686e-25	Filtered
STT3A	-0.163689	1.37977e-10	Filtered
MRPS26	-0.164514	1.25968e-11	Filtered
VPS13B-DT	-0.164746	1.11466e-16	Filtered
G3BP2	-0.16481	4.23729e-64	Filtered
ZNF585A	-0.165248	3.81602e-07	Filtered
EI24	-0.165386	1.53795e-22	Filtered
[truncated: 17,435 more rows]
